# Supplementary material
Source: publisher figshare collection journal article supplement (https://acs.figshare.com/ndownloader/files/6007041)
Supplement: Supplementary file 1 [file 6007041]

## Supporting Information

# Rhodium-Catalyzed Asymmetric Arylation/Defluorination of 1-(Trifluoromethyl)alkenes Forming Enantioenriched 1,1-Difluoroalkenes

Yinhua Huang and Tamio Hayashi

Division of Chemistry and Biological Chemistry, School of Physical and Mathematical  
Sciences, Nanyang Technological University, 21 Nanyang Link, Singapore 637371,  
Singapore

*hayashi@ntu.edu.sg*

### Contents of Supporting Information:

|                                                                                         |     |
|-----------------------------------------------------------------------------------------|-----|
| 1. General information                                                                  | S2  |
| 2. Materials                                                                            | S2  |
| 3. Preparation of substrates                                                            | S3  |
| 4. A typical procedure for Table 1                                                      | S6  |
| 5. A general procedure for Table 2                                                      | S6  |
| 6. Characterization of the products                                                     | S7  |
| 7. A typical procedure for Scheme 3                                                     | S15 |
| 8. Derivatization of the Arylation/Defluorination Products                              | S17 |
| 9. References                                                                           | S21 |
| 10. Data for X-ray crystal structure of <b>3be</b>                                      | S22 |
| 11. <sup>1</sup> H, <sup>13</sup> C, <sup>19</sup> F NMR spectra and chiral HPLC charts | S24 |

## 1. General information

All air-sensitive manipulations were carried out with standard Schlenk techniques under nitrogen or argon. Solvents were degassed prior to use when necessary. NMR spectra were recorded on Bruker ACF-300 spectrometer (300 MHz for  $^1\text{H}$ , 75 MHz for  $^{13}\text{C}$ , and 282 MHz for  $^{19}\text{F}$ ), ACF-400 spectrometer (400 MHz for  $^1\text{H}$ , 100 MHz for  $^{13}\text{C}$ , and 377 MHz for  $^{19}\text{F}$ ) and ACF-500 spectrometer (500 MHz for  $^1\text{H}$ , 125 MHz for  $^{13}\text{C}$ ). Chemical shifts are reported in  $\delta$  (ppm) referenced to an internal  $\text{SiMe}_4$  standard ( $\delta = 0$  ppm) for  $^1\text{H}$  NMR, chloroform- $d$  ( $\delta = 77.0$  ppm) for  $^{13}\text{C}$  NMR. The following abbreviations were used; s: singlet, d: doublet, t: triplet, q: quartet, quint: quintet, m: multiplet, br: broad. Optical rotations were measured on an Anton Paar MCP 200 polarimeter. HRMS(ESI) were recorded on a time-of-flight (TOF) LC/MS instrument. Flash column chromatography was performed with Silica gel 60 (Merck) or  $\text{Al}_2\text{O}_3$  (activated 200) (Merck). The products were further purified by GPC (Gel Permeation Chromatography) if necessary. Enantiomeric excesses (ee) were determined by HPLC analysis on Shimadzu HPLC with Daicel chiral columns.

## 2. Materials

All chemicals and solvents were purchased from commercial company and used as received. Solvents were degassed before use if necessary.

Rhodium complexes,  $[\text{RhCl}(\text{cod})]_2$ ,<sup>1</sup>  $[\text{RhCl}(\text{coe})_2]_2$ ,<sup>2</sup>  $[\text{RhCl}((R,R)\text{-Fc-tfb*})]_2$ ,<sup>3</sup>  $[\text{RhCl}((R,R)\text{-Ph-tfb*})]_2$ ,<sup>3</sup>  $[\text{RhCl}((R,R)\text{-Ph-bod*})]_2$ ,<sup>4</sup>  $[\text{RhCl}((R,R)\text{-Fc-bod*})]_2$ ,<sup>5</sup> and  $[\text{RhCl}(R)\text{-diene*}]_2$ ,<sup>6</sup> were prepared according to the reported procedures.  $[\text{RhCl}(R)\text{-segphos}]_2$  and  $[\text{RhCl}(R)\text{-binap}]_2$  were generated in situ from  $[\text{RhCl}(\text{coe})_2]_2$  with  $(R)\text{-segphos}$  and  $(R)\text{-binap}$ , respectively.

Boroxines were prepared according to the following general procedure:<sup>7</sup> A solution of arylboronic acid (10 mmol) in toluene (30 mL) was refluxed for 2 h with a Dean–Stark trap. The resulting solution was filtered and concentrated under vacuum. The solid thus obtained was washed with pentane and dried under vacuum to give the corresponding arylboroxine as a colorless solid (90–99% yield).

### 3. Preparation of substrates

**1a** [610272-47-4],<sup>8</sup> **1c** [1683527-00-5],<sup>9</sup> **1d** [1821070-58-9],<sup>9</sup> **1i** [78622-55-6],<sup>10</sup> and **1j** [1373497-86-9]<sup>10</sup> were prepared according to reported procedures. **1h** was purchased from TCI (Tokyo Chemical Industry Co., Ltd.) and used as received.

(1) **1b** [1596343-10-0]<sup>11</sup> was prepared by the following procedure:

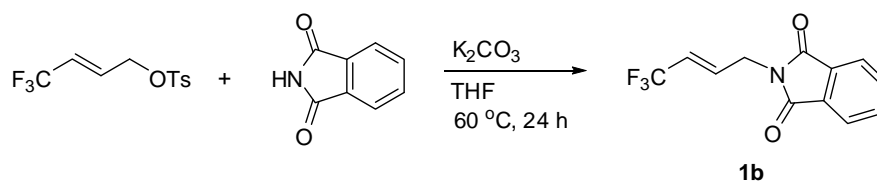

To a solution of (*E*)-4,4,4-trifluorobut-2-en-1-yl 4-methylbenzenesulfonate<sup>9</sup> (2.00 g, 7.14 mmol, 1.0 equiv) and phthalimide (1.26 g, 8.57 mmol, 1.2 equiv) in THF (20 mL) was added K<sub>2</sub>CO<sub>3</sub> (1.18 g, 8.57 mmol, 1.2 equiv). After stirring at 60 °C for 24 h, water (10 mL) was added and the mixture was extracted with Et<sub>2</sub>O (20 mL x 3). The organic layers were combined, washed with brine and water, and dried over anhydrous Na<sub>2</sub>SO<sub>4</sub>. After removal of solvent, the residue was purified by flash chromatography on silica gel (ethyl acetate/hexane = 1/7) to give **1b** (1.60 g, 88% yield) as a white solid.

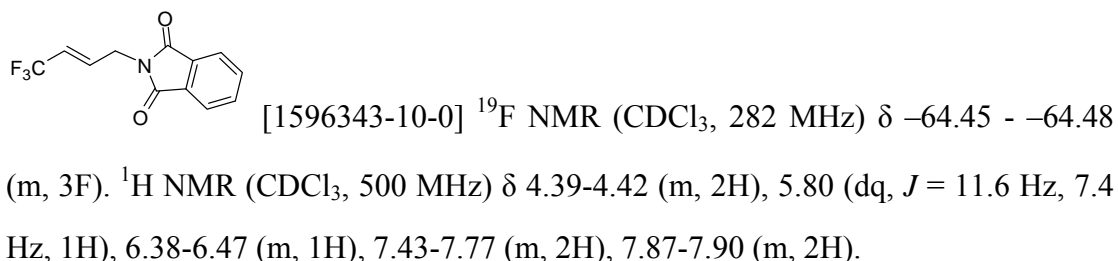

(2) **1f** was prepared by the reported procedure with slight modifications:<sup>9</sup>

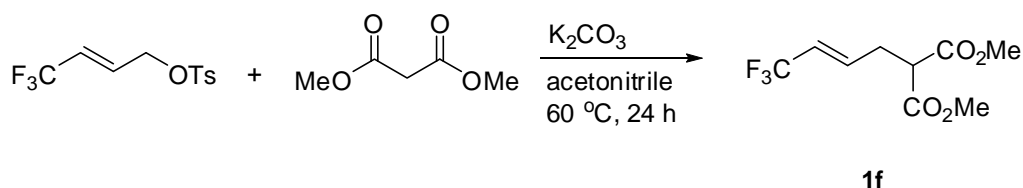

To a solution of (*E*)-4,4,4-trifluorobut-2-en-1-yl 4-methylbenzenesulfonate<sup>9</sup> (2.00 g,

7.14 mmol, 1.0 equiv) and dimethyl malonate (9.42 g, 71.4 mmol, 10 equiv) in acetonitrile (20 mL) was added K<sub>2</sub>CO<sub>3</sub> (1.18 g, 8.57 mmol, 1.2 equiv). After stirring at 60 °C for 24 h, water (10 mL) was added and the mixture was extracted with Et<sub>2</sub>O (20 mL x 3). The organic layers were combined, washed with brine and water, and dried over anhydrous Na<sub>2</sub>SO<sub>4</sub>. After removal of solvent, the residue was fractionally distilled to give **1f** (1.53 g, 89% yield) as a colorless liquid. (It was further purified by flash chromatography on silica gel with ethyl acetate/hexane = 1/10 if it contains dimethyl malonate)

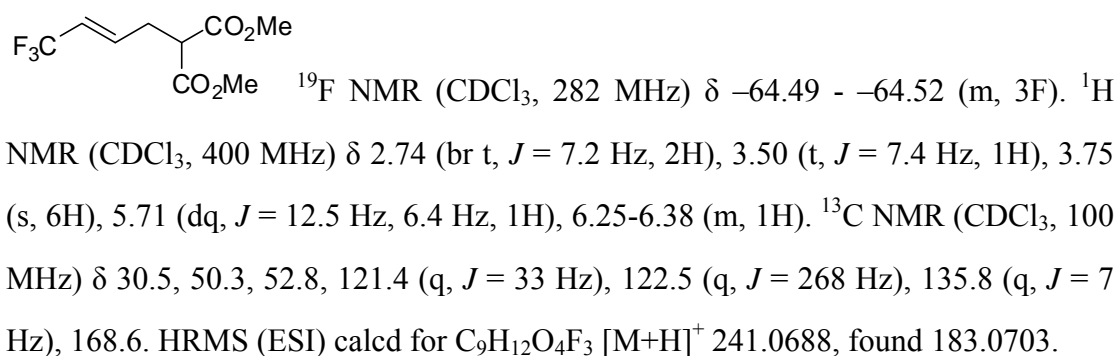

(3) **1e** was prepared by the following procedure:

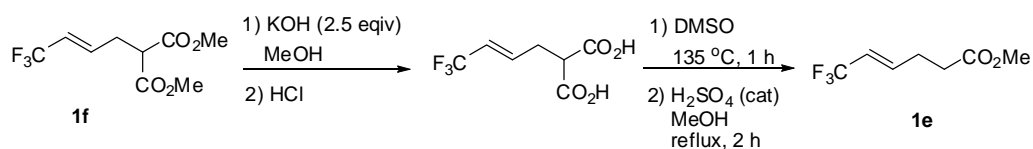

To a solution of KOH (1.75 g, 31.3 mmol, 2.5 equiv) in MeOH (10 mL) was added compound **1f** (3.00 g, 12.5 mmol). After the mixture was stirred at room temperature for 10 h, the solvent was removed thoroughly under reduced pressure. An aqueous HCl (2%) was added to acidify the mixture (pH2) and it was extracted with Et<sub>2</sub>O (30 mL x 3). The organic layers were combined, washed with brine and water, and dried over anhydrous Na<sub>2</sub>SO<sub>4</sub>. Filtration and removal of solvent gave a crude malonic acid which was used directly for the next step.

The crude malonic acid obtained above was dissolved in DMSO (10 mL) and the solution was heated at 135 °C for 2 h. The mixture was poured into water and extracted with Et<sub>2</sub>O (30 mL x 3). The organic layers were combined, washed with

brine and water, and dried over anhydrous Na<sub>2</sub>SO<sub>4</sub>. After filtration and removal of solvent, the residue was dissolved in MeOH (20 mL) and a drop of H<sub>2</sub>SO<sub>4</sub> was added. The mixture was heated to reflux and kept stirring for 2 h. After removal of solvent, the residue was purified by flash chromatography on silica gel (ethyl acetate/hexane = 1/10) to give **1e** (2.00 g, 88% yield based on **1f**) as a colorless oil.

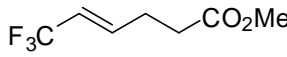 <sup>19</sup>F NMR (CDCl<sub>3</sub>, 282 MHz) δ -64.20 - -64.23 (m, 3F). <sup>1</sup>H NMR (CDCl<sub>3</sub>, 500 MHz) δ 2.47-2.49 (m, 4H), 3.69 (s, 3H), 5.67 (dq, *J* = 12.6 Hz, 6.6 Hz, 1H), 6.36-6.41 (m, 1H). <sup>13</sup>C NMR (CDCl<sub>3</sub>, 125 MHz) δ 26.6, 32.2, 51.8, 119.6 (q, *J* = 33 Hz), 122.8 (q, *J* = 267 Hz), 138.4 (q, *J* = 7 Hz), 172.5. HRMS (ESI) calcd for C<sub>7</sub>H<sub>10</sub>O<sub>2</sub>F<sub>3</sub> [M+H]<sup>+</sup> 183.0633, found 183.0637.

(4) **1g** was prepared by the following procedure:

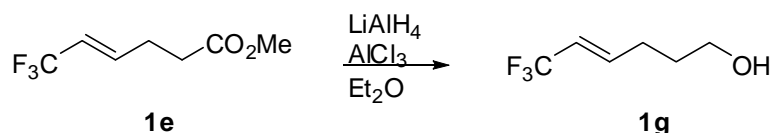

To a suspension of LiAlH<sub>4</sub> (0.42 g, 11.0 mmol) and AlCl<sub>3</sub> (0.51 g, 3.8 mmol) in Et<sub>2</sub>O (20 mL) was added a solution of **1e** (1.00 g, 5.49 mmol) in Et<sub>2</sub>O (5 mL) at 0 °C. After the mixture was stirred at 0 °C for 4 h, 10% aqueous HCl (10 mL) was carefully added to decompose excess LiAlH<sub>4</sub>. It was extracted with Et<sub>2</sub>O (3 x 20 mL), and the combined extracts were dried over Na<sub>2</sub>SO<sub>4</sub>. After filtration and removal of solvent, the residue was purified by flash chromatography on silica gel (ethyl acetate/hexane = 1/10) to give **1g** (0.61 g, 72%) (somewhat volatile).

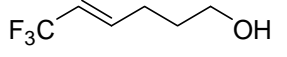 <sup>19</sup>F NMR (CDCl<sub>3</sub>, 377 MHz) δ -63.99 - -64.03 (m, 3F). <sup>1</sup>H NMR (CDCl<sub>3</sub>, 500 MHz) δ 1.68-1.75 (m, 2H), 1.78 (br s, 1H), 2.24-2.30 (m, 2H), 3.67 (t, *J* = 6.3 Hz, 2H), 5.65 (dq, *J* = 13.9 Hz, 7.1 Hz, 1H), 6.37-6.44 (m, 1H). <sup>13</sup>C NMR (CDCl<sub>3</sub>, 125 MHz) δ 27.8, 30.8, 61.8, 118.9 (q, *J* = 33 Hz), 123.0 (q, *J* = 267 Hz), 139.9 (q, *J* = 7 Hz). HRMS (ESI) calcd for C<sub>6</sub>H<sub>10</sub>OF<sub>3</sub> [M+H]<sup>+</sup> 155.0684, found 155.0683.

#### 4. A typical procedure for Table 1 (entry 10)

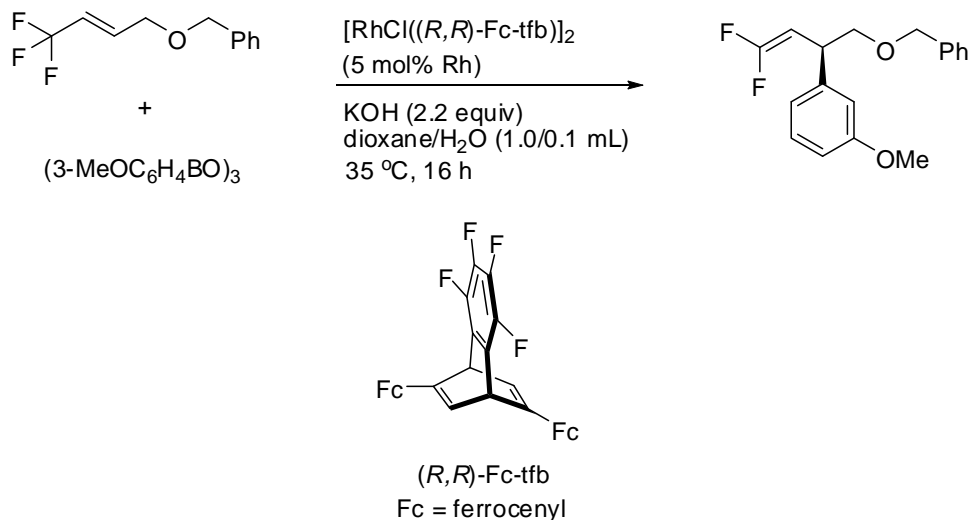

[RhCl((*R,R*)-Fc-tfb\*)]<sub>2</sub> (4.4 mg, 0.0060 mmol of Rh), (3-MeOC<sub>6</sub>H<sub>4</sub>BO)<sub>3</sub> (**2a**) (48.2 mg, 0.120 mmol, 0.360 mmol of B), trifluoromethylalkenes **1a** (25.9 mg, 0.12 mmol), and KOH (14.8 mg, 0.264 mmol) were placed in a Schlenk tube under nitrogen. 1,4-Dioxane (1.0 mL) and water (0.1 mL) were added, and the mixture was stirred at 35 °C for 16 h. The reaction mixture was passed through a short column of silica-gel with EtOAc as eluent. The solvent was removed on a rotary evaporator and the residue was subjected to silica-gel chromatography with EtOAc/hexane (5/95) to give **3aa** (32.5 mg, 0.108 mmol, 90% yield) as a colorless oil.

In entries 15 and 16, [RhCl(*R*)-binap)]<sub>2</sub> and [RhCl(*R*)-segphos)]<sub>2</sub> were generated in situ from [RhCl(coe)<sub>2</sub>]<sub>2</sub> (2.15 mg, 0.0060 mmol of Rh) with (*R*)-binap (4.11 mg, 0.0066 mmol) and (*R*)-segphos (4.03 mg, 0.0066 mmol), respectively.

#### 5. A general procedure for Table 2

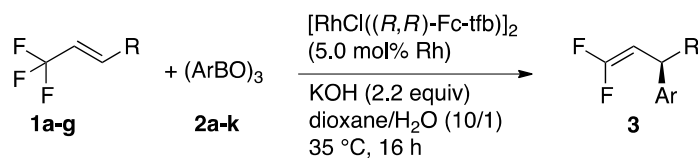

[RhCl((*R,R*)-Fc-tfb\*)]<sub>2</sub> (4.4 mg, 0.0060 mmol of Rh), arylboronoxine **2** (0.120 mmol, 0.360 mmol of B), trifluoromethylalkene **1** (0.12 mmol), and KOH (14.8 mg, 0.264 mmol) were placed in a Schlenk tube under nitrogen. 1,4-Dioxane (1.0 mL) and water

(0.1 mL) were added, and the mixture was stirred at 35 °C for 16 h. The reaction mixture was passed through a short column of silica-gel with EtOAc as eluent. The solvent was removed on a rotary evaporator and the residue was subjected to silica-gel chromatography to give **3**.

## 6. Characterization of the products

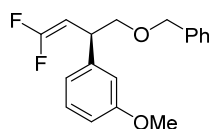

**Compound (R)-3aa.** The ee was measured by HPLC (Daicel Chiralpak IA column), CH<sub>2</sub>Cl<sub>2</sub>/hexane = 5/95, flow 0.8 mL/min, 280 nm,  $t_1$  = 10.5 min (major),  $t_2$  = 11.9 min (minor).  $[\alpha]_D^{25}$  -34.6 ( $c$  1.11, CHCl<sub>3</sub>) for 99% ee (*R*). <sup>19</sup>F NMR (CDCl<sub>3</sub>, 282 MHz)  $\delta$  -88.5 (dd,  $J$  = 42.6 Hz, 25.0 Hz, 1F), -87.4 (d,  $J$  = 42.6 Hz, 1F). <sup>1</sup>H NMR (CDCl<sub>3</sub>, 500 MHz)  $\delta$  3.61 (dd,  $J$  = 9.4 Hz, 7.5 Hz, 1H), 3.67 (dd,  $J$  = 9.4 Hz, 5.9 Hz, 1H), 3.77-3.82 (m, 1H), 3.80 (s, 3H), 4.52 (ddd,  $J$  = 25.0 Hz, 9.8 Hz, 2.7 Hz, 1H), 4.53 (s, 2H), 6.79 (s, 1H), 6.80 (d,  $J$  = 7.8 Hz, 1H), 6.83 (d,  $J$  = 7.6 Hz, 1H), 7.24 (t,  $J$  = 8.5 Hz, 1H), 7.27-7.35 (m, 5H). <sup>13</sup>C NMR (CDCl<sub>3</sub>, 125 MHz)  $\delta$  40.1 (d,  $J$  = 5 Hz), 55.2, 73.0, 73.7 (t,  $J$  = 2 Hz), 79.7 (dd,  $J$  = 23 Hz, 19 Hz), 112.1, 113.6, 119.8, 127.5, 127.6, 128.3, 129.5, 138.1, 142.5, 156.4 (t,  $J$  = 286 Hz), 159.8. HRMS (ESI) calcd for C<sub>18</sub>H<sub>19</sub>O<sub>2</sub>F<sub>2</sub> [M+H]<sup>+</sup> 305.1353, found 305.1352.

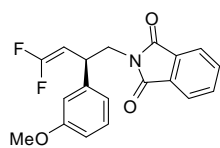

**Compound (R)-3ba.** The ee was measured by HPLC (Daicel Chiralpak IA column), 2-propanol/hexane = 3/97, flow 2.0 mL/min, 280 nm,  $t_1$  = 6.1 min (major),  $t_2$  = 8.0 min (minor).  $[\alpha]_D^{25}$  -20.7 ( $c$  1.16, CHCl<sub>3</sub>) for 99% ee (*R*). <sup>19</sup>F NMR (CDCl<sub>3</sub>, 282 MHz)  $\delta$  -88.3 (dd,  $J$  = 40 Hz, 24 Hz, 1F), -85.9 (d,  $J$  = 40 Hz, 1F). <sup>1</sup>H NMR (CDCl<sub>3</sub>, 400 MHz)  $\delta$  3.79 (s, 3H), 3.91 (d,  $J$  = 8.7 Hz, 2H), 4.07 (br q,  $J$  = 8.6 Hz, 1H), 4.52 (ddd,  $J$  = 24.2 Hz, 10.2 Hz, 2.1 Hz, 1H), 6.79 (dd,  $J$  = 7.8 Hz, 2.1 Hz, 1H), 6.83 (t,  $J$  = 2.1 Hz, 1H), 6.89 (d,  $J$  = 7.8 Hz, 1H), 7.24 (t,  $J$  = 7.8 Hz, 1H), 7.68-7.74 (m, 2H), 7.82-7.86 (m, 2H). <sup>13</sup>C NMR (CDCl<sub>3</sub>, 100 MHz)  $\delta$  38.8 (d,  $J$  = 5

Hz), 43.0, 55.2, 79.4 (dd,  $J = 23$  Hz, 19 Hz), 112.8, 113.1, 119.6, 123.4, 129.9, 131.8, 134.0, 141.6, 156.7 (t,  $J = 287$  Hz), 159.9, 168.1. HRMS (ESI) calcd for  $C_{19}H_{16}NO_3F_2$   $[M+H]^+$  344.1098, found 344.1099.

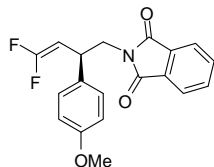

**Compound (R)-3bb.** The ee was measured by HPLC (Daicel Chiralpak IA column), 2-propanol/hexane = 3/97, flow 2.0 mL/min, 280 nm,  $t_1 = 7.7$  min (major),  $t_2 = 9.1$  min (minor).  $[\alpha]_D^{25} -17.5$  ( $c$  1.27,  $CHCl_3$ ) for 99% ee (*R*).  $^{19}F$  NMR ( $CDCl_3$ , 282 MHz)  $\delta$  -88.5 (dd,  $J = 41$  Hz, 24 Hz, 1F), -86.3 (d,  $J = 41$  Hz, 1F).  $^1H$  NMR ( $CDCl_3$ , 400 MHz)  $\delta$  3.78 (s, 3H), 3.87 (d,  $J = 8.7$  Hz, 2H), 4.05 (br q,  $J = 8.9$  Hz, 1H), 4.50 (ddd,  $J = 24.4$  Hz, 10.2 Hz, 2.2 Hz, 1H), 6.85 (d,  $J = 8.6$  Hz, 2H), 7.21 (d,  $J = 8.6$  Hz, 2H), 7.68-7.74 (m, 2H), 7.82-7.86 (m, 2H).  $^{13}C$  NMR ( $CDCl_3$ , 100 MHz)  $\delta$  38.0 (d,  $J = 5$  Hz), 43.1, 55.2, 79.6 (dd,  $J = 22$  Hz, 19 Hz), 114.2, 123.3, 128.3, 131.8, 132.1, 134.0, 156.6 (t,  $J = 287$  Hz), 158.8, 168.1. HRMS (ESI) calcd for  $C_{19}H_{16}NO_3F_2$   $[M+H]^+$  344.1098, found 344.1105.

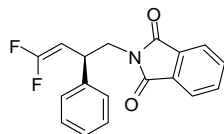

**Compound (R)-3bc.** The ee was measured by HPLC (Daicel Chiralpak IA column), 2-propanol/hexane = 3/97, flow 2.0 mL/min, 280 nm,  $t_1 = 10.3$  min (major),  $t_2 = 12.8$  min (minor).  $[\alpha]_D^{25} -24.5$  ( $c$  1.10,  $CHCl_3$ ) for 98% ee (*R*).  $^{19}F$  NMR ( $CDCl_3$ , 377 MHz)  $\delta$  -88.3 (dd,  $J = 41$  Hz, 24 Hz, 1F), -85.9 (d,  $J = 41$  Hz, 1F).  $^1H$  NMR ( $CDCl_3$ , 400 MHz)  $\delta$  3.90-3.93 (m, 2H), 4.10 (br q,  $J = 8.8$  Hz, 1H), 4.51 (ddd,  $J = 24.3$  Hz, 10.3 Hz, 2.2 Hz, 1H), 7.23-7.36 (m, 5H), 7.68-7.74 (m, 2H), 7.82-7.86 (m, 2H).  $^{13}C$  NMR ( $CDCl_3$ , 100 MHz)  $\delta$  38.8 (d,  $J = 5$  Hz), 43.1, 79.4 (dd,  $J = 23$  Hz, 19 Hz), 123.3, 127.3, 127.4, 128.8, 131.8, 134.0, 140.0, 156.7 (t,  $J = 287$  Hz), 168.1. HRMS (ESI) calcd for  $C_{18}H_{14}NO_2F_2$   $[M+H]^+$  314.0993, found 314.0992.



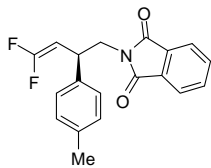

**Compound (R)-3bd.** The ee was measured by HPLC (Daicel Chiralpak IA column), IPA/hexane = 1/99, flow 2.0 mL/min, 280 nm,  $t_1$  = 8.0 min (major),  $t_2$  = 9.0 min (minor).  $[\alpha]_D^{25}$  -28.6 ( $c$  1.26, CHCl<sub>3</sub>) for 99% ee (*R*). <sup>19</sup>F NMR (CDCl<sub>3</sub>, 282 MHz)  $\delta$  -88.6 (dd,  $J$  = 41 Hz, 24 Hz, 1F), -86.2 (d,  $J$  = 41 Hz, 1F). <sup>1</sup>H NMR (CDCl<sub>3</sub>, 300 MHz)  $\delta$  2.32 (s, 3H), 3.87-3.91 (m, 2H), 4.07 (br q,  $J$  = 8.7 Hz, 1H), 4.52 (ddd,  $J$  = 24.3 Hz, 10.2 Hz, 2.2 Hz, 1H), 7.13 (d,  $J$  = 8.1 Hz, 2H), 7.20 (d,  $J$  = 8.1 Hz, 2H), 7.68-7.74 (m, 2H), 7.82-7.86 (m, 2H). <sup>13</sup>C NMR (CDCl<sub>3</sub>, 75 MHz)  $\delta$  21.0, 38.4 (d,  $J$  = 5 Hz), 43.1, 79.6 (dd,  $J$  = 22 Hz, 19 Hz), 123.3, 127.2, 129.5, 131.8, 134.0, 137.0, 137.1, 156.7 (t,  $J$  = 287 Hz), 168.1. HRMS (ESI) calcd for C<sub>19</sub>H<sub>16</sub>NO<sub>2</sub>F<sub>2</sub> [M+H]<sup>+</sup> 328.1149, found 328.1140.

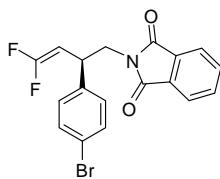

**Compound (R)-3be.** The ee was measured by HPLC (Daicel Chiralpak IA column), IPA/hexane = 1/99, flow 2.0 mL/min, 280 nm,  $t_1$  = 12.3 min (major),  $t_2$  = 13.4 min (minor).  $[\alpha]_D^{25}$  -9.7 ( $c$  2.59, CHCl<sub>3</sub>) for 99% ee (*R*). <sup>19</sup>F NMR (CDCl<sub>3</sub>, 377 MHz)  $\delta$  -87.4 (dd,  $J$  = 39 Hz, 24 Hz, 1F), -85.4 (d,  $J$  = 39 Hz, 1F). <sup>1</sup>H NMR (CDCl<sub>3</sub>, 400 MHz)  $\delta$  3.88 (d,  $J$  = 8.1 Hz, 2H), 4.07 (br q,  $J$  = 8.7 Hz, 1H), 4.49 (ddd,  $J$  = 24.2 Hz, 10.1 Hz, 2.1 Hz, 1H), 7.17 (d,  $J$  = 8.5 Hz, 2H), 7.44 (d,  $J$  = 8.5 Hz, 2H), 7.70-7.75 (m, 2H), 7.81-7.85 (m, 2H). <sup>13</sup>C NMR (CDCl<sub>3</sub>, 100 MHz)  $\delta$  38.3 (d,  $J$  = 5 Hz), 42.8, 79.1 (dd,  $J$  = 23 Hz, 19 Hz), 121.3, 123.4, 129.1, 131.7, 132.0, 134.1, 139.0, 156.7 (t,  $J$  = 288 Hz), 168.0. HRMS (ESI) calcd for C<sub>18</sub>H<sub>13</sub>NO<sub>2</sub>F<sub>2</sub>Br [M+H]<sup>+</sup> 392.0098, found 392.0107.

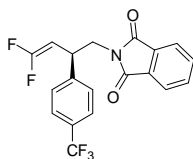

**Compound (R)-3bf.** The ee was measured by HPLC (Daicel Chiralpak IA column), 2-propanol/hexane = 1/99, flow 2.0 mL/min, 280 nm,  $t_1$  = 11.1

min (major),  $t_2 = 14.2$  min (minor).  $[\alpha]_D^{25} -14.5$  ( $c$  1.21,  $\text{CHCl}_3$ ) for 99% ee (*R*).  $^{19}\text{F}$  NMR ( $\text{CDCl}_3$ , 377 MHz)  $\delta$  -87.1 (dd,  $J = 38$  Hz, 24 Hz, 1F), -85.0 (d,  $J = 38$  Hz, 1F), -62.6 (s, 3F).  $^1\text{H}$  NMR ( $\text{CDCl}_3$ , 400 MHz)  $\delta$  3.93 (d,  $J = 8.1$  Hz, 2H), 4.18 (br q,  $J = 8.8$  Hz, 1H), 4.54 (ddd,  $J = 24.0$  Hz, 10.2 Hz, 2.0 Hz, 1H), 7.43 (d,  $J = 8.1$  Hz, 2H), 7.59 (d,  $J = 8.1$  Hz, 2H), 7.70-7.76 (m, 2H), 7.81-7.87 (m, 2H).  $^{13}\text{C}$  NMR ( $\text{CDCl}_3$ , 100 MHz)  $\delta$  38.7 (d,  $J = 5$  Hz), 42.7, 78.9 (dd,  $J = 24$  Hz, 19 Hz), 121.5, 124.0 (q,  $J = 270$  Hz), 125.8 (q,  $J = 4$  Hz), 127.8, 129.8 (q,  $J = 32$  Hz), 131.7, 134.2, 144.1, 156.9 (t,  $J = 288$  Hz), 168.0. HRMS (ESI) calcd for  $\text{C}_{19}\text{H}_{13}\text{NO}_2\text{F}_5$   $[\text{M}+\text{H}]^+$  382.0866, found 382.0866.

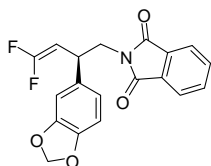

**Compound (*R*)-3bg.** The ee was measured by HPLC (Daicel

Chiralpak IA column), 2-propanol/hexane = 3/97, flow 2.0 mL/min, 280 nm,  $t_1 = 8.9$  min (major),  $t_2 = 10.4$  min (minor).  $[\alpha]_D^{25} -9.1$  ( $c$  1.21,  $\text{CHCl}_3$ ) for 99% ee (*R*).  $^{19}\text{F}$  NMR ( $\text{CDCl}_3$ , 282 MHz)  $\delta$  -88.1 (dd,  $J = 40$  Hz, 24 Hz, 1F), -86.0 (d,  $J = 40$  Hz, 1F).  $^1\text{H}$  NMR ( $\text{CDCl}_3$ , 300 MHz)  $\delta$  3.86 (d,  $J = 8.0$  Hz, 2H), 4.01 (br q,  $J = 8.7$  Hz, 1H), 4.47 (ddd,  $J = 24.3$  Hz, 10.1 Hz, 2.2 Hz, 1H), 5.92 (d,  $J = 1.3$  Hz, 1H), 5.93 (d,  $J = 1.3$  Hz, 1H), 6.72-6.77 (m, 2H), 6.79 (s, 1H), 7.70-7.76 (m, 2H), 7.81-7.87 (m, 2H).  $^{13}\text{C}$  NMR ( $\text{CDCl}_3$ , 75 MHz)  $\delta$  38.5 (d,  $J = 5$  Hz), 43.1, 79.5 (dd,  $J = 23$  Hz, 19 Hz), 101.1, 107.7, 108.5, 120.5, 123.4, 131.8, 133.9, 134.0, 146.8, 148.0, 156.6 (t,  $J = 288$  Hz), 168.1. HRMS (ESI) calcd for  $\text{C}_{19}\text{H}_{14}\text{NO}_4\text{F}_2$   $[\text{M}+\text{H}]^+$  358.0891, found 358.0903.

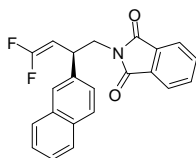

**Compound (*R*)-3bh.** The ee was measured by HPLC (Daicel

Chiralpak IA column), 2-propanol/hexane = 1/99, flow 2.0 mL/min, 280 nm,  $t_1 = 11.3$  min (major),  $t_2 = 15.9$  min (minor).  $[\alpha]_D^{25} -26.7$  ( $c$  1.48,  $\text{CHCl}_3$ ) for 99% ee (*R*).  $^{19}\text{F}$  NMR ( $\text{CDCl}_3$ , 377 MHz)  $\delta$  -88.0 (dd,  $J = 40$  Hz, 24 Hz, 1F), -85.6 (d,  $J = 40$  Hz, 1F).  $^1\text{H}$  NMR ( $\text{CDCl}_3$ , 500 MHz)  $\delta$  4.02 (d,  $J = 8.6$  Hz, 2H), 4.32 (br q,  $J = 7.1$  Hz, 1H), 4.64 (ddd,  $J = 24.3$  Hz, 10.3 Hz, 2.0 Hz, 1H), 7.46-7.53 (m, 3H), 7.71-7.88 (m, 8H).

$^{13}\text{C}$  NMR ( $\text{CDCl}_3$ , 100 MHz)  $\delta$  39.0 (d,  $J = 5$  Hz), 43.0, 79.5 (dd,  $J = 23$  Hz, 19 Hz), 123.4, 125.3, 126.0, 126.1, 126.3, 127.7, 127.8, 128.7, 131.8, 132.7, 133.5, 134.1, 137.4, 156.8 (t,  $J = 288$  Hz), 168.2. HRMS (ESI) calcd for  $\text{C}_{22}\text{H}_{16}\text{NO}_2\text{F}_2$   $[\text{M}+\text{H}]^+$  364.1149, found 364.1136.

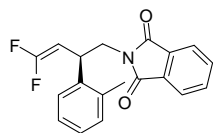

**Compound (R)-3bi.** The ee was measured by HPLC (Daicel Chiralpak IA column), 2-propanol/hexane = 1/99, flow 2.0 mL/min, 280 nm,  $t_1 = 6.2$  min (major),  $t_2 = 6.9$  min (minor).  $[\alpha]_{\text{D}}^{25} -61$  ( $c$  0.80,  $\text{CHCl}_3$ ) for 99% ee (*R*).  $^{19}\text{F}$  NMR ( $\text{CDCl}_3$ , 282 MHz)  $\delta$  -88.4 (dd,  $J = 41$  Hz, 24 Hz, 1F), -86.4 (dd,  $J = 41$  Hz, 2 Hz, 1F).  $^1\text{H}$  NMR ( $\text{CDCl}_3$ , 300 MHz)  $\delta$  2.47 (s, 3H), 3.80 (dd,  $J = 13.6$  Hz, 5.4 Hz, 1H), 3.94 (dd,  $J = 13.6$  Hz, 10.2 Hz, 1H), 4.30-4.40 (m, 1H), 4.55 (ddd,  $J = 24.3$  Hz, 10.3 Hz, 2.2 Hz, 1H), 7.13-7.31 (m, 4H), 7.70-7.76 (m, 2H), 7.83-7.88 (m, 2H).  $^{13}\text{C}$  NMR ( $\text{CDCl}_3$ , 75 MHz)  $\delta$  19.3, 34.6 (d,  $J = 5$  Hz), 42.4, 79.5 (dd,  $J = 22$  Hz, 19 Hz), 123.4, 126.2, 126.5, 127.2, 130.9, 131.8, 134.1, 136.0, 138.4, 156.7 (t,  $J = 287$  Hz), 168.2. HRMS (ESI) calcd for  $\text{C}_{19}\text{H}_{16}\text{NO}_2\text{F}_2$   $[\text{M}+\text{H}]^+$  328.1149, found 328.1141.

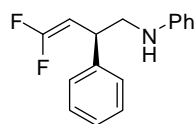

**Compound (R)-3cc.** The ee was measured by HPLC (Daicel Chiralpak IB column), 2-propanol/hexane = 1/99, flow 0.7 mL/min, 220 nm,  $t_1 = 9.1$  min (minor),  $t_2 = 10.3$  min (major).  $[\alpha]_{\text{D}}^{25} +21.8$  ( $c$  1.04,  $\text{CHCl}_3$ ) for 97% ee (*R*).  $^{19}\text{F}$  NMR ( $\text{CDCl}_3$ , 377 MHz)  $\delta$  -87.9 (dd,  $J = 42$  Hz, 25 Hz, 1F), -86.7 (d,  $J = 42$  Hz, 1F).  $^1\text{H}$  NMR ( $\text{CDCl}_3$ , 400 MHz)  $\delta$  3.40 (d,  $J = 7.3$  Hz, 1H), 3.64 (s, br, 1H), 3.83 (br q,  $J = 8.3$  Hz, 1H), 4.52 (ddd,  $J = 24.6$  Hz, 10.0 Hz, 1.8 Hz, 1H), 6.60 (d,  $J = 8.2$  Hz, 2H), 6.74 (t,  $J = 7.2$  Hz, 1H), 7.19 (t,  $J = 7.6$  Hz, 2H), 7.23-7.30 (m, 3H), 7.36 (t,  $J = 7.5$  Hz, 2H).  $^{13}\text{C}$  NMR ( $\text{CDCl}_3$ , 100 MHz)  $\delta$  39.3 (d,  $J = 4$  Hz), 49.5, 80.2 (dd,  $J = 22$  Hz, 20 Hz), 113.2, 117.9, 127.2, 127.4, 128.9, 129.3, 141.1, 147.5, 156.6 (t,  $J = 287$  Hz). HRMS (ESI) calcd for  $\text{C}_{16}\text{H}_{16}\text{NF}_2$   $[\text{M}+\text{H}]^+$  260.1251, found 260.1252.

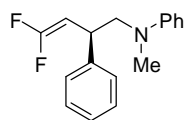

**Compound (R)-3dc.** The ee was measured by HPLC (Daicel Chiralpak IB column), 2-propanol/hexane = 1/99, flow 1.0 mL/min, 220 nm,  $t_1$  = 5.5 min (minor),  $t_2$  = 6.3 min (major).  $[\alpha]_D^{25}$  +53 ( $c$  0.98,  $\text{CHCl}_3$ ) for 98% ee (*R*).  $^{19}\text{F}$  NMR ( $\text{CDCl}_3$ , 377 MHz)  $\delta$  -88.4 (dd,  $J$  = 43 Hz, 25 Hz, 1F), -87.0 (d,  $J$  = 43 Hz, 1F).  $^1\text{H}$  NMR ( $\text{CDCl}_3$ , 400 MHz)  $\delta$  2.74 (s, 3H), 3.50 (dd,  $J$  = 14.6 Hz, 7.3 Hz, 1H), 3.66 (dd,  $J$  = 14.6 Hz, 7.6 Hz, 1H), 3.93 (br q,  $J$  = 8.4 Hz, 1H), 4.53 (ddd,  $J$  = 24.5 Hz, 10.1 Hz, 2.5 Hz, 1H), 6.68 (d,  $J$  = 8.1 Hz, 2H), 6.72 (t,  $J$  = 7.3 Hz, 1H), 7.20-7.27 (m, 5H), 7.33 (t,  $J$  = 7.3 Hz, 2H).  $^{13}\text{C}$  NMR ( $\text{CDCl}_3$ , 100 MHz)  $\delta$  38.4 (d,  $J$  = 4 Hz), 39.3, 59.4, 80.0 (dd,  $J$  = 22 Hz, 20 Hz), 112.0, 116.4, 127.0, 127.4, 128.8, 129.2, 141.7, 148.7, 156.3 (t,  $J$  = 287 Hz). HRMS (ESI) calcd for  $\text{C}_{17}\text{H}_{18}\text{NF}_2$   $[\text{M}+\text{H}]^+$  274.1407, found 274.1404.

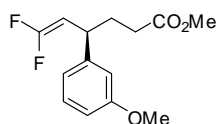

**Compound (R)-3ea.** The ee was measured by HPLC (Daicel Chiralpak IB column), 2-propanol/hexane = 1/99, flow 1.0 mL/min, 220 nm,  $t_1$  = 7.7 min (minor),  $t_2$  = 8.3 min (major).  $[\alpha]_D^{25}$  -40.6 ( $c$  1.78,  $\text{CHCl}_3$ ) for 95% ee (*R*).  $^{19}\text{F}$  NMR ( $\text{CDCl}_3$ , 377 MHz)  $\delta$  -89.3 (dd,  $J$  = 44 Hz, 25 Hz, 1F), -88.1 (d,  $J$  = 44 Hz, 1F).  $^1\text{H}$  NMR ( $\text{CDCl}_3$ , 400 MHz)  $\delta$  1.93-2.11 (m, 2H), 2.23-2.37 (m, 2H), 3.45 (br q,  $J$  = 8.6 Hz, 1H), 3.66 (s, 3H), 3.80 (s, 3H), 4.36 (ddd,  $J$  = 24.5 Hz, 10.3 Hz, 2.5 Hz, 1H), 6.73-6.80 (m, 3H), 7.24 (t,  $J$  = 7.9 Hz, 1H).  $^{13}\text{C}$  NMR ( $\text{CDCl}_3$ , 100 MHz)  $\delta$  31.6, 31.9, 39.1 (d,  $J$  = 5 Hz), 51.6, 55.2, 81.8 (dd,  $J$  = 21 Hz, 19 Hz), 111.9, 113.1, 119.3, 129.8, 144.6, 156.2 (t,  $J$  = 286 Hz), 159.9, 173.5. HRMS (ESI) calcd for  $\text{C}_{14}\text{H}_{17}\text{O}_3\text{F}_2$   $[\text{M}+\text{H}]^+$  271.1146, found 271.1147.

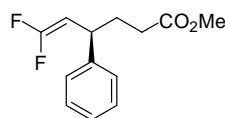

**Compound (R)-3ec.** The ee was measured by HPLC (Daicel Chiralpak IB column), 2-propanol/hexane = 1/99, flow 1.0 mL/min, 220 nm,  $t_1$  = 5.6 min (minor),  $t_2$  = 6.3 min (major).  $[\alpha]_D^{25}$  -47.0 ( $c$  1.08,  $\text{CHCl}_3$ ) for 96% ee (*R*).  $^{19}\text{F}$  NMR ( $\text{CDCl}_3$ , 377 MHz)  $\delta$  -89.4 (dd,  $J$  = 45 Hz, 25 Hz, 1F), -88.1 (d,  $J$  = 45 Hz, 1F).

$^1\text{H}$  NMR ( $\text{CDCl}_3$ , 400 MHz)  $\delta$  1.94-2.12 (m, 2H), 2.23-2.37 (m, 2H), 3.48 (br q,  $J$  = 8.6 Hz, 1H), 3.66 (s, 3H), 4.38 (ddd,  $J$  = 24.5 Hz, 10.3 Hz, 2.5 Hz, 1H), 7.18-7.25 (m, 3H), 7.32 (t,  $J$  = 7.8 Hz, 2H).  $^{13}\text{C}$  NMR ( $\text{CDCl}_3$ , 100 MHz)  $\delta$  31.6, 31.9, 39.0 (d,  $J$  = 5 Hz), 51.6, 81.7 (dd,  $J$  = 21 Hz, 20 Hz), 126.8, 127.0, 128.8, 142.9, 156.2 (t,  $J$  = 286 Hz), 173.5. HRMS (ESI) calcd for  $\text{C}_{13}\text{H}_{15}\text{O}_2\text{F}_2$   $[\text{M}+\text{H}]^+$  241.1040, found 241.1038.

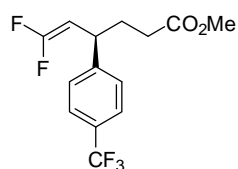

**Compound (R)-3ef.** The ee was measured by HPLC (Daicel Chiralpak IB column), 2-propanol/hexane = 1/99, flow 0.6 mL/min, 220 nm,  $t_1$  = 9.7 min (minor),  $t_2$  = 10.1 min (major).  $[\alpha]_{\text{D}}^{25}$  -38 ( $c$  0.92,  $\text{CHCl}_3$ ) for 98% ee (*R*).  $^{19}\text{F}$  NMR ( $\text{CDCl}_3$ , 377 MHz)  $\delta$  -88.3 (dd,  $J$  = 42 Hz, 24 Hz, 1F), -87.1 (d,  $J$  = 42 Hz, 1F), -62.5 (s, 3F).  $^1\text{H}$  NMR ( $\text{CDCl}_3$ , 400 MHz)  $\delta$  1.95-2.13 (m, 2H), 2.24-2.38 (m, 2H), 3.57 (br q,  $J$  = 8.6 Hz, 1H), 3.66 (s, 3H), 4.37 (ddd,  $J$  = 24.2 Hz, 10.2 Hz, 2.4 Hz, 1H), 7.32 (d,  $J$  = 8.0 Hz, 2H), 7.58 (d,  $J$  = 8.0 Hz, 2H).  $^{13}\text{C}$  NMR ( $\text{CDCl}_3$ , 100 MHz)  $\delta$  31.4, 31.7, 38.9 (d,  $J$  = 5 Hz), 51.7, 81.1 (dd,  $J$  = 22 Hz, 20 Hz), 124.0 (q,  $J$  = 270 Hz), 125.7 (q,  $J$  = 4 Hz), 127.4, 129.3 (q,  $J$  = 32 Hz), 147.0, 156.4 (t,  $J$  = 288 Hz), 173.2. HRMS (ESI) calcd for  $\text{C}_{14}\text{H}_{14}\text{NO}_2\text{F}_5$   $[\text{M}+\text{H}]^+$  309.0914, found 309.0911.

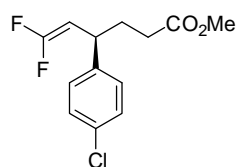

**Compound (R)-3ej.** The ee was measured by HPLC (Daicel Chiralpak IA column),  $\text{CH}_2\text{Cl}_2$ /hexane = 5/95, flow 1.0 mL/min, 230 nm,  $t_1$  = 13.4 min (major),  $t_2$  = 15.2 min (minor).  $[\alpha]_{\text{D}}^{25}$  -55 ( $c$  0.92,  $\text{CHCl}_3$ ) for 96% ee (*R*).  $^{19}\text{F}$  NMR ( $\text{CDCl}_3$ , 282 MHz)  $\delta$  -88.8 (dd,  $J$  = 43 Hz, 24 Hz, 1F), -87.6 (d,  $J$  = 43 Hz, 1F).  $^1\text{H}$  NMR ( $\text{CDCl}_3$ , 300 MHz)  $\delta$  1.92-2.08 (m, 2H), 2.20-2.32 (m, 2H), 3.47 (br q,  $J$  = 8.5 Hz, 1H), 3.66 (s, 3H), 4.32 (ddd,  $J$  = 24.3 Hz, 10.2 Hz, 2.5 Hz, 1H), 7.12 (d,  $J$  = 8.4 Hz, 2H), 7.29 (d,  $J$  = 8.4 Hz, 2H).  $^{13}\text{C}$  NMR ( $\text{CDCl}_3$ , 75 MHz)  $\delta$  31.5, 31.8, 38.4 (d,  $J$  = 5 Hz), 51.6, 81.5 (dd,  $J$  = 21 Hz, 20 Hz), 128.4, 128.9, 132.6, 141.4, 156.3 (t,  $J$  = 287 Hz), 173.3. HRMS (ESI) calcd for  $\text{C}_{13}\text{H}_{14}\text{O}_2\text{F}_2\text{Cl}$   $[\text{M}+\text{H}]^+$  275.0659, found

275.0650.

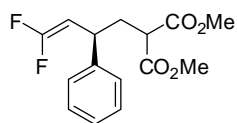

**Compound (R)-3fc.** The ee was measured by HPLC (Daicel Chiralpak IA column), IPA/hexane = 1/99, flow 2.0 mL/min, 280 nm,  $t_1$  = 4.2 min (major),  $t_2$  = 5.4 min (minor).  $[\alpha]_D^{25}$  -30 ( $c$  0.98,  $\text{CHCl}_3$ ) for 96% ee (*R*).  $^{19}\text{F}$  NMR ( $\text{CDCl}_3$ , 282 MHz)  $\delta$  -88.7 (dd,  $J$  = 43 Hz, 24 Hz, 1F), -87.3 (d,  $J$  = 43 Hz, 1F).  $^1\text{H}$  NMR ( $\text{CDCl}_3$ , 300 MHz)  $\delta$  2.20-2.42 (m, 2H), 3.35 (t,  $J$  = 7.4 Hz, 1H), 3.50 (br q,  $J$  = 8.5 Hz, 1H), 3.71 (s, 3H), 3.75 (s, 3H), 4.38 (ddd,  $J$  = 24.2 Hz, 10.4 Hz, 2.5 Hz, 1H), 7.18-7.30 (m, 5H).  $^{13}\text{C}$  NMR ( $\text{CDCl}_3$ , 100 MHz)  $\delta$  35.5, 37.7 (d,  $J$  = 5 Hz), 49.8, 52.59, 52.63, 81.4 (dd,  $J$  = 22 Hz, 19 Hz), 127.0, 127.1, 128.8, 142.2, 156.3 (t,  $J$  = 288 Hz), 169.3, 169.5. HRMS (ESI) calcd for  $\text{C}_{15}\text{H}_{17}\text{O}_4\text{F}_2$   $[\text{M}+\text{H}]^+$  299.1095, found 299.1095.

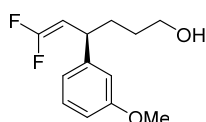

**Compound (R)-3ga.** The ee was measured by HPLC (Daicel Chiralpak IC column), 2-propanol/hexane = 3/97, flow 1.0 mL/min, 280 nm,  $t_1$  = 13.0 min (minor),  $t_2$  = 16.4 min (major).  $[\alpha]_D^{25}$  -60.9 ( $c$  1.40,  $\text{CHCl}_3$ ) for 98% ee (*R*).  $^{19}\text{F}$  NMR ( $\text{CDCl}_3$ , 377 MHz)  $\delta$  -90.0 (dd,  $J$  = 46 Hz, 25 Hz, 1F), -88.8 (d,  $J$  = 46 Hz, 1F).  $^1\text{H}$  NMR ( $\text{CDCl}_3$ , 400 MHz)  $\delta$  1.31 (br s, 1H), 1.46-1.86 (m, 4H), 3.43 (br q,  $J$  = 8.4 Hz, 1H), 3.64 (t,  $J$  = 6.5 Hz, 2H), 3.80 (s, 3H), 4.37 (ddd,  $J$  = 24.7 Hz, 10.2 Hz, 2.6 Hz, 1H), 6.74-6.80 (m, 3H), 7.23 (t,  $J$  = 7.8 Hz, 1H).  $^{13}\text{C}$  NMR ( $\text{CDCl}_3$ , 100 MHz)  $\delta$  30.6, 32.9, 39.5 (d,  $J$  = 5 Hz), 55.2, 62.6, 82.4 (t,  $J$  = 20 Hz), 111.6, 113.1, 119.3, 129.6, 145.5, 156.0 (t,  $J$  = 286 Hz), 159.8. HRMS (ESI) calcd for  $\text{C}_{13}\text{H}_{17}\text{O}_2\text{F}_2$   $[\text{M}+\text{H}]^+$  243.1197, found 243.1188.

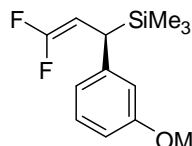

**Compound (R)-3ha** (It was purified by GPC. It would decompose in silica-gel column). The ee was measured by HPLC (Daicel Chiralpak IB column), pure hexane, flow 0.8 mL/min, 280 nm,  $t_1$  = 9.5 min (minor),  $t_2$  = 16.4 min (major).

$[\alpha]_D^{25}$   $-33.4$  ( $c$  1.73,  $\text{CHCl}_3$ ) for 96% ee (*R*).  $^{19}\text{F}$  NMR ( $\text{CDCl}_3$ , 282 MHz)  $\delta$   $-90.6$  (dd,  $J = 49$  Hz, 23 Hz, 1F),  $-90.3$  (ddd,  $J = 49$  Hz, 4 Hz, 2 Hz, 1F).  $^1\text{H}$  NMR ( $\text{CDCl}_3$ , 300 MHz)  $\delta$  0.00 (s, 9H), 2.95 (dd,  $J = 11.7$  Hz, 2.1 Hz, 1H), 3.79 (s, 3H), 4.57 (ddd,  $J = 22.6$  Hz, 11.7 Hz, 4.0 Hz, 1H), 6.58-6.70 (m, 3H), 7.18 (t,  $J = 7.9$  Hz, 1H).  $^{13}\text{C}$  NMR ( $\text{CDCl}_3$ , 75 MHz)  $\delta$   $-3.2$ , 31.5 (d,  $J = 2$  Hz), 55.1, 78.3 (t,  $J = 22$  Hz), 110.0, 113.0, 119.4, 129.3, 143.2, 155.3 (t,  $J = 284$  Hz), 159.6. HRMS (ESI) calcd for  $\text{C}_{13}\text{H}_{19}\text{OF}_2\text{Si}$   $[\text{M}+\text{H}]^+$  257.1173, found 257.1170.

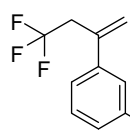

**Compound 4** [1402156-80-2]<sup>12</sup>.  $^{19}\text{F}$  NMR ( $\text{CDCl}_3$ , 377 MHz)  $\delta$   $-64.5$  (t,  $J = 10$  Hz, 3F).  $^1\text{H}$  NMR ( $\text{CDCl}_3$ , 400 MHz)  $\delta$  3.27 (q,  $J = 10.7$  Hz, 2H), 3.84 (s, 3H), 5.38 (s, 1H), 5.61 (s, 1H), 6.87 (dd,  $J = 8.2$  Hz, 2.6 Hz, 1H), 6.91 (t,  $J = 1.9$  Hz, 1H), 6.99 (dd,  $J = 8.2$  Hz, 1.6 Hz, 1H), 7.28 (t,  $J = 8.2$  Hz, 1H);

## 7. A typical procedure for scheme 3.

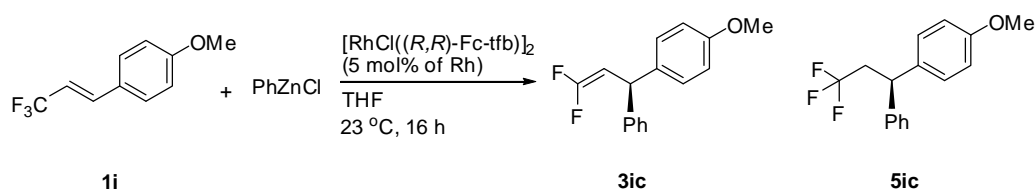

$[\text{RhCl}((R,R)\text{-Fc-tfb}^*)_2]$  (4.4 mg, 0.0060 mmol of Rh) and trifluoromethylalkene **1i** (24.3 mg, 0.12 mmol) were placed in a Schlenk tube under nitrogen.  $\text{PhZnCl}$  (0.48 mmol, 4.0 equiv, prepared from  $\text{ZnCl}_2$  and  $\text{PhMgBr}$ ) was added, and the mixture was stirred at room temperature ( $23^\circ\text{C}$ ) for 16 h.  $\text{NH}_4\text{Cl}$  (aq) was added at  $0^\circ\text{C}$  and it was extracted with ethyl acetate. The organic layer was combined, dried over  $\text{Na}_2\text{SO}_4$ , and evaporated under vacuum. The crude product was purified by silica-gel column chromatography with ethyl EtOAc/hexane (5/95) to give **3ic** (26.5 mg, 85%) as slight yellow liquid.

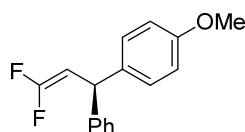

**Compound (R)-3ic.** The ee was measured by HPLC (Daicel

Chiralpak IA x 2 columns) (Two IA columns are connected), pure hexane, flow 0.6 mL/min, 280 nm,  $t_1$  = 28.9 min (minor),  $t_2$  = 30.0 min (major).  $[\alpha]_D^{25}$  +16.8 ( $c$  1.30, CHCl<sub>3</sub>) for 99% ee (*R*). <sup>19</sup>F NMR (CDCl<sub>3</sub>, 377 MHz)  $\delta$  -90.1 (dd,  $J$  = 44 Hz, 25 Hz, 1F), -88.5 (d,  $J$  = 44 Hz, 1F). <sup>1</sup>H NMR (CDCl<sub>3</sub>, 400 MHz)  $\delta$  3.80 (s, 3H), 4.75 (ddd,  $J$  = 23.6 Hz, 10.6 Hz, 2.2 Hz, 1H), 4.86 (d,  $J$  = 11.0 Hz, 1H), 6.86 (d,  $J$  = 8.7 Hz, 2H), 7.11 (d,  $J$  = 8.7 Hz, 2H), 7.19 (d,  $J$  = 7.4 Hz, 2H), 7.23 (t,  $J$  = 7.4 Hz, 1H), 7.32 (t,  $J$  = 7.3 Hz, 2H). <sup>13</sup>C NMR (CDCl<sub>3</sub>, 100 MHz)  $\delta$  43.7 (d,  $J$  = 5 Hz), 55.3, 82.2 (dd,  $J$  = 19 Hz, 22 Hz), 114.0, 126.6, 127.9, 128.6, 128.9, 135.3, 143.5, 155.9 (t,  $J$  = 286 Hz), 158.4. HRMS (ESI) calcd for C<sub>16</sub>H<sub>15</sub>OF<sub>2</sub> [M+H]<sup>+</sup> 261.1091, found 201.1095

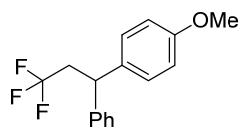

**Compound 5ic [1618086-15-9]<sup>13</sup>.** <sup>19</sup>F NMR (CDCl<sub>3</sub>, 377 MHz)  $\delta$  -63.7 (t,  $J$  = 10 Hz, 3F). <sup>1</sup>H NMR (CDCl<sub>3</sub>, 400 MHz)  $\delta$  2.88 (qd,  $J$  = 10.4 Hz, 7.4 Hz, 2H), 3.78 (s, 3H), 4.29 (t,  $J$  = 7.4 Hz, 1H), 6.84 (d,  $J$  = 8.7 Hz, 2H), 7.17 (d,  $J$  = 8.7 Hz, 2H), 7.21-7.26 (m, 3H), 7.31 (t,  $J$  = 7.4 Hz, 2H).

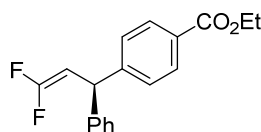

**Compound (*R*)-3jc.** The ee was measured by HPLC (Daicel Chiralpak IF column), 2-propanol/hexane = 1/99, flow 1.0 mL/min, 254 nm,  $t_1$  = 7.3 min (minor),  $t_2$  = 7.9 min (major).  $[\alpha]_D^{25}$  -2.76 ( $c$  1.05, CHCl<sub>3</sub>) for 99% ee (*R*). <sup>19</sup>F NMR (CDCl<sub>3</sub>, 282 MHz)  $\delta$  -89.1 (dd,  $J$  = 41 Hz, 24 Hz, 1F), -87.4 (d,  $J$  = 41 Hz, 1F). <sup>1</sup>H NMR (CDCl<sub>3</sub>, 400 MHz)  $\delta$  1.38 (t,  $J$  = 7.1 Hz, 3H), 4.37 (q,  $J$  = 7.1 Hz, 3H), 4.75 (ddd,  $J$  = 23.7 Hz, 10.4 Hz, 2.1 Hz, 1H), 4.93 (d,  $J$  = 10.5 Hz, 1H), 7.16 (d,  $J$  = 7.2 Hz, 2H), 7.23-7.27 (m, 3H), 7.32 (t,  $J$  = 7.3 Hz, 2H), 7.99 (d,  $J$  = 8.3 Hz, 2H). <sup>13</sup>C NMR (CDCl<sub>3</sub>, 100 MHz)  $\delta$  14.3, 44.5 (d,  $J$  = 5 Hz), 60.9, 81.5 (dd,  $J$  = 23 Hz, 19 Hz), 127.0, 127.86, 127.92, 128.8, 129.1, 129.9, 142.4, 148.1, 156.1 (t,  $J$  = 287 Hz), 166.4. HRMS (ESI) calcd for C<sub>18</sub>H<sub>17</sub>O<sub>2</sub>F<sub>2</sub> [M+H]<sup>+</sup> 303.1197, found 303.1194.



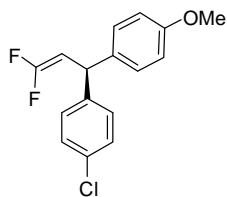

**Compound (S)-3ij.** The ee was measured by HPLC (Daicel Chiralpak IA x 2 columns) (Two IA columns are connected), pure hexane, flow 0.6 mL/min, 280 nm,  $t_1$  = 38.8 min (major),  $t_2$  = 43.6 min (minor).  $[\alpha]_D^{25}$  -26 ( $c$  0.75,  $\text{CHCl}_3$ ) for 99% ee (*S*).  $^{19}\text{F}$  NMR ( $\text{CDCl}_3$ , 377 MHz)  $\delta$  -89.6 (dd,  $J$  = 42 Hz, 23 Hz, 1F), -87.9 (d,  $J$  = 42 Hz, 1F).  $^1\text{H}$  NMR ( $\text{CDCl}_3$ , 400 MHz)  $\delta$  3.80 (s, 3H), 4.69 (ddd,  $J$  = 23.6 Hz, 10.4 Hz, 2.2 Hz, 1H), 4.81 (d,  $J$  = 10.4 Hz, 1H), 6.85 (d,  $J$  = 8.7 Hz, 2H), 7.07 (d,  $J$  = 8.7 Hz, 2H), 7.10 (d,  $J$  = 8.5 Hz, 2H), 7.27 (d,  $J$  = 8.5 Hz, 2H).  $^{13}\text{C}$  NMR ( $\text{CDCl}_3$ , 100 MHz)  $\delta$  43.2 (d,  $J$  = 5 Hz), 55.3, 81.9 (dd,  $J$  = 22 Hz, 19 Hz), 114.1, 128.7, 128.8, 129.2, 132.5, 134.7, 142.0, 156.0 (t,  $J$  = 287 Hz), 158.5. HRMS (ESI) calcd for  $\text{C}_{16}\text{H}_{14}\text{OF}_2\text{Cl}$   $[\text{M}+\text{H}]^+$  295.0701, found 295.0705.

## 8. Derivatization of the Arylation/Defluorination Products

### (1) Transformation of 3dc to 8a and 8b

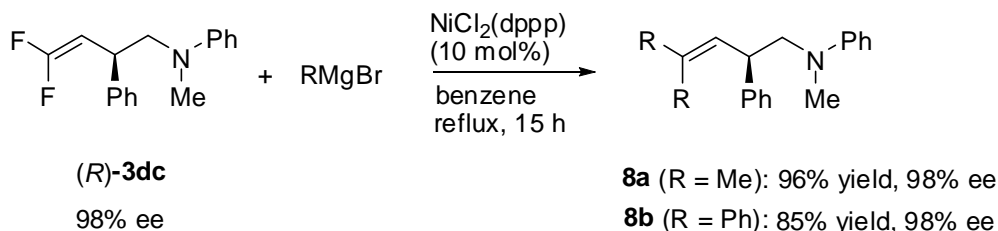

To a solution of **3dc** (41.0 mg, 0.15 mmol) and  $\text{NiCl}_2(\text{dppp})$  (8.1 mg, 0.01 mmol) in benzene (1.0 mL),  $\text{MeMgBr}$  (1.4 M in THF/toluene (1/3), 1.07 mL, 1.50 mmol) was added dropwise at 0 °C. The mixture was heated to reflux for 15 h.  $\text{NH}_4\text{Cl}$  (aq) was added at 0 °C and it was extracted with ethyl acetate. The organic layer was combined, dried over  $\text{Na}_2\text{SO}_4$ , and evaporated under vacuum. The crude product was purified by silica gel column chromatography with ethyl EtOAc/hexane (5/95) to give **8a** (38.2 mg, 96% yield) as a slight yellow liquid.

**8b** was prepared according to the above procedure using  $\text{PhMgBr}$  (3.0 M in diethyl ether, 5.0 mL, 1.5 mmol) instead of  $\text{MeMgBr}$  in 85% yield.

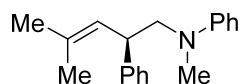

**Compound (R)-8a.** The ee was measured by HPLC (Daicel Chiralpak IB column), pure hexane, flow 0.7 mL/min, 280 nm,  $t_1$  = 13.1 min (minor),  $t_2$  = 13.9 min (major).  $[\alpha]_D^{25}$  +12.4 ( $c$  1.32,  $\text{CHCl}_3$ ) for 98% ee (*R*).  $^1\text{H}$  NMR ( $\text{CDCl}_3$ , 400 MHz)  $\delta$  1.58 (s, 3H), 1.75 (s, 3H), 2.77 (s, 3H), 3.57 (dd,  $J$  = 11.2 Hz, 4.1 Hz, 1H), 3.62 (dd,  $J$  = 11.2 Hz, 4.3 Hz, 1H), 3.99 (br q,  $J$  = 8.4 Hz, 1H), 5.48 (d,  $J$  = 9.6 Hz, 1H), 6.71 (d,  $J$  = 8.2 Hz, 2H), 6.72 (t,  $J$  = 7.8 Hz, 1H), 7.22-7.30 (m, 5H), 7.34 (t,  $J$  = 7.5 Hz, 2H).  $^{13}\text{C}$  NMR ( $\text{CDCl}_3$ , 100 MHz)  $\delta$  18.2, 26.1, 39.6, 42.8, 59.8, 111.8, 115.7, 125.7, 126.3, 127.7, 128.6, 129.1, 133.5, 144.0, 148.9. HRMS (ESI) calcd for  $\text{C}_{19}\text{H}_{24}\text{N}$   $[\text{M}+\text{H}]^+$  266.1909, found 266.1910.

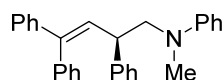

**Compound (R)-8b.** The ee was measured by HPLC (Daicel Chiralpak IF column),  $\text{CH}_2\text{Cl}_2$ /hexane = 1/99, flow 1.0 mL/min, 280 nm,  $t_1$  = 13.1 min (major),  $t_2$  = 14.3 min (minor).  $[\alpha]_D^{25}$  -94.7 ( $c$  1.55,  $\text{CHCl}_3$ ) for 98% ee (*R*).  $^1\text{H}$  NMR ( $\text{CDCl}_3$ , 400 MHz)  $\delta$  2.67 (s, 3H), 3.54 (dd,  $J$  = 14.5 Hz, 6.8 Hz, 1H), 3.81 (dd,  $J$  = 14.5 Hz, 8.0 Hz, 1H), 3.94 (dt,  $J$  = 10.6 Hz, 7.5 Hz, 1H), 6.39 (d,  $J$  = 10.5 Hz, 1H), 6.55 (d,  $J$  = 8.3 Hz, 2H), 6.71 (t,  $J$  = 7.2 Hz, 1H), 7.07-7.38 (m, 17H).  $^{13}\text{C}$  NMR ( $\text{CDCl}_3$ , 100 MHz)  $\delta$  39.1, 44.2, 59.5, 68.7, 111.9, 115.8, 126.5, 127.09, 127.10, 127.3, 127.7, 128.0, 128.1, 128.7, 128.8, 129.1, 129.7, 139.7, 142.3, 142.94, 142.96, 148.8. HRMS (ESI) calcd for  $\text{C}_{29}\text{H}_{28}\text{N}$   $[\text{M}+\text{H}]^+$  390.2222, found 390.2219.

## (2) Transformation of 3dc to 9

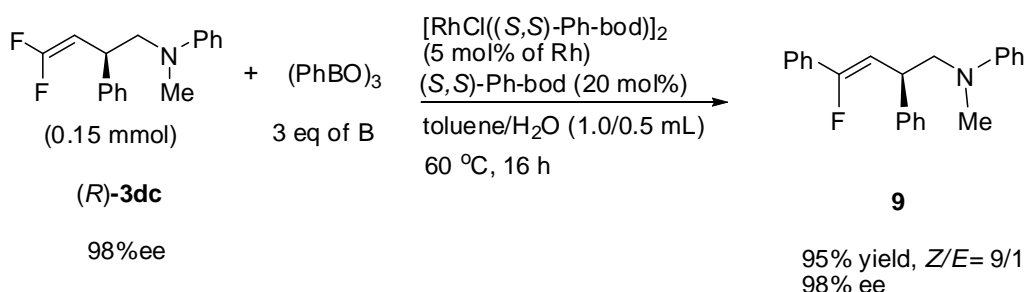

$[\text{RhCl}((S,S)\text{-Ph-bod}^*)]_2$  (2.9 mg, 0.0075 mmol of Rh), (*S,S*)-Ph-bod (7.8 mg, 0.03 mmol), phenylboroxine (**2c**) (46.8 mg, 0.150 mmol, 0.450 mmol of B), **3dc** (41.0 mg,

0.15 mmol), and KOH (18.5 mg, 0.330 mmol) were placed in a Schlenk tube under nitrogen. Toluene (1.0 mL) and water (0.5 mL) were added, and the mixture was stirred at 60 °C for 16 h. The reaction mixture was passed through a short column of silica-gel with EtOAc as eluent. The solvent was removed on a rotary evaporator. The crude  $^{19}\text{F}$  NMR of the mixture revealed *Z/E* isomers were formed in a ratio of 9/1. The residue was further purified by silica-gel chromatography.

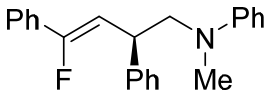 **Compound (R)-9**. The ee was measured by HPLC (Daicel Chiralpak IC column),  $\text{CH}_2\text{Cl}_2/\text{hexane} = 1/99$ , flow 1.0 mL/min, 254 nm,  $t_1 = 34.4$  min (minor),  $t_2 = 39.9$  min (major).  $[\alpha]_{\text{D}}^{25} -16.1$  ( $c$  1.77,  $\text{CHCl}_3$ ) for 98% ee (*R*) (mixture of *Z/E* isomers in a ratio of 9:1).  $^{19}\text{F}$  NMR ( $\text{CDCl}_3$ , 282 MHz)  $\delta -117.2$  (d,  $J = 36$  Hz, 1F, for *Z*-isomer),  $(-95.7$  (d,  $J = 22$  Hz, 1F, for *E*-isomer)).  $^1\text{H}$  NMR ( $\text{CDCl}_3$ , 400 MHz)  $\delta$  2.73 (s, 3H), 3.60 (dd,  $J = 14.6$  Hz, 7.6 Hz, 1H), 3.86 (dd,  $J = 14.6$  Hz, 7.2 Hz, 1H), 4.45 (br q,  $J = 8.1$  Hz, 1H), 5.70 (dd,  $J = 36.3$  Hz, 9.6 Hz, 1H), 6.71 (t,  $J = 8.0$  Hz, 1H), 6.75 (d,  $J = 7.9$  Hz, 2H), 7.23-7.36 (m, 10H), 7.46 (d,  $J = 7.9$  Hz, 2H).  $^{13}\text{C}$  NMR ( $\text{CDCl}_3$ , 100 MHz)  $\delta$  39.2, 40.0 (d,  $J = 3$  Hz), 59.4 (d,  $J = 1$  Hz), 106.9 (d,  $J = 17$  Hz), 112.1, 116.1, 124.2 (d,  $J = 7$  Hz), 126.7, 127.7, 128.4 (d,  $J = 2$  Hz), 128.7, 129.2, 132.3 (d,  $J = 29$  Hz), 142.4, 148.9, 157.3 (d,  $J = 248$  Hz). HRMS (ESI) calcd for  $\text{C}_{23}\text{H}_{23}\text{NF}$   $[\text{M}+\text{H}]^+$  332.1815, found 332.1818.

### (3) Transformation of **3bc** to **10**

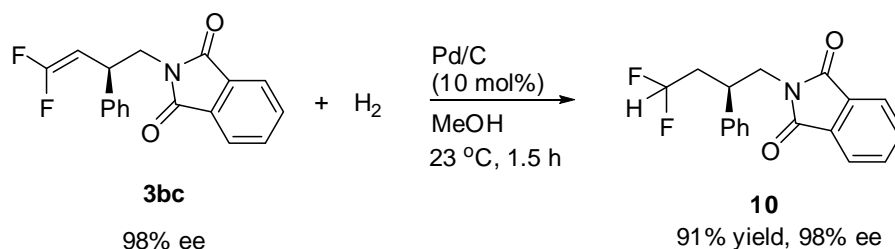

To a 25 mL flask equipped with a stir bar were added (*R*)-**3bc** (47.0 mg, 0.15 mmol), which was obtained in entry 4 in Table 2, in 2 mL of MeOH and 10% Pd/C (16.5 mg, 0.015 mmol). The mixture was allowed to stir under  $\text{H}_2$  atmosphere (using  $\text{H}_2$  balloon) at room temperature (23 °C) for 1.5 h. The reaction mixture was passed through a short column of silica-gel with EtOAc as eluent. The filtrate was

concentrated under reduce pressure and the residue was subjected to silica-gel chromatography with EtOAc/hexane (1/8) to give **10** (43.0 mg, 91%) as a white solid.

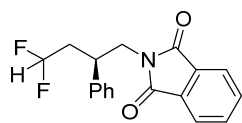

**Compound (R)-10.** The ee was measured by HPLC (Daicel

Chiralpak IA column), 2-propanol/hexane = 3/97, flow 2.0 mL/min, 280 nm,  $t_1$  = 9.8 min (major),  $t_2$  = 11.1 min (minor).  $[\alpha]_D^{25}$  +92 ( $c$  0.85,  $\text{CHCl}_3$ ) for 98% ee (*R*).  $^{19}\text{F}$  NMR ( $\text{CDCl}_3$ , 282 MHz)  $\delta$  -117.6 (dddd,  $J$  = 284 Hz, 57 Hz, 25 Hz, 17 Hz, 1F), -114.9 (ddt,  $J$  = 284 Hz, 56 Hz, 11 Hz, 1F).  $^1\text{H}$  NMR ( $\text{CDCl}_3$ , 400 MHz)  $\delta$  2.20-2.33 (m, 2H), 3.46 (quint,  $J$  = 9.0 Hz, 1H), 3.87-3.97 (m, 2H), 5.56 (tdd,  $J$  = 56.5 Hz, 6.7 Hz, 3.0 Hz, 1H), 7.23-7.34 (m, 5H), 7.70-7.74 (m, 2H), 7.80-7.83 (m, 2H).  $^{13}\text{C}$  NMR ( $\text{CDCl}_3$ , 100 MHz)  $\delta$  37.8 (t,  $J$  = 21 Hz), 39.1 (dd,  $J$  = 8 Hz, 3 Hz), 43.2, 116.1 (t,  $J$  = 238 Hz), 123.3, 127.6, 127.7, 128.9, 131.7, 134.0, 139.3, 168.1. HRMS (ESI) calcd for  $\text{C}_{18}\text{H}_{16}\text{NO}_2\text{F}_2$   $[\text{M}+\text{H}]^+$  316.1149, found 316.1149.

#### (4) Transformation of **3bc** to **11**

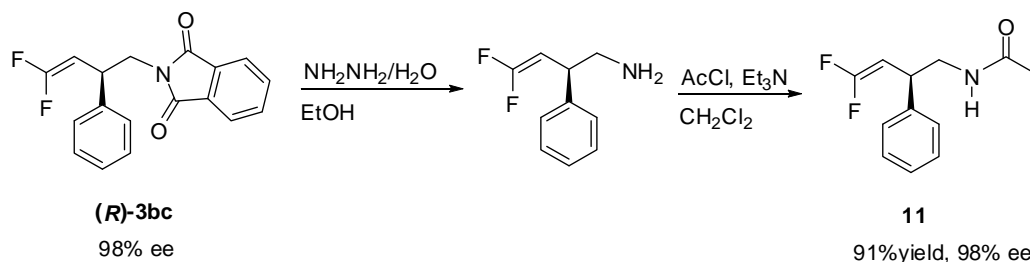

To a solution of (*R*)-**3bc** (98% ee, 62.7 mg, 0.20 mmol), which was obtained in entry 4 in Table 2, in EtOH (2 mL) was added  $\text{NH}_2\text{NH}_2$  (80% in  $\text{H}_2\text{O}$ , 61  $\mu\text{L}$ , 1.0 mmol). After stirring at 80  $^\circ\text{C}$  for 3 h, the mixture was diluted with  $\text{Et}_2\text{O}$  (2 mL). The precipitated solid was filtered off and the filter cake was washed with  $\text{Et}_2\text{O}$ . The filtrate was concentrated on a rotary evaporator. To a solution of the residue in THF (2 mL) was added  $\text{LiOH}\cdot\text{H}_2\text{O}$  (12.6 mg, 0.30 mmol) in  $\text{H}_2\text{O}$  (2 mL), and the mixture was stirred at room temperature for 2 h. The reaction mixture was extracted with dichloromethane (20 mL x 3). The organic layers were combined, washed with brine and water, and dried over anhydrous  $\text{Na}_2\text{SO}_4$ . Filtration and removal of solvent gave

the crude primary amine.

The crude primary amine obtained above was dissolved in 10 mL dichloromethane and the solution was cooled to 0 °C. AcCl (17.3 mg, 0.22 mmol) and Et<sub>3</sub>N (40.4 mg, 0.4 mmol) were added dropwise sequently. After addition, the reaction mixture was warmed to room temperature and kept stirring for 10 h. After removal of solvent, the residue was purified by flash chromatography on silica gel (ethyl acetate/hexane = 1/3) to give **11** (41.0 mg, 91% yield based on (*R*)-**3bc**) as a slight yellow oil.

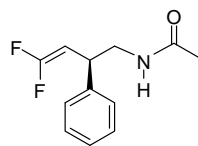

**Compound (*R*)-11.** The ee was measured by HPLC (Daicel Chiralpak IC column), 2-propanol/hexane = 5/95, flow 2.0 mL/min, 254 nm, *t*<sub>1</sub> = 10.8 min (major), *t*<sub>2</sub> = 12.9 min (minor). [ $\alpha$ ]<sub>D</sub><sup>25</sup> –21.5 (*c* 1.18, CHCl<sub>3</sub>) for 98% ee (*R*). <sup>19</sup>F NMR (CDCl<sub>3</sub>, 377 MHz)  $\delta$  –88.0 (dd, *J* = 42 Hz, 25 Hz, 1F), –86.7 (d, *J* = 42 Hz, 1F). <sup>1</sup>H NMR (CDCl<sub>3</sub>, 400 MHz)  $\delta$  1.96 (s, 3H), 3.49–3.58 (m, 2H), 3.72 (br q, *J* = 8.4 Hz, 1H), 4.46 (ddd, *J* = 24.6 Hz, 10.0 Hz, 2.3 Hz, 1H), 5.63 (br s, 1H), 7.23 (d, *J* = 7.2 Hz, 2H), 7.29 (t, *J* = 7.2 Hz, 1H), 7.36 (t, *J* = 7.2 Hz, 2H). <sup>13</sup>C NMR (CDCl<sub>3</sub>, 100 MHz)  $\delta$  23.2, 39.8 (d, *J* = 5 Hz), 44.6, 79.8 (dd, *J* = 22 Hz, 19 Hz), 127.26, 127.29, 128.9, 140.7, 156.6 (t, *J* = 287 Hz), 170.2. HRMS (ESI) calcd for C<sub>12</sub>H<sub>14</sub>NOF<sub>2</sub> [M+H]<sup>+</sup> 226.1043, found 226.1040.

## 9. Reference

- [1] Giordano, G.; Crabtree, R. H. *Inorg. Synth.* **1990**, 28, 88.
- [2] Ent, A.; Onderdelinden, A. L. *Inorg. Synth.* **1990**, 28, 90.
- [3] Nishimura, T.; Kumamoto, H.; Nagaosa, M.; Hayashi, T. *Chem. Commun.* **2009**, 5713.
- [4] Tokunaga, N.; Otomaru, Y.; Okamoto, K.; Ueyama, K.; Shintani, R.; Hayashi, T. *J. Am. Chem. Soc.* **2004**, 126, 13584.
- [5] Dou, X.; Huang, Y.; Hayashi, T. *Angew. Chem. Int. Ed.* **2015**, 54, 7891.
- [6] Nishimura, T.; Noishiki, A.; Tsui, G. C.; Hayashi, T. *J. Am. Chem. Soc.* **2012**,

134, 5056.

- [7] So, C. M.; Kume, S.; Hayashi, T. *J. Am. Chem. Soc.* **2013**, *135*, 10990.
- [8] Wang, B. L.; Yu, F.; Qiu, X.-L.; Jiang, Z.-X.; Qing, F.-L. *J. Fluorine Chem.* **2006**, *127*, 580.
- [9] Forcellini, E.; Hemelaere, R.; Desroches, J.; Paquin, J.-F. *J. Fluorine Chem.* **2015**, *180*, 216.
- [10] Omote, M.; Tanaka, M.; Ikeda, A.; Nomura, S.; Tarui, A.; Sato, K.; Ando, A. *Org. Lett.* **2012**, *14*, 2286.
- [11] Liu, N.; Wang, H.-Y.; Zhang, W.; Jia, Z.-H.; Guzei, I.; Xu, H.-D.; Tang, W. *Chirality* **2013**, *25*, 805.
- [12] Mizuta, S.; Galicia-Lopez, O.; Engle, K.; Verhoog, S.; Wheelhouse, K.; Rassias, G.; Gouverneur, V. *Chem. Eur. J.* **2012**, *18*, 8583.
- [13] Wang, F.; Wang, D.; Mu, X.; Chen, P.; Liu, G. *J. Am. Chem. Soc.* **2014**, *136*, 10202.

## 10. Data for X-ray crystal structure of (R)-3be

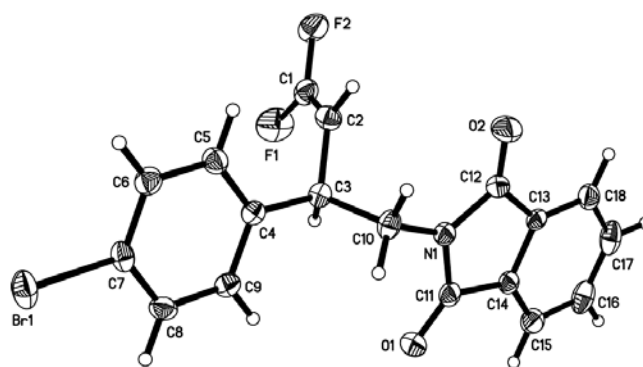

Figure S1. ORTEP illustration of (R)-**3be** with thermal ellipsoids drawn at 50% probability level.

**Table 1. Sample and crystal data for (R)-3be.**

|                  |                                                                  |
|------------------|------------------------------------------------------------------|
| Chemical formula | C <sub>18</sub> H <sub>12</sub> BrF <sub>2</sub> NO <sub>2</sub> |
| Formula weight   | 392.20 g/mol                                                     |

|                                            |                                                                                                                                    |                              |
|--------------------------------------------|------------------------------------------------------------------------------------------------------------------------------------|------------------------------|
| <b>Temperature</b>                         | 103(2) K                                                                                                                           |                              |
| <b>Wavelength</b>                          | 0.71073 Å                                                                                                                          |                              |
| <b>Crystal size</b>                        | 0.120 x 0.160 x 0.380 mm                                                                                                           |                              |
| <b>Crystal habit</b>                       | colorless block                                                                                                                    |                              |
| <b>Crystal system</b>                      | monoclinic                                                                                                                         |                              |
| <b>Space group</b>                         | P 1 21 1                                                                                                                           |                              |
| <b>Unit cell dimensions</b>                | a = 7.2467(3) Å                                                                                                                    | $\alpha = 90^\circ$          |
|                                            | b = 12.0275(4) Å                                                                                                                   | $\beta = 109.1021(19)^\circ$ |
|                                            | c = 9.5303(4) Å                                                                                                                    | $\gamma = 90^\circ$          |
| <b>Volume</b>                              | 784.92(5) Å <sup>3</sup>                                                                                                           |                              |
| <b>Z</b>                                   | 2                                                                                                                                  |                              |
| <b>Density (calculated)</b>                | 1.659 g/cm <sup>3</sup>                                                                                                            |                              |
| <b>Absorption coefficient</b>              | 2.650 mm <sup>-1</sup>                                                                                                             |                              |
| <b>F(000)</b>                              | 392                                                                                                                                |                              |
| <b>Theta range for data collection</b>     | 2.83 to 31.20°                                                                                                                     |                              |
| <b>Index ranges</b>                        | -10 ≤ h ≤ 10, -17 ≤ k ≤ 17, -13 ≤ l ≤ 13                                                                                           |                              |
| <b>Reflections collected</b>               | 17205                                                                                                                              |                              |
| <b>Independent reflections</b>             | 5034 [R(int) = 0.0531]                                                                                                             |                              |
| <b>Coverage of independent reflections</b> | 98.8%                                                                                                                              |                              |
| <b>Absorption correction</b>               | Multi-Scan                                                                                                                         |                              |
| <b>Max. and min. transmission</b>          | 0.7420 and 0.4320                                                                                                                  |                              |
| <b>Structure solution technique</b>        | direct methods                                                                                                                     |                              |
| <b>Structure solution program</b>          | XT, VERSION 2014/4                                                                                                                 |                              |
| <b>Refinement method</b>                   | Full-matrix least-squares on F <sup>2</sup>                                                                                        |                              |
| <b>Refinement program</b>                  | SHELXL-2014/7 (Sheldrick, 2014)                                                                                                    |                              |
| <b>Function minimized</b>                  | $\Sigma w(F_o^2 - F_c^2)^2$                                                                                                        |                              |
| <b>Data / restraints / parameters</b>      | 5034 / 1 / 217                                                                                                                     |                              |
| <b>Goodness-of-fit on F<sup>2</sup></b>    | 0.905                                                                                                                              |                              |
| <b>Final R indices</b>                     | 3917 data;<br>I > 2σ(I)                                                                                                            | R1 = 0.0353, wR2 = 0.0633    |
|                                            | all data                                                                                                                           | R1 = 0.0576, wR2 = 0.0701    |
| <b>Weighting scheme</b>                    | w = 1/[σ <sup>2</sup> (F <sub>o</sub> <sup>2</sup> )]<br>where P = (F <sub>o</sub> <sup>2</sup> + 2F <sub>c</sub> <sup>2</sup> )/3 |                              |
| <b>Absolute structure parameter</b>        | -0.0(0)                                                                                                                            |                              |
| <b>Largest diff. peak and hole</b>         | 0.414 and -0.345 eÅ <sup>-3</sup>                                                                                                  |                              |
| <b>R.M.S. deviation from mean</b>          | 0.073 eÅ <sup>-3</sup>                                                                                                             |                              |

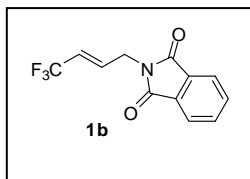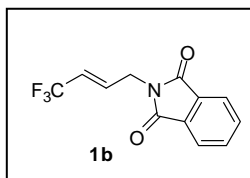



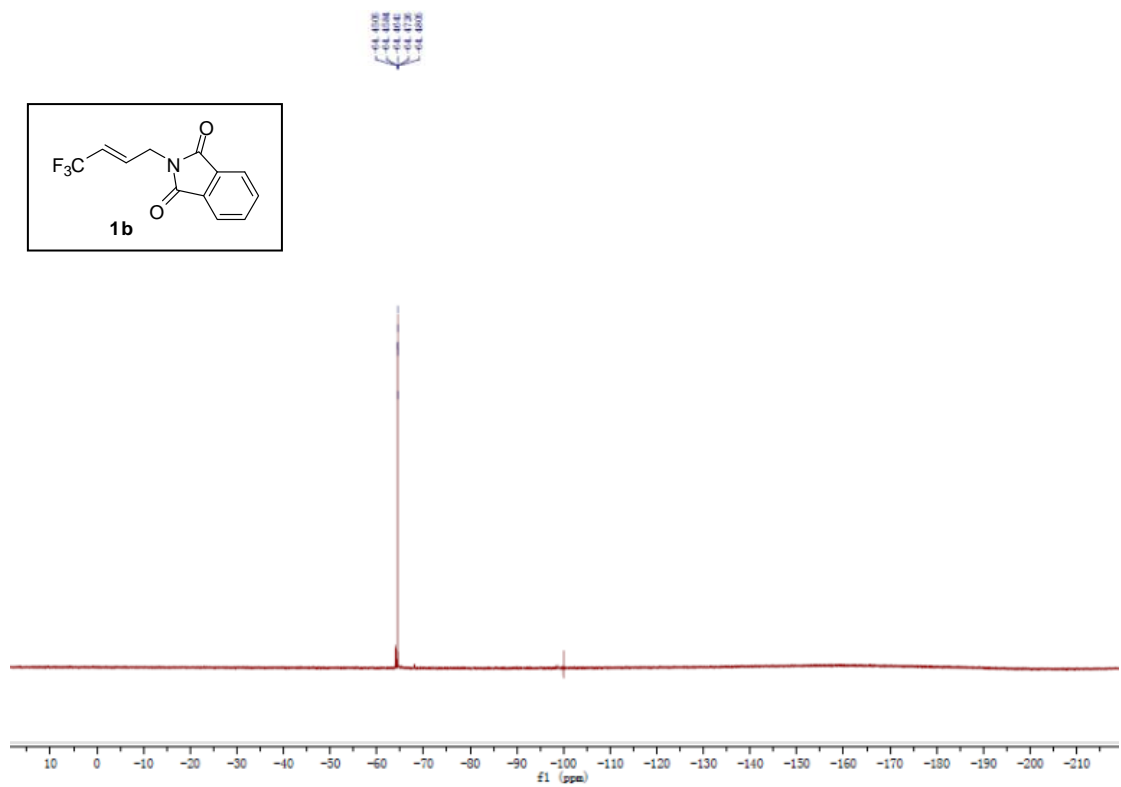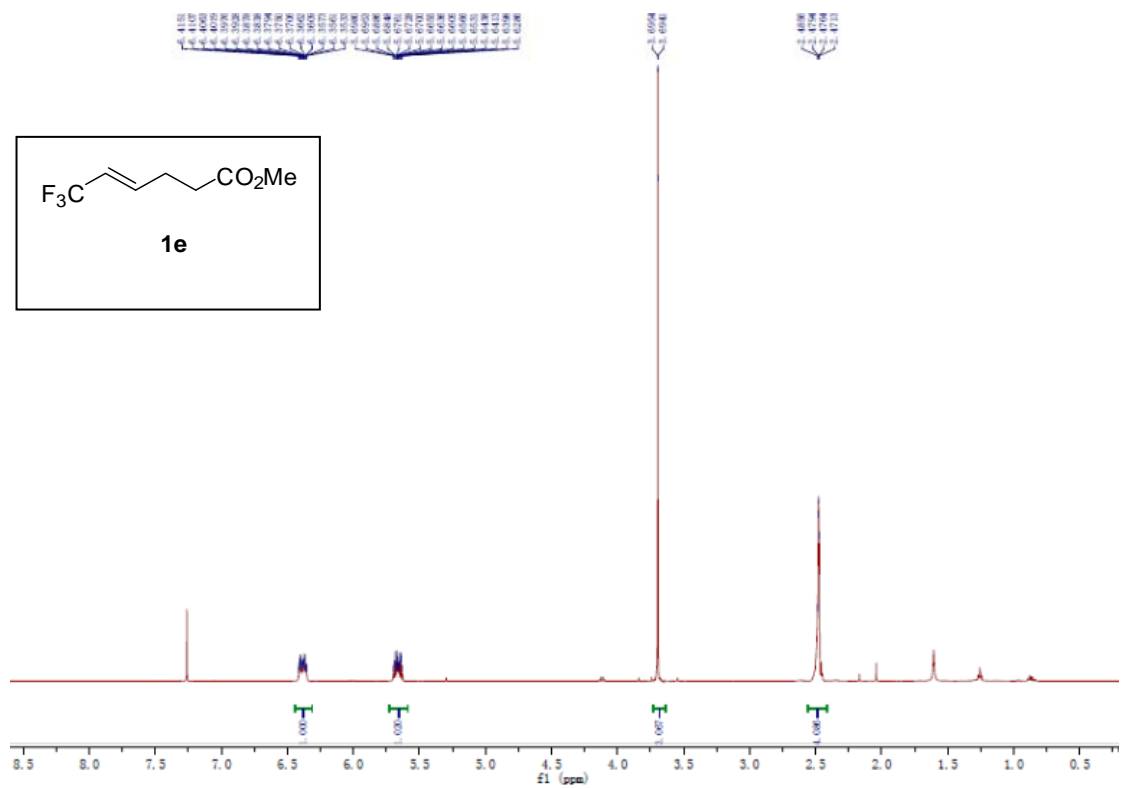

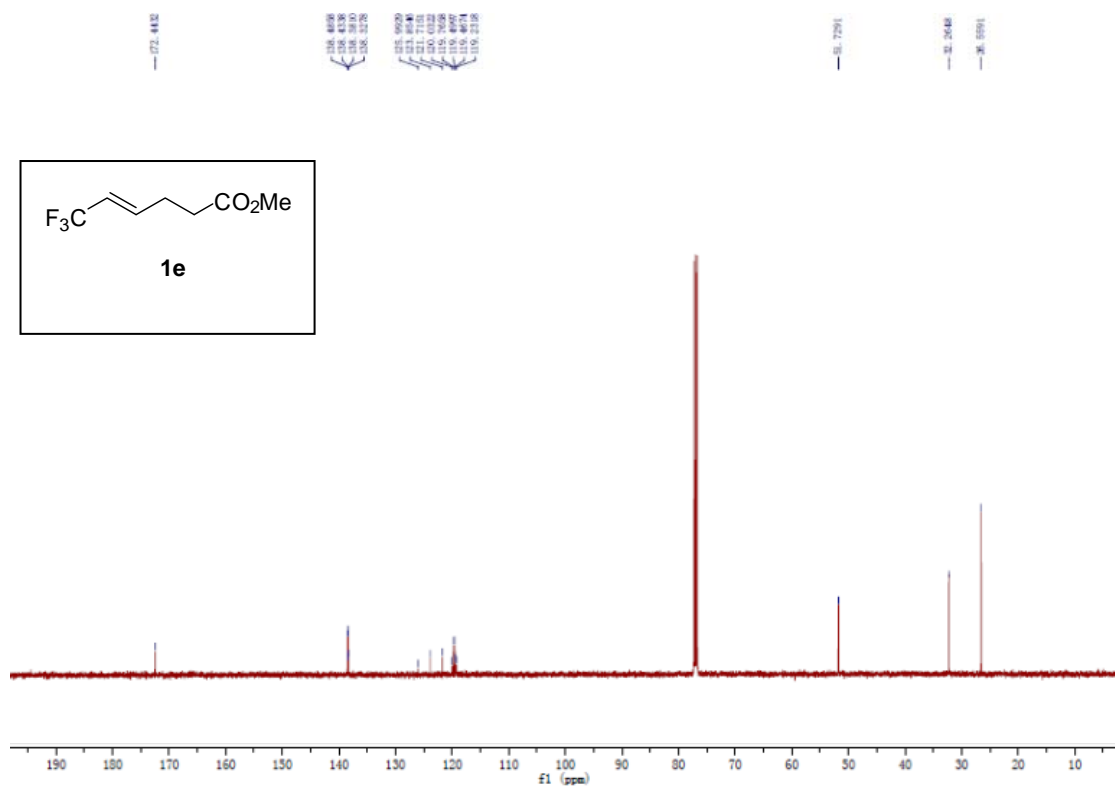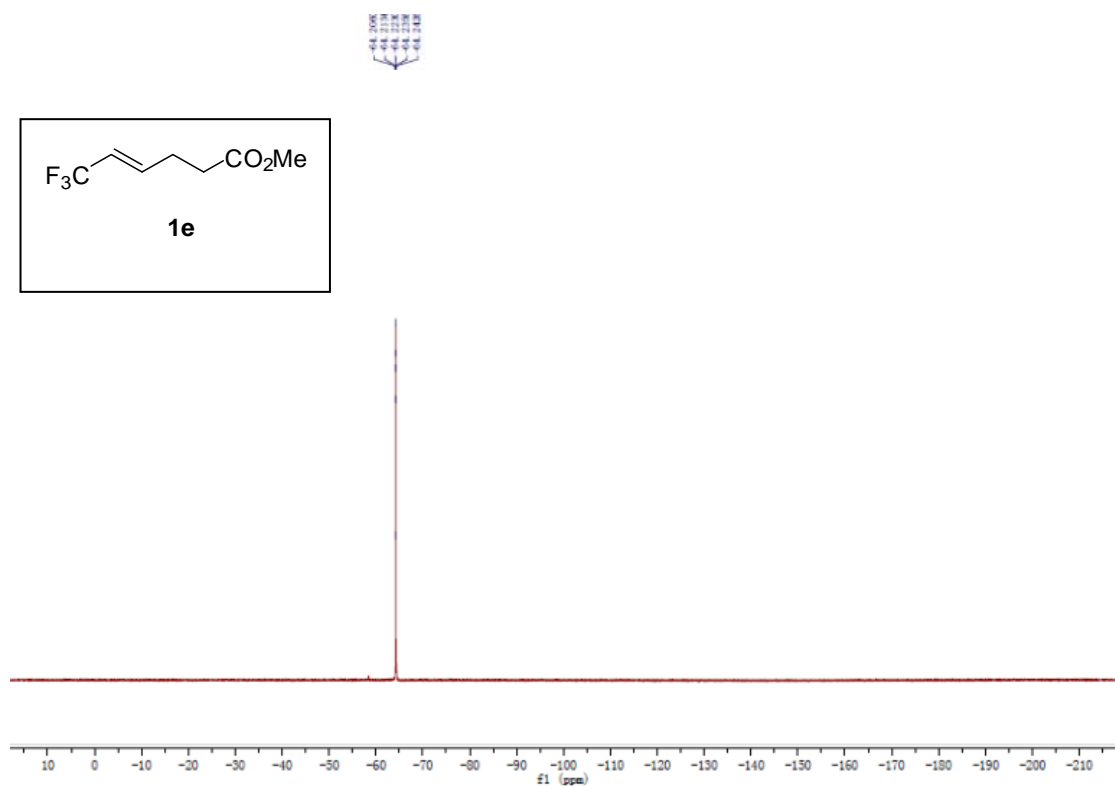

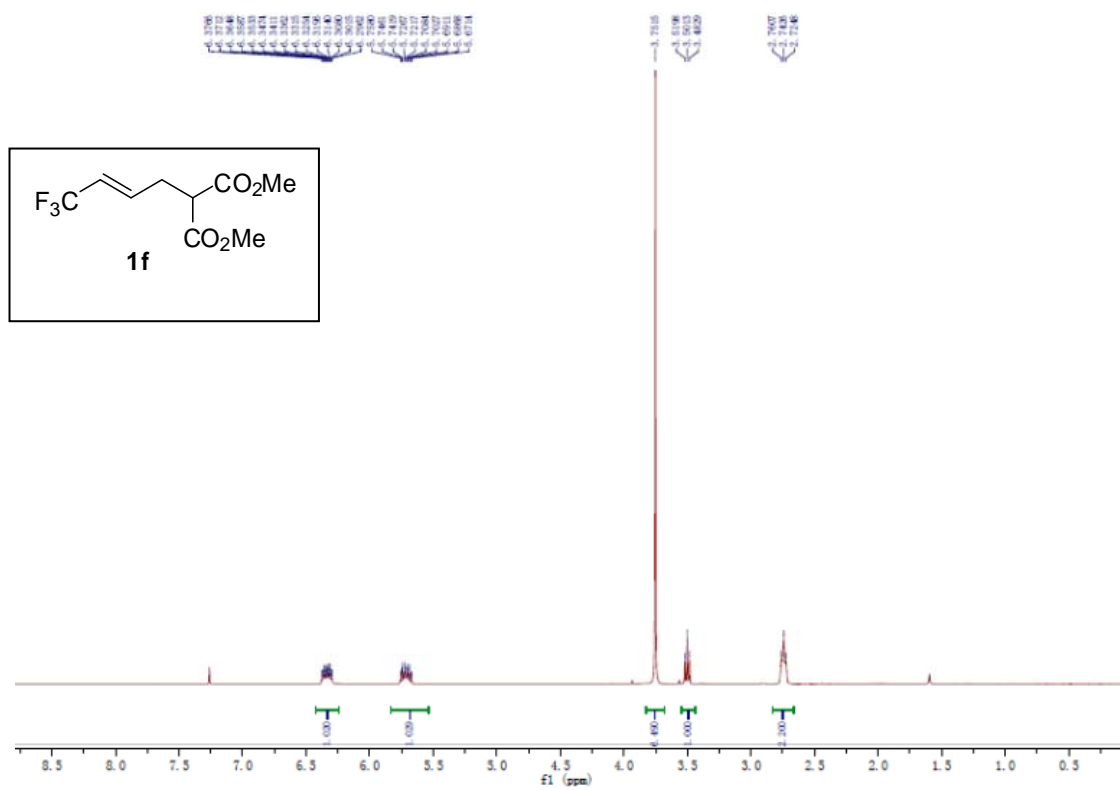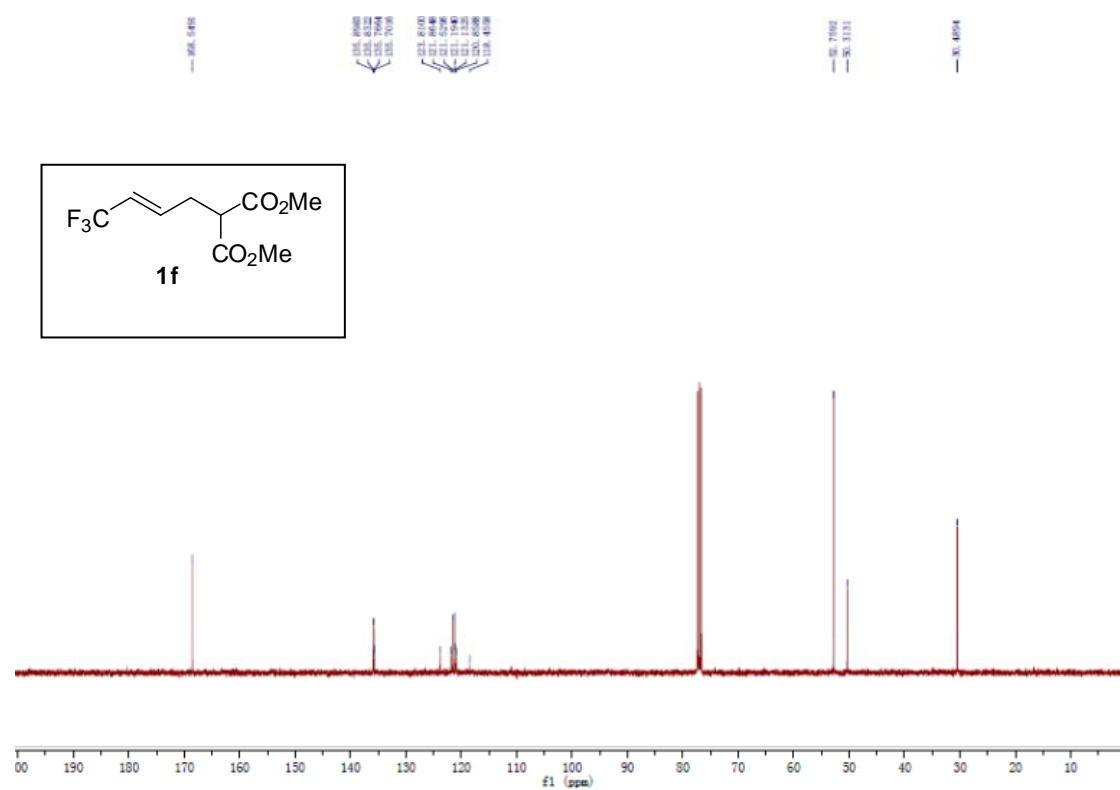

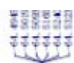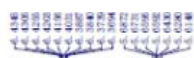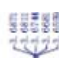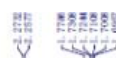

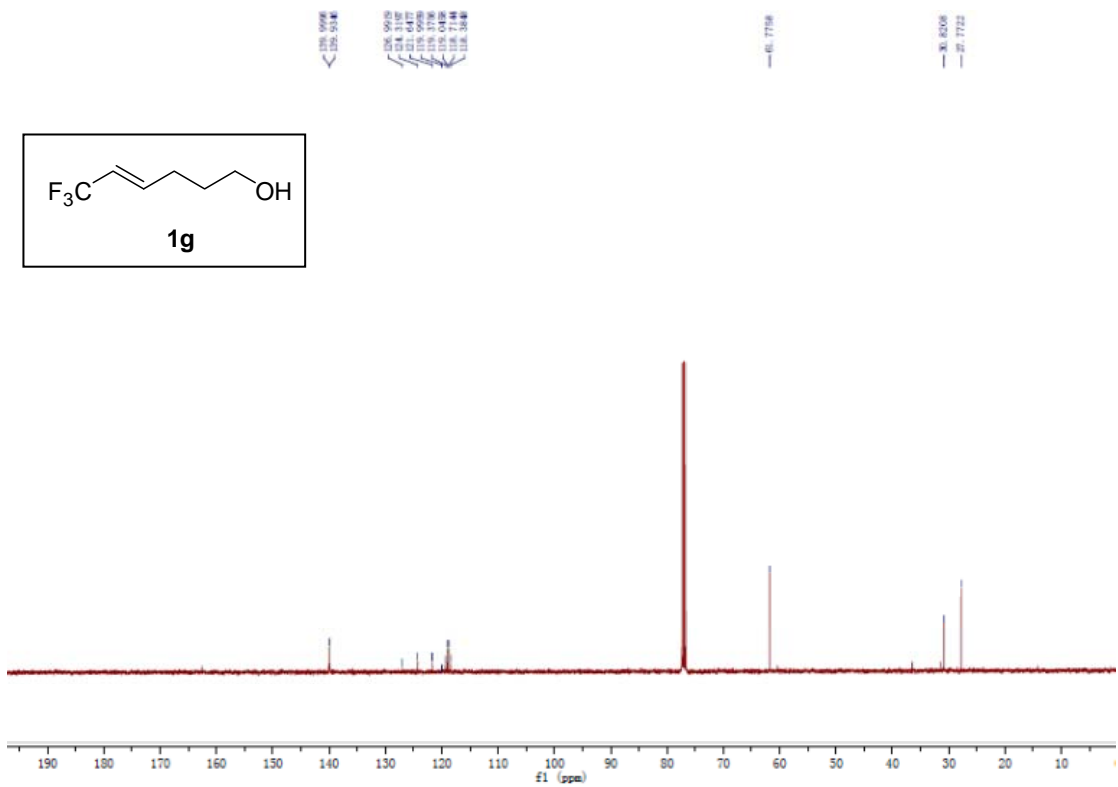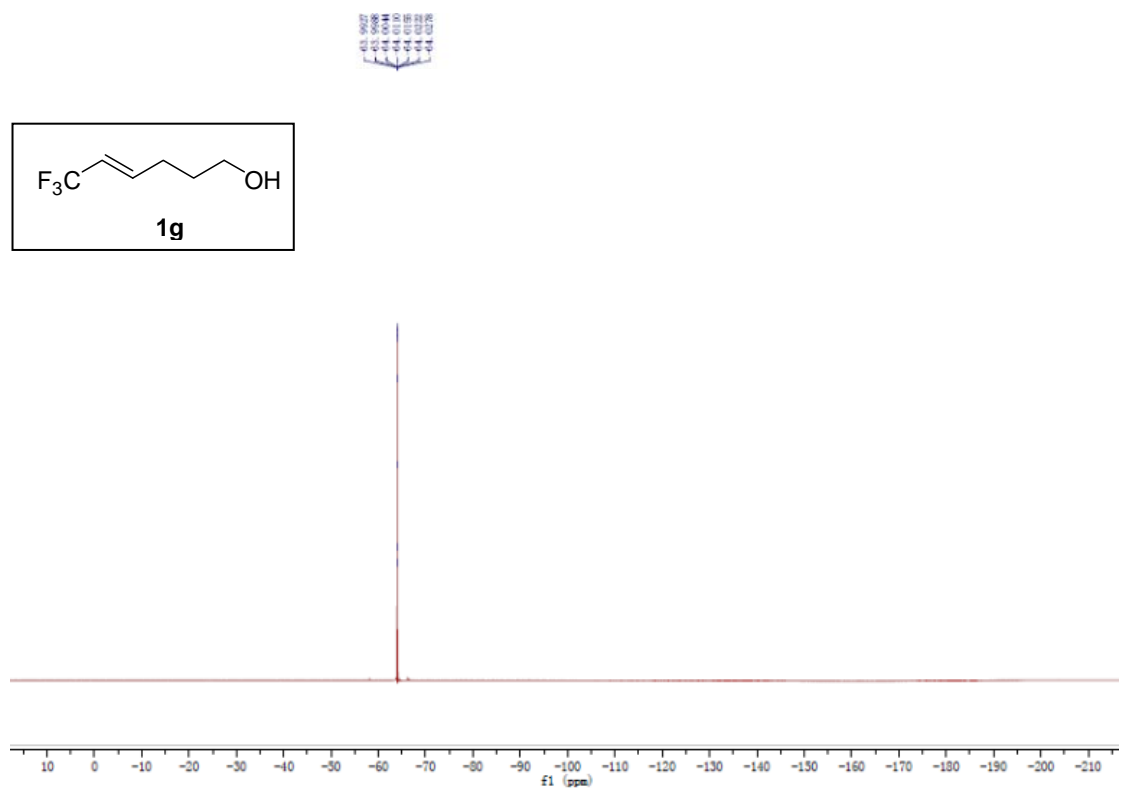

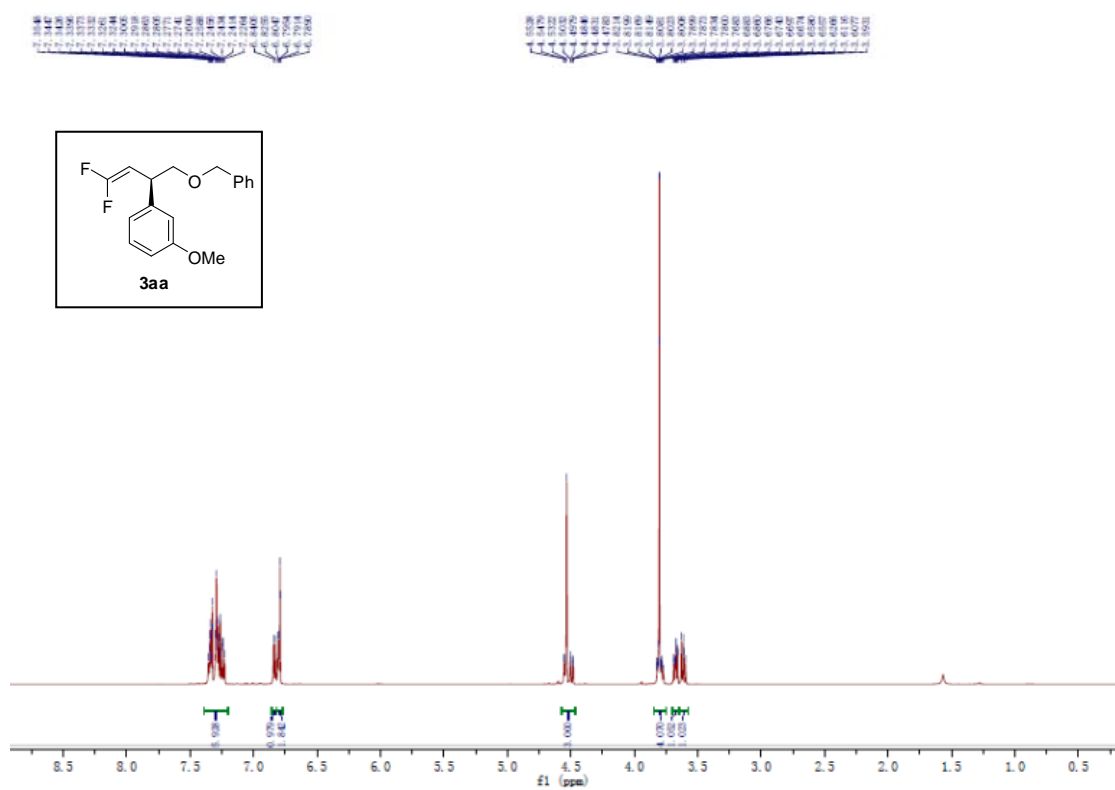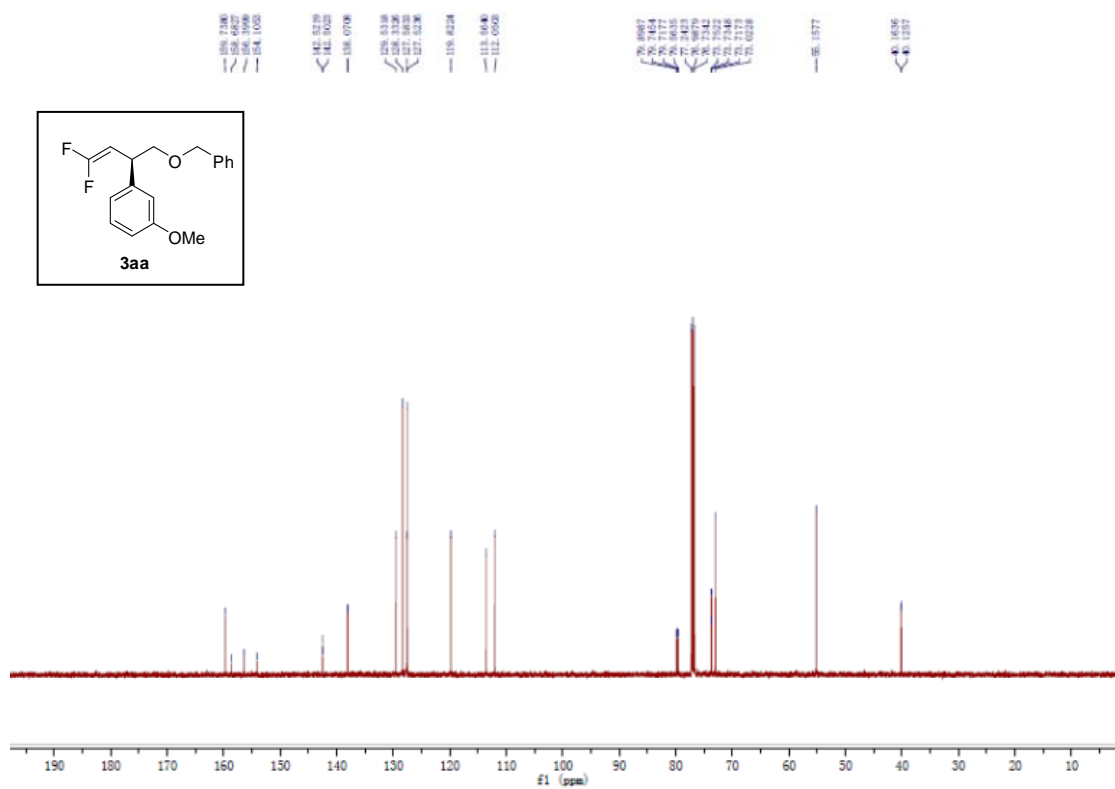

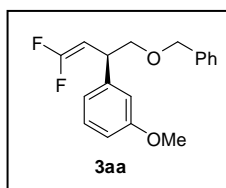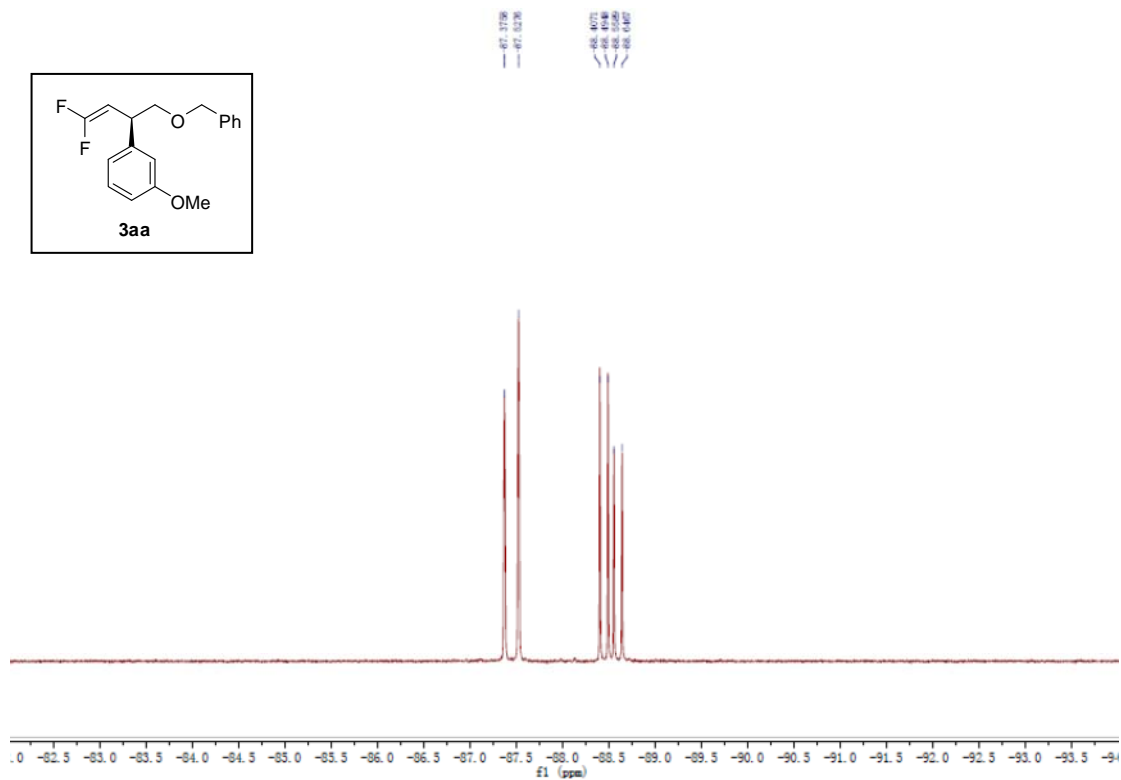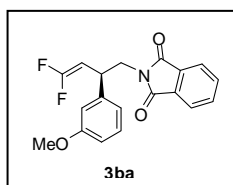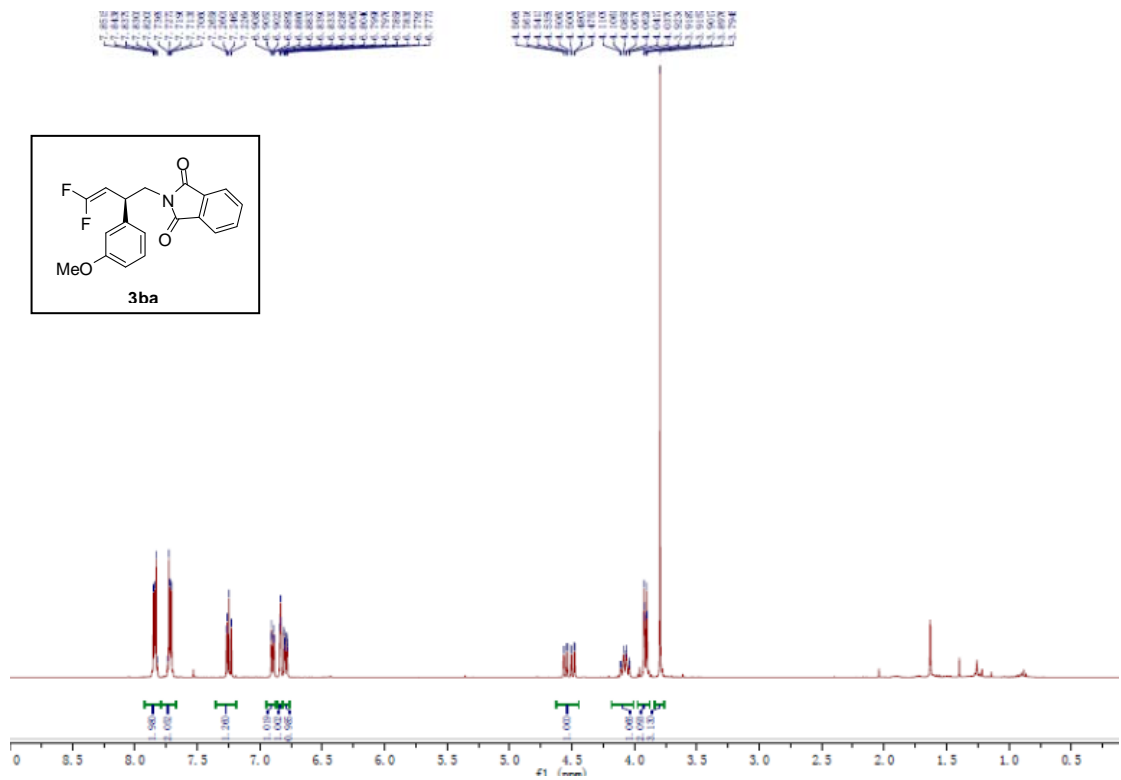

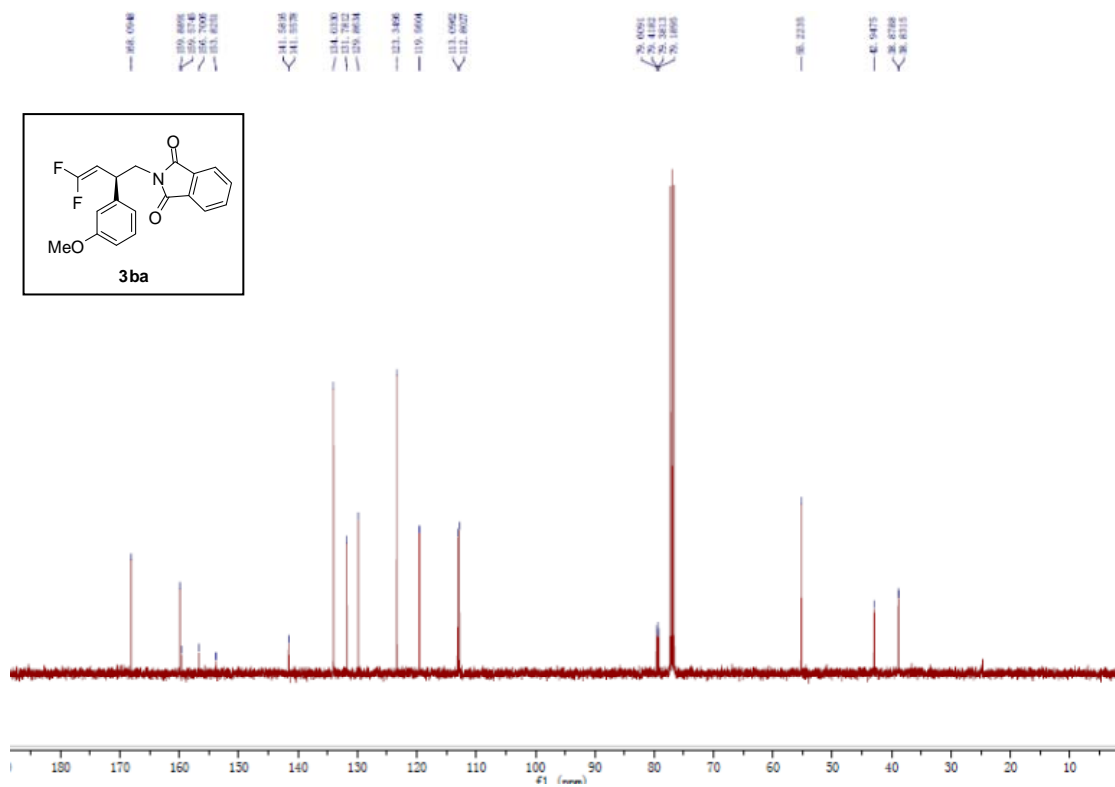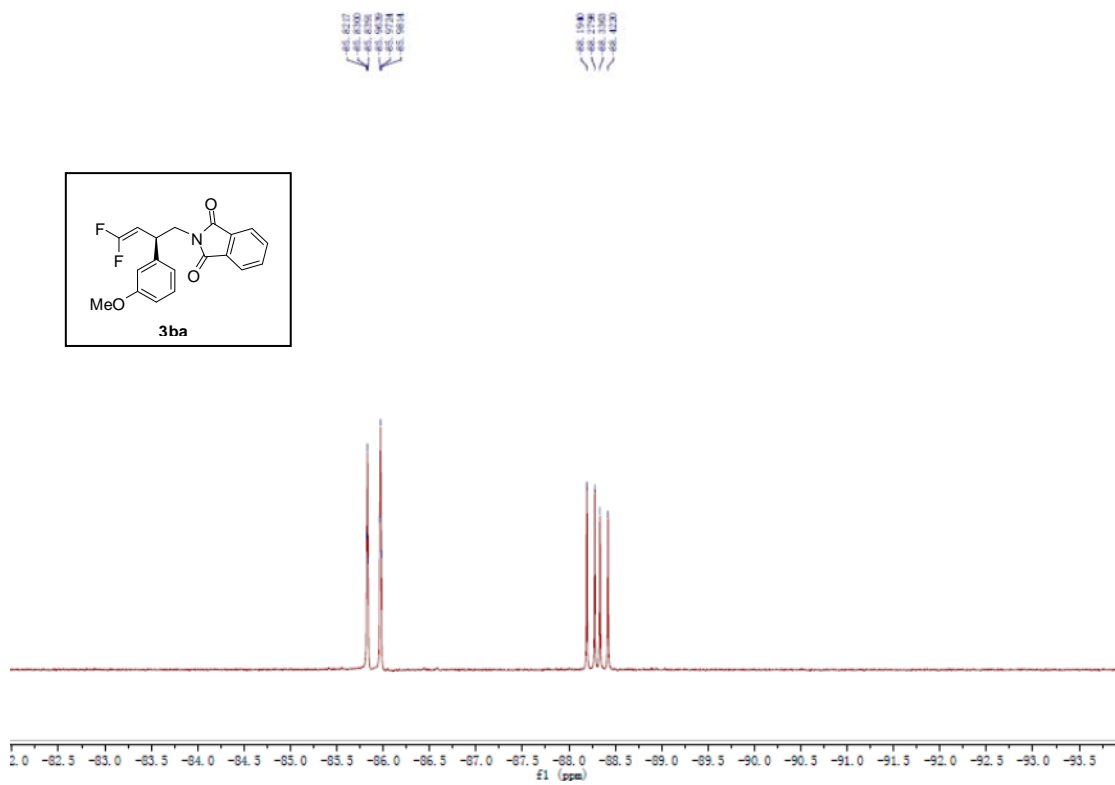



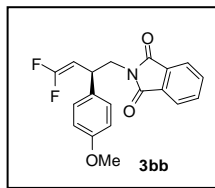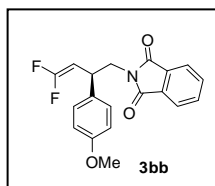

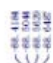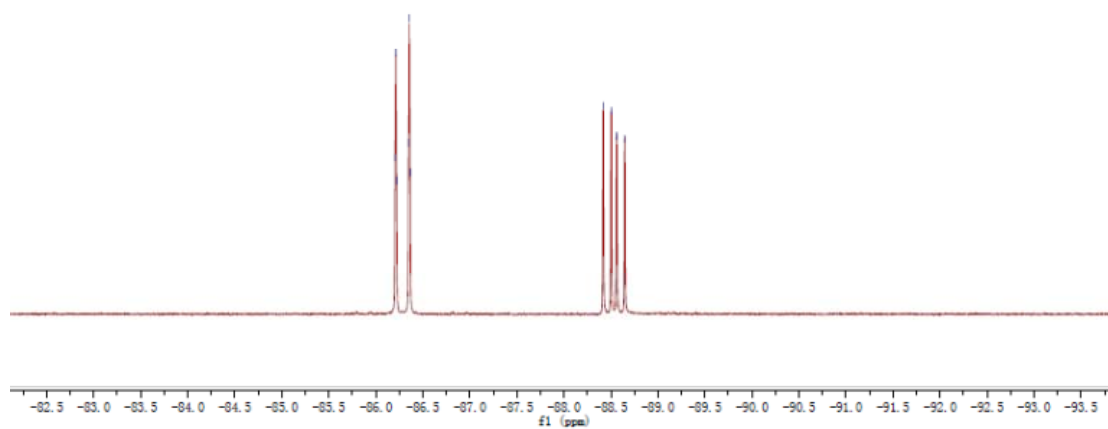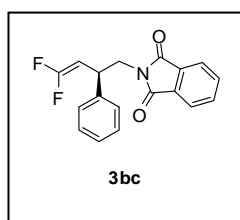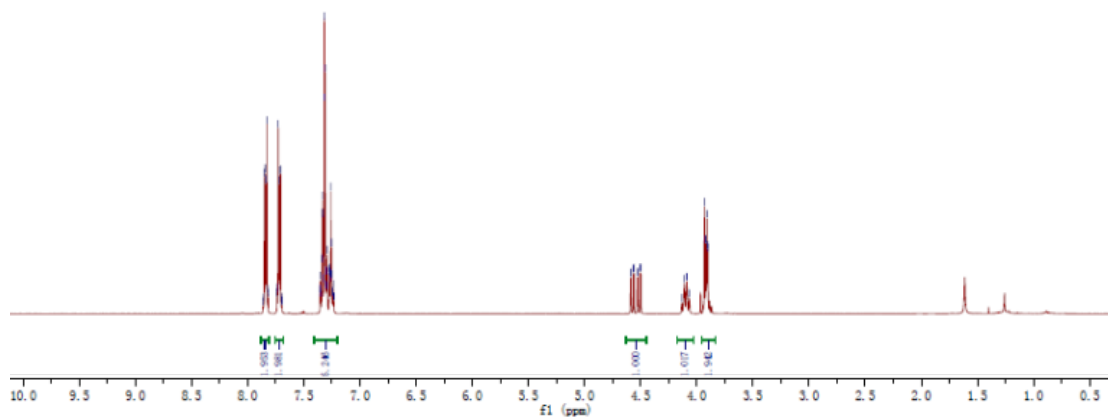

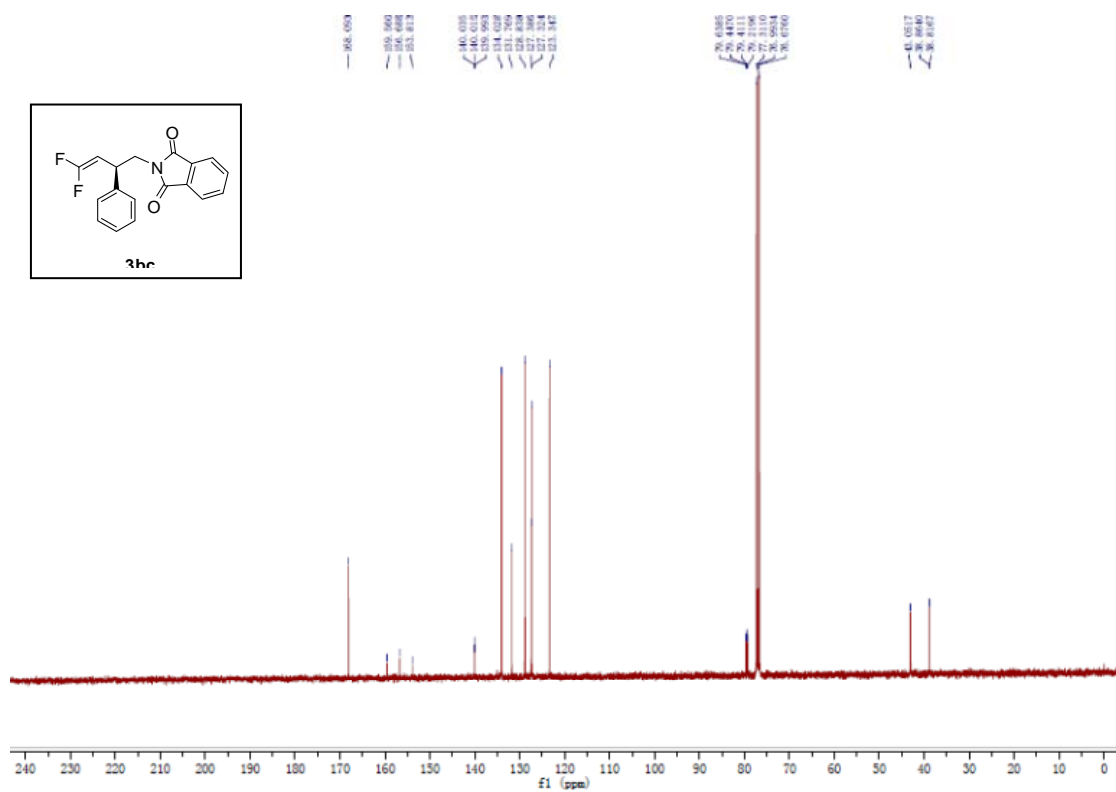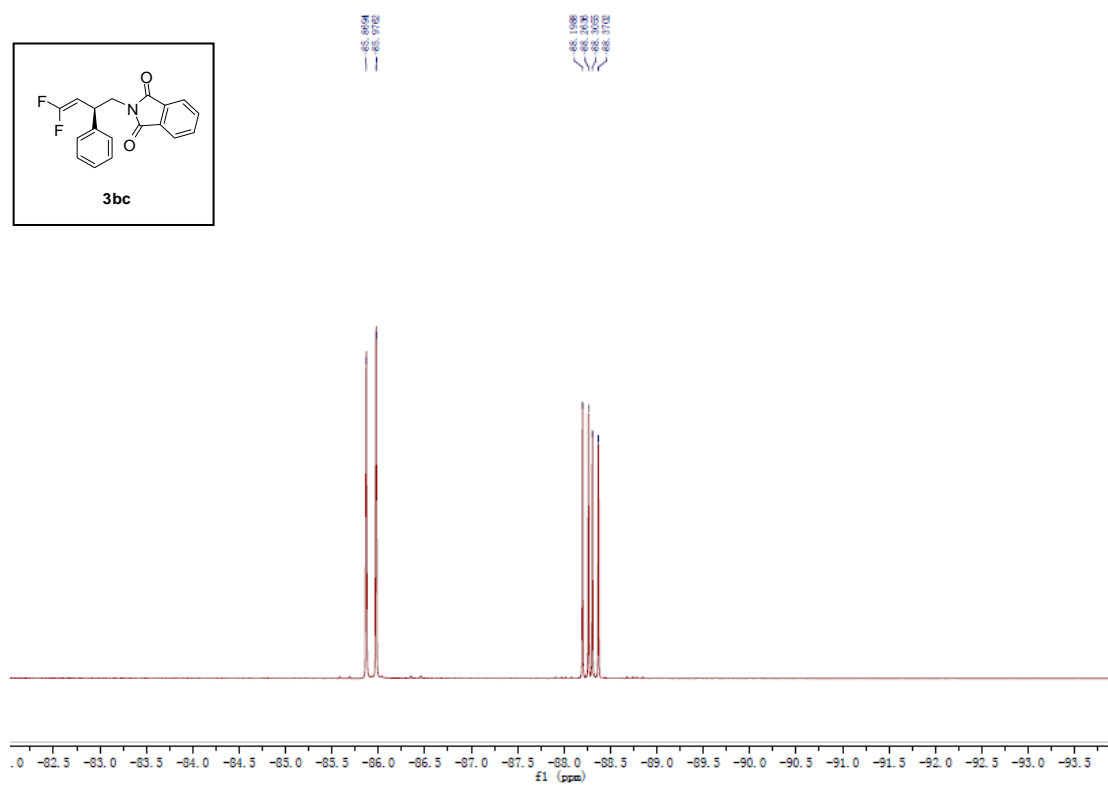

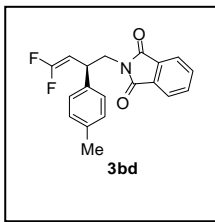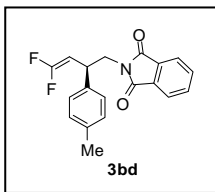

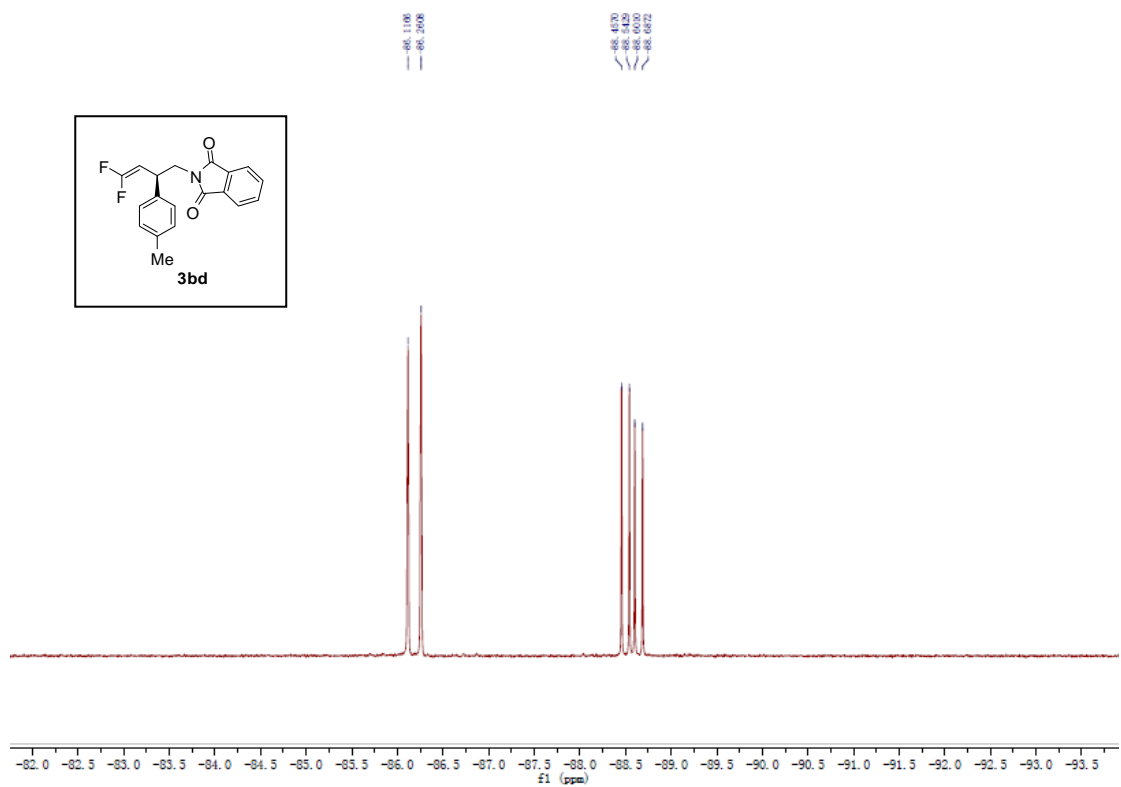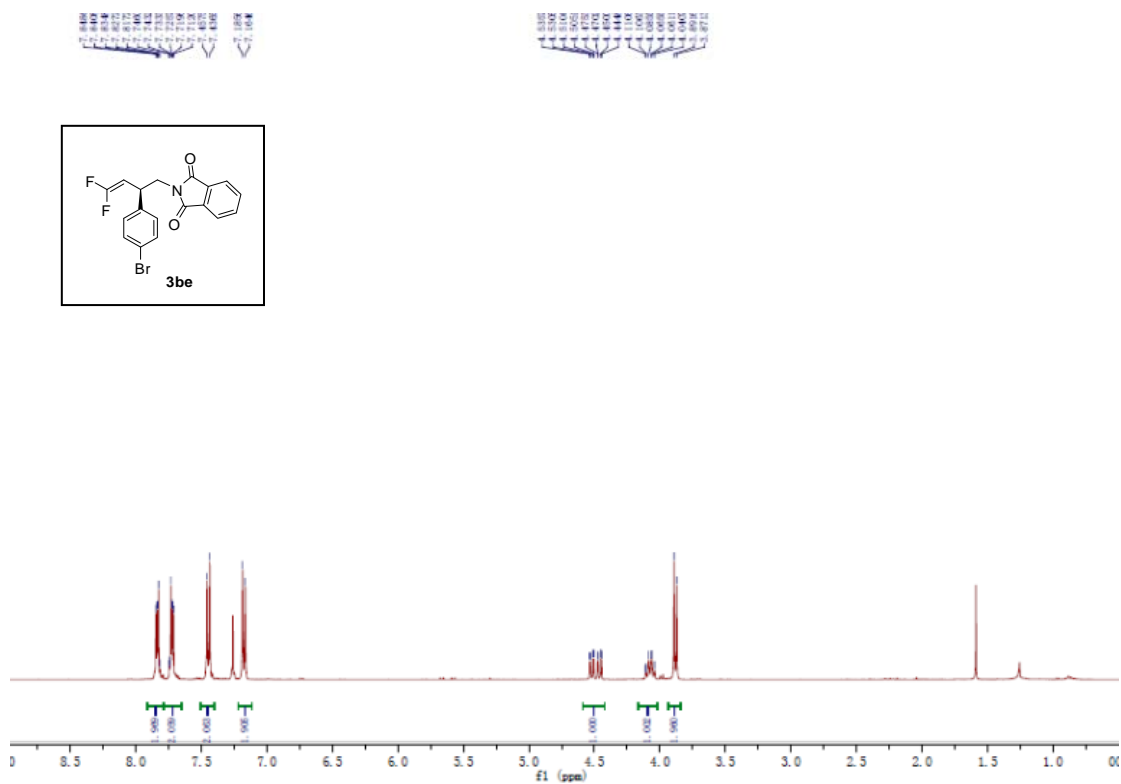

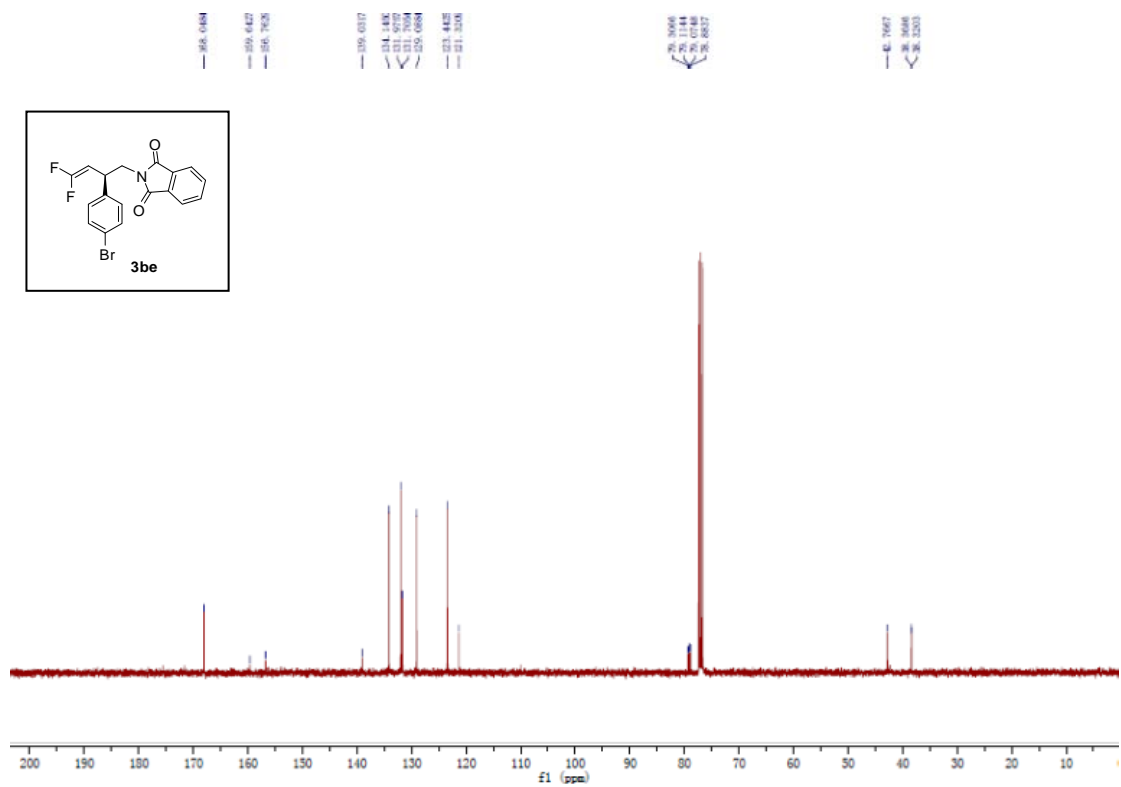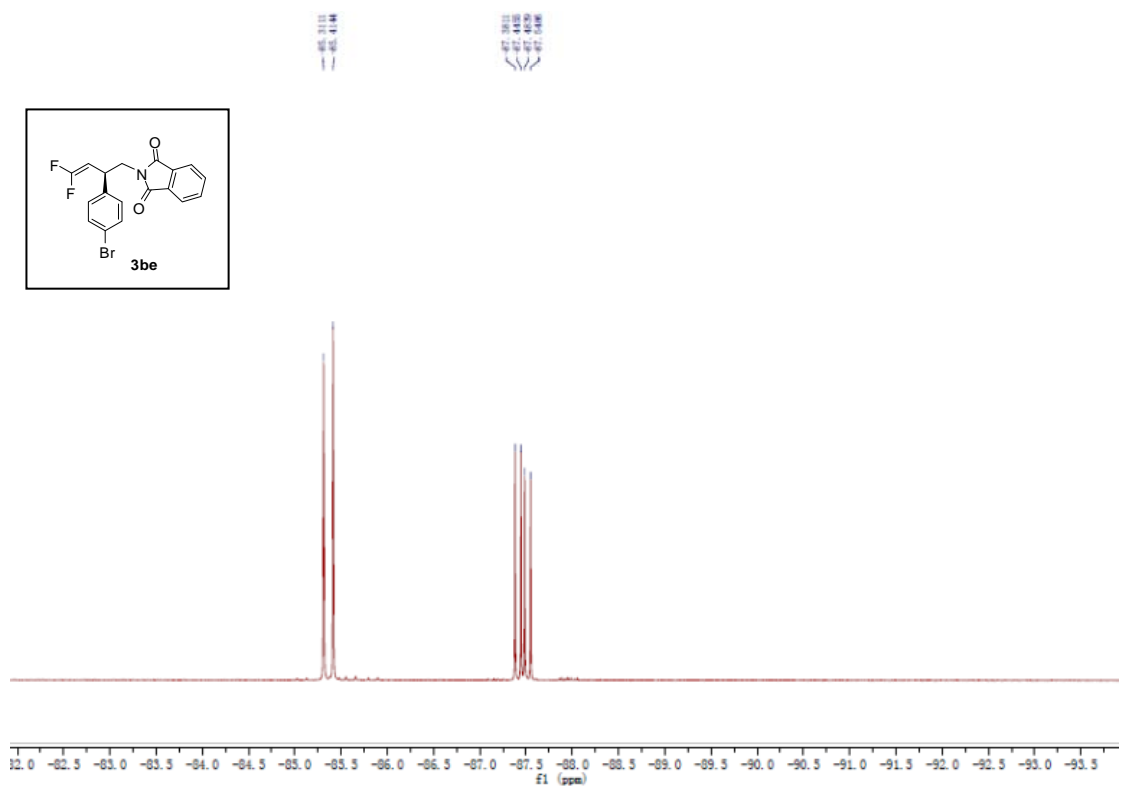

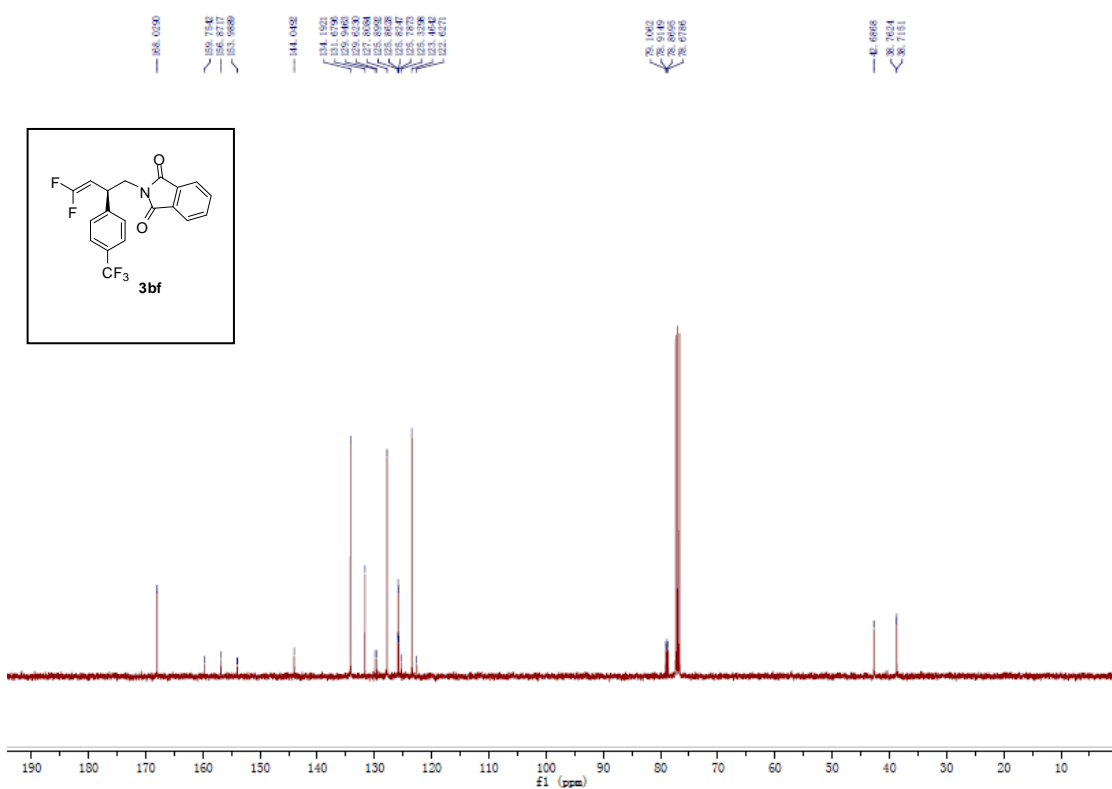

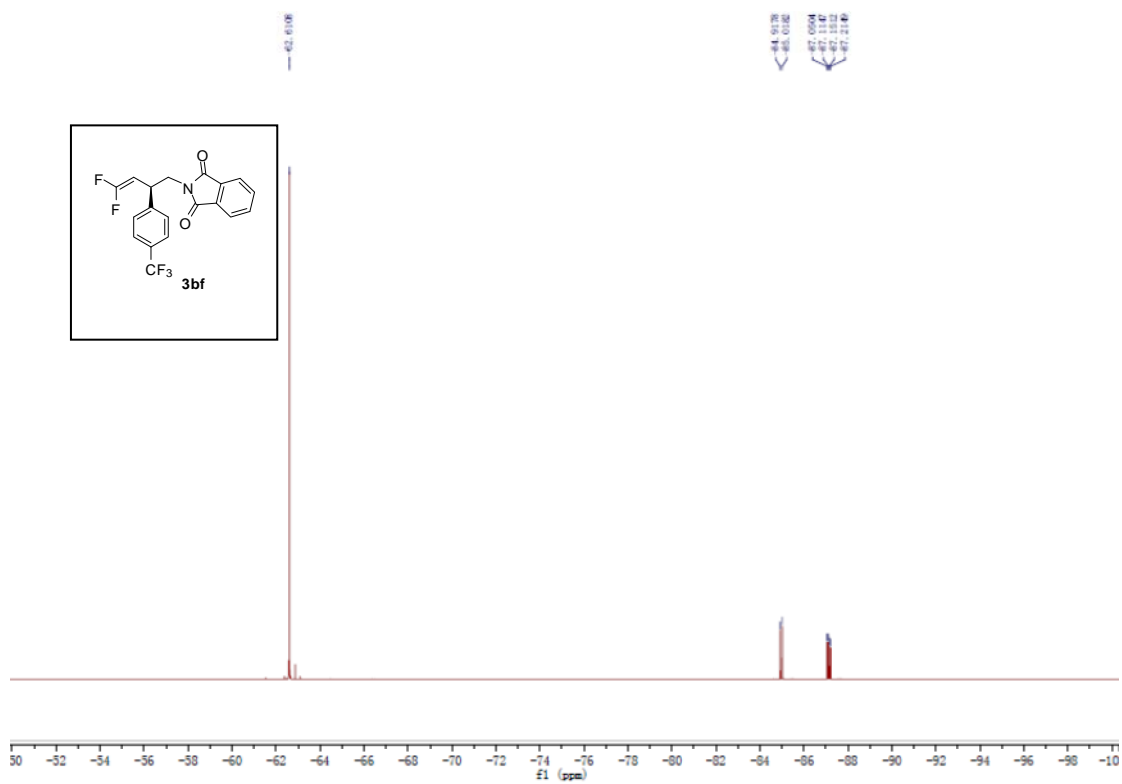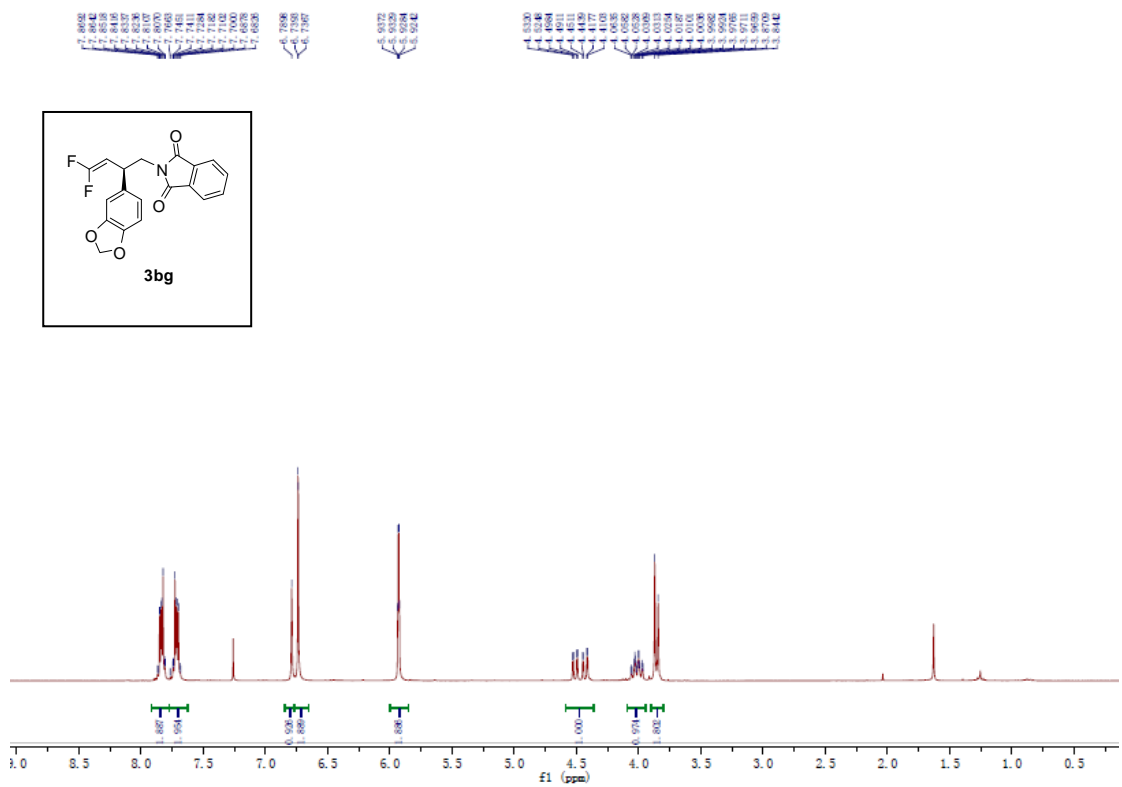



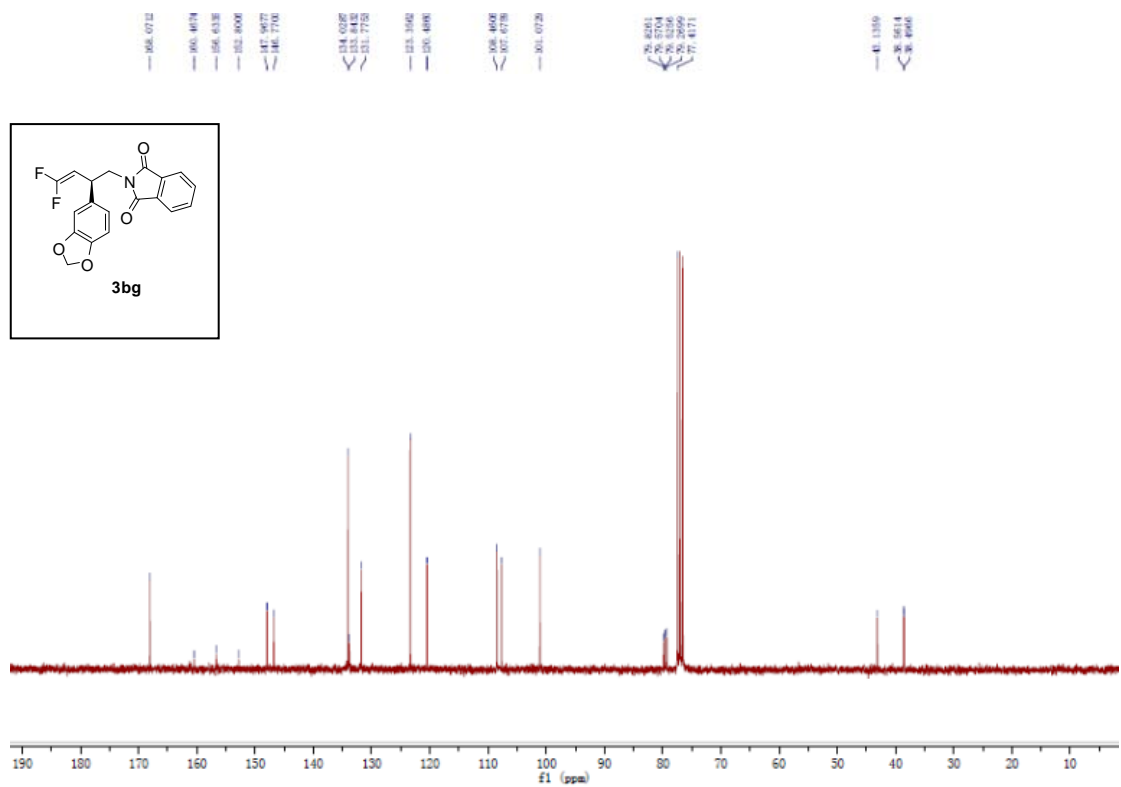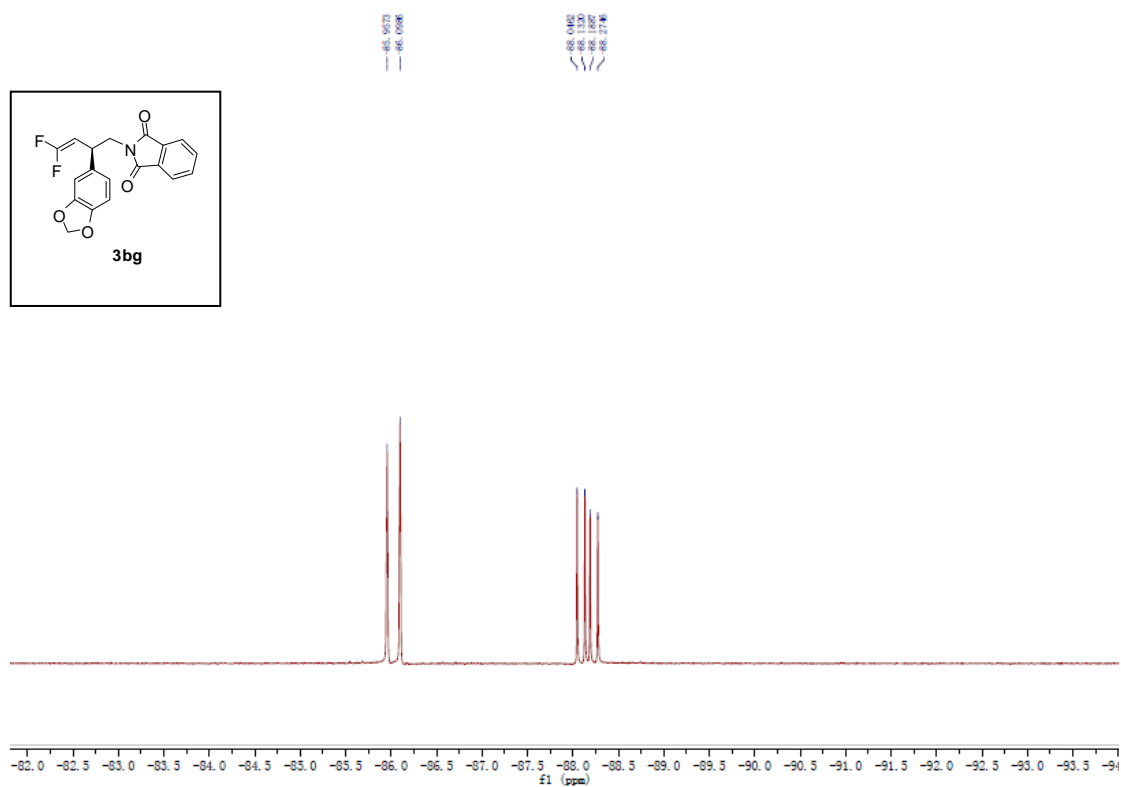

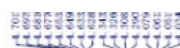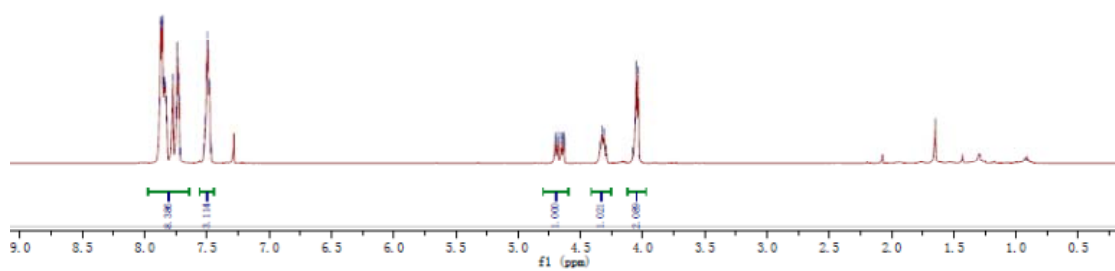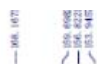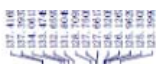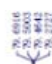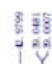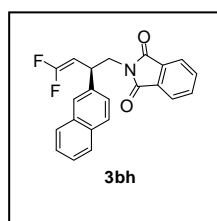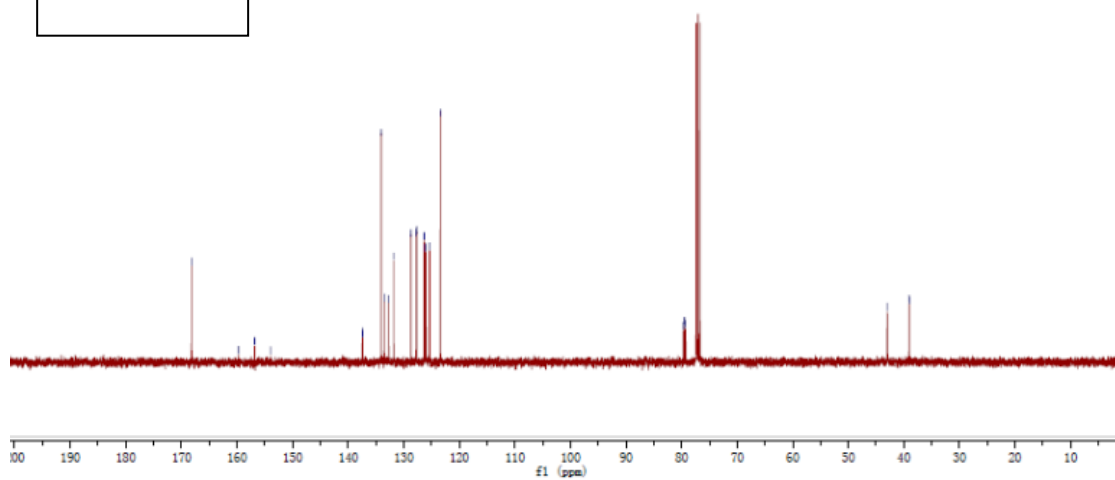

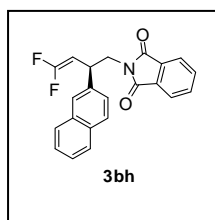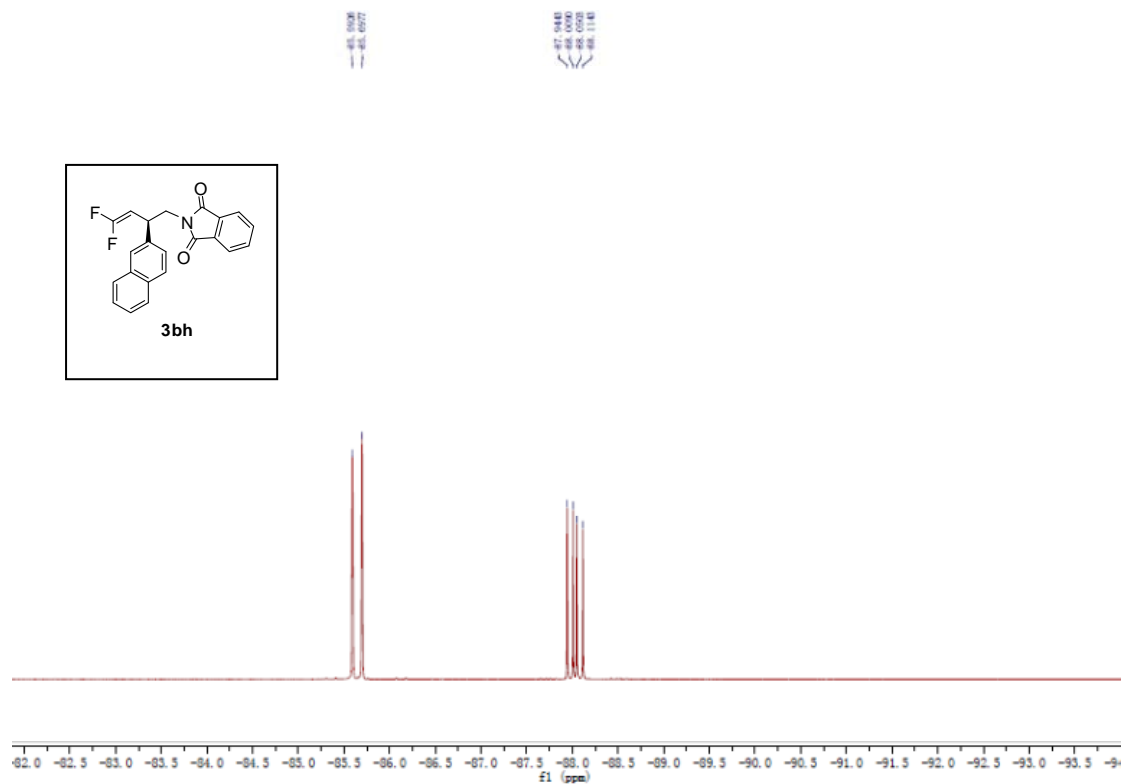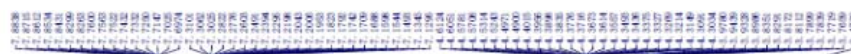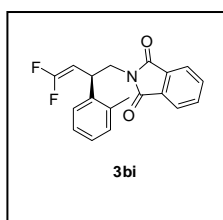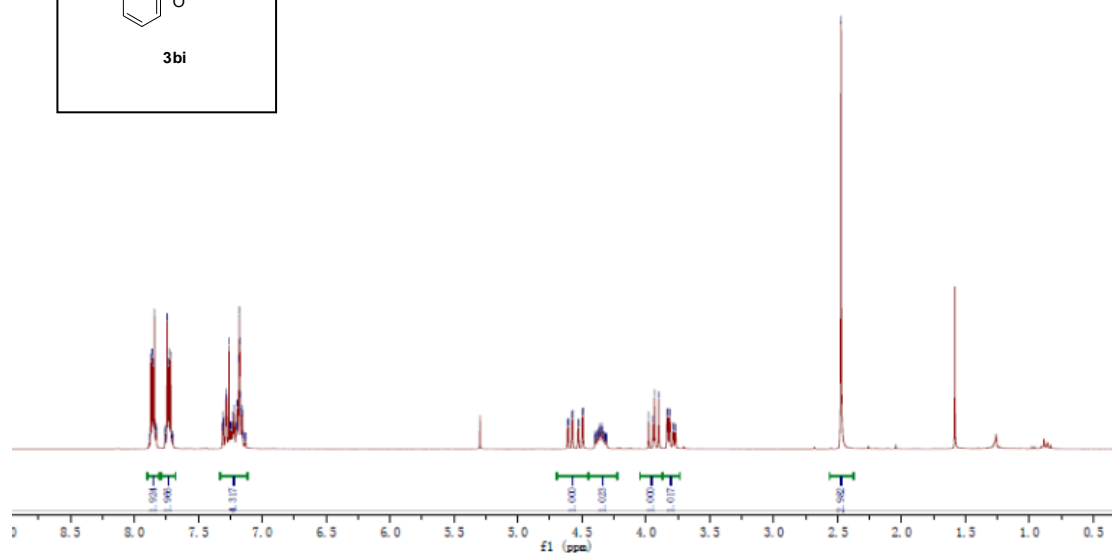

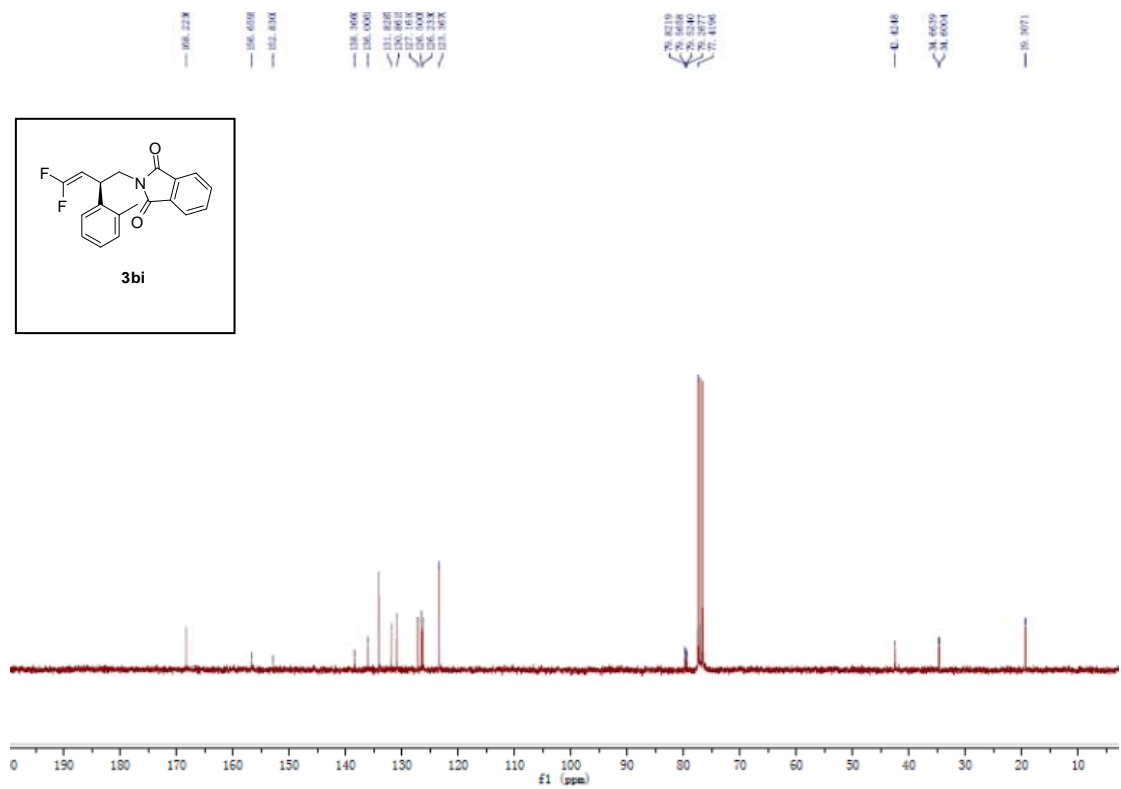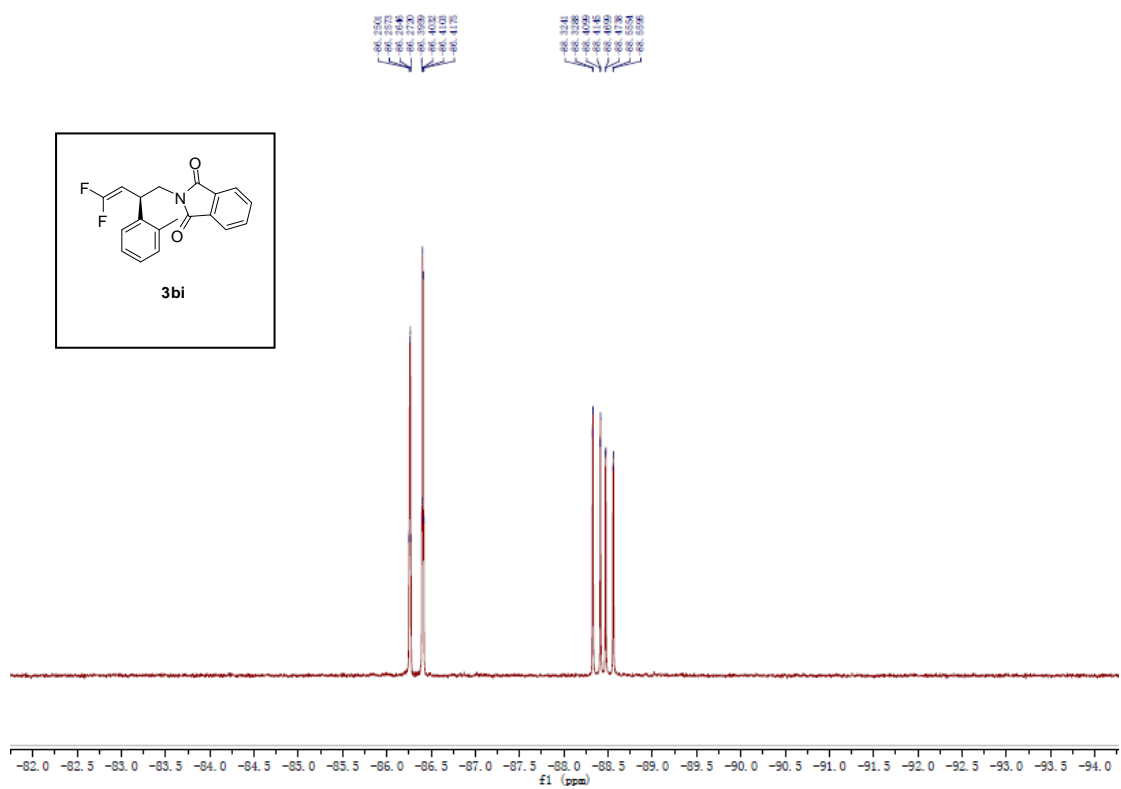

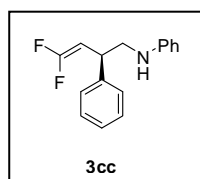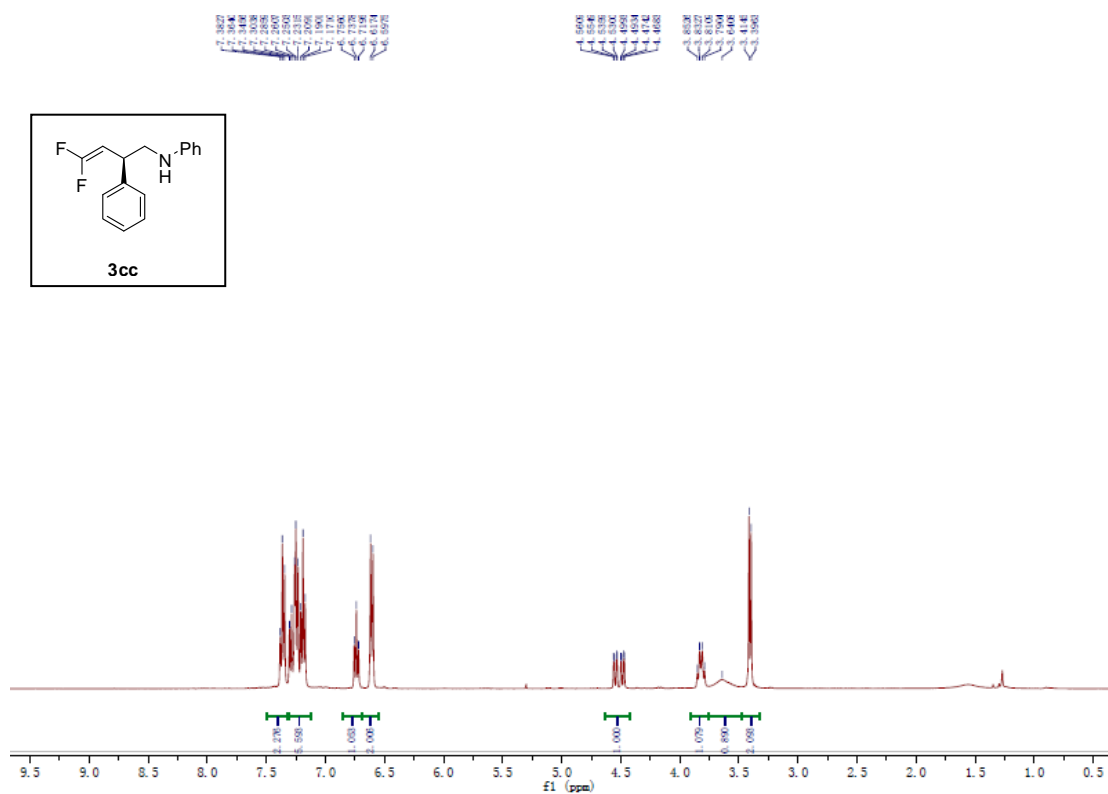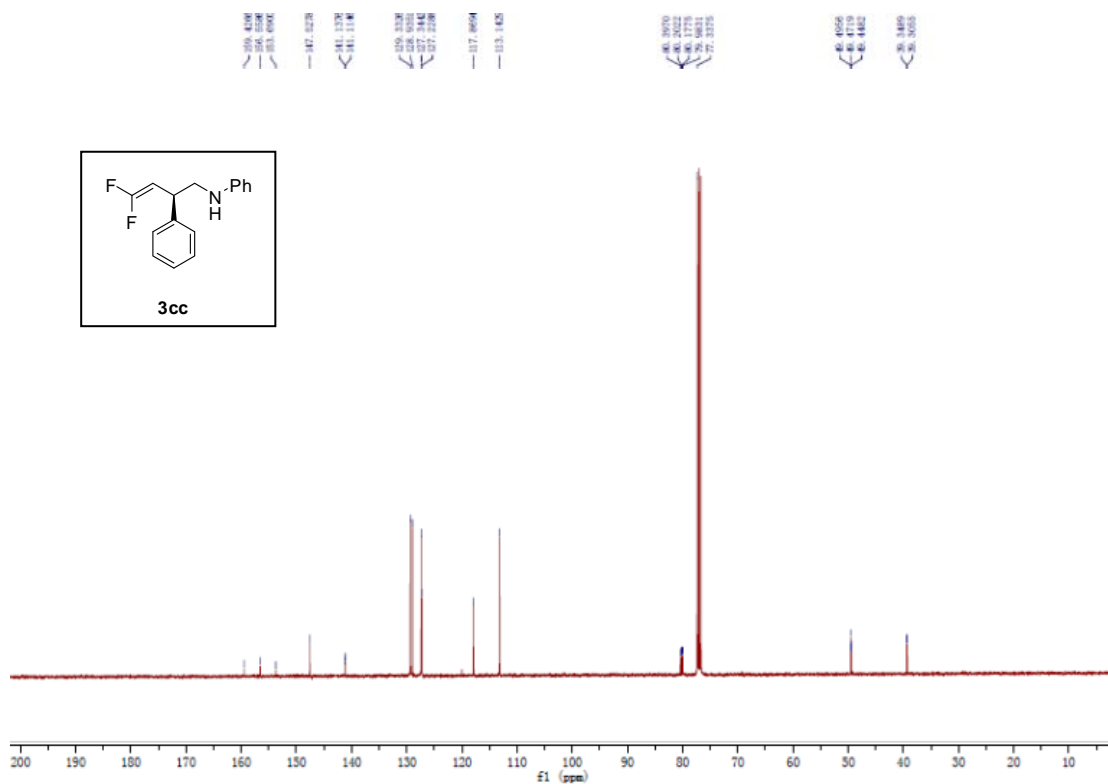

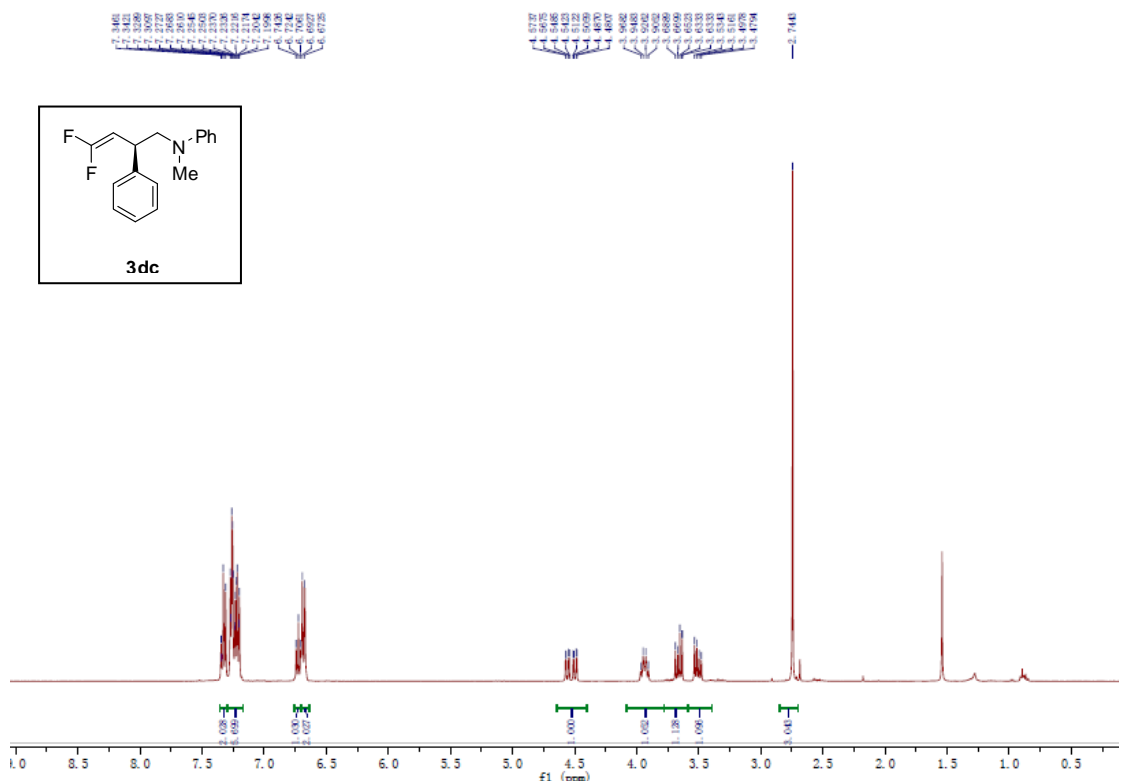

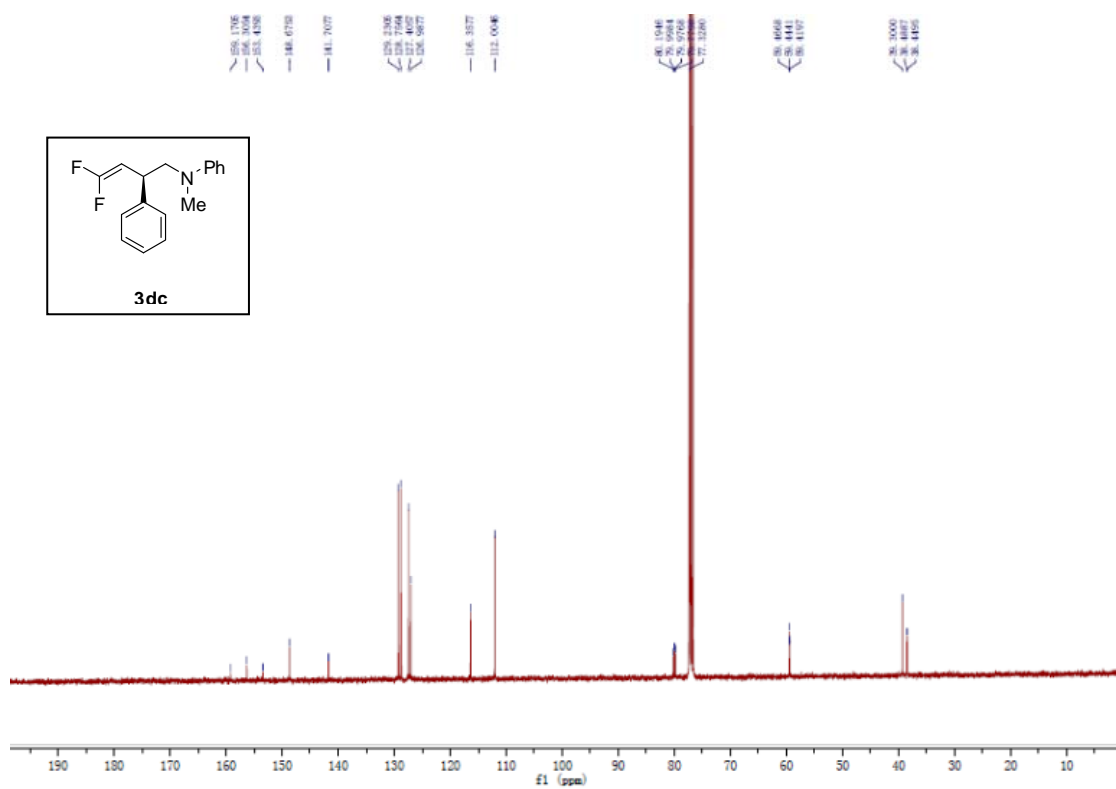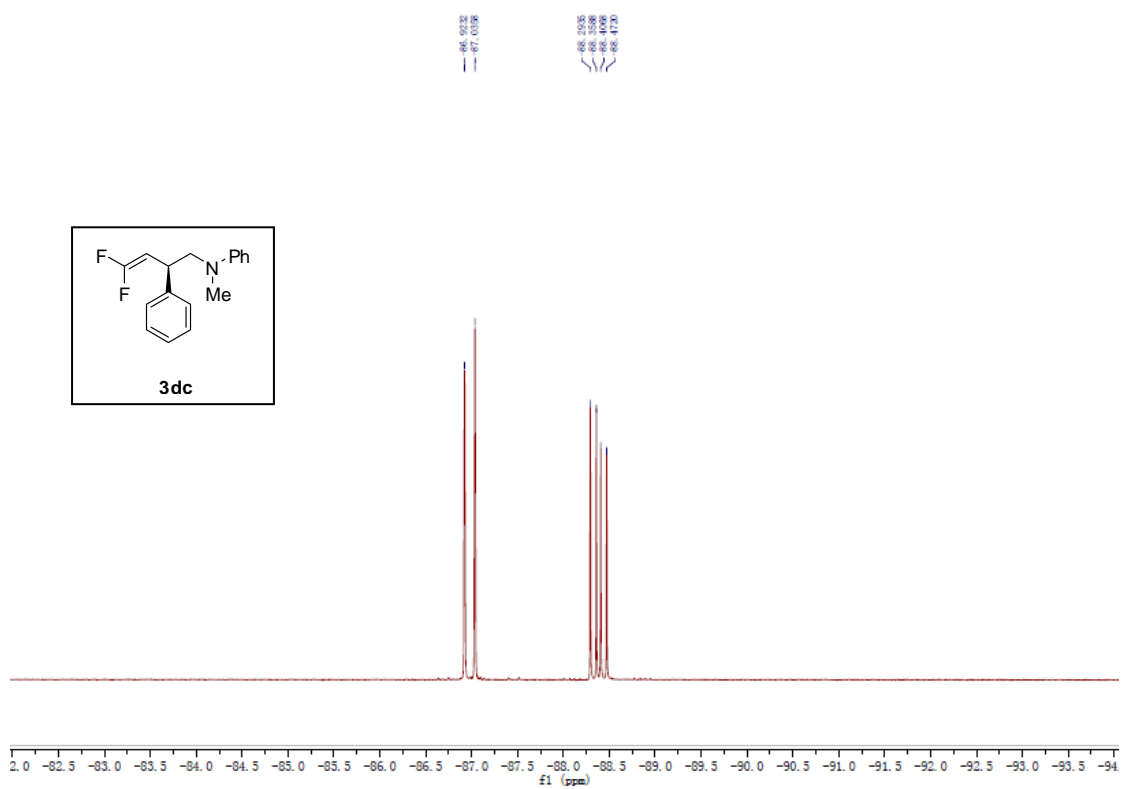

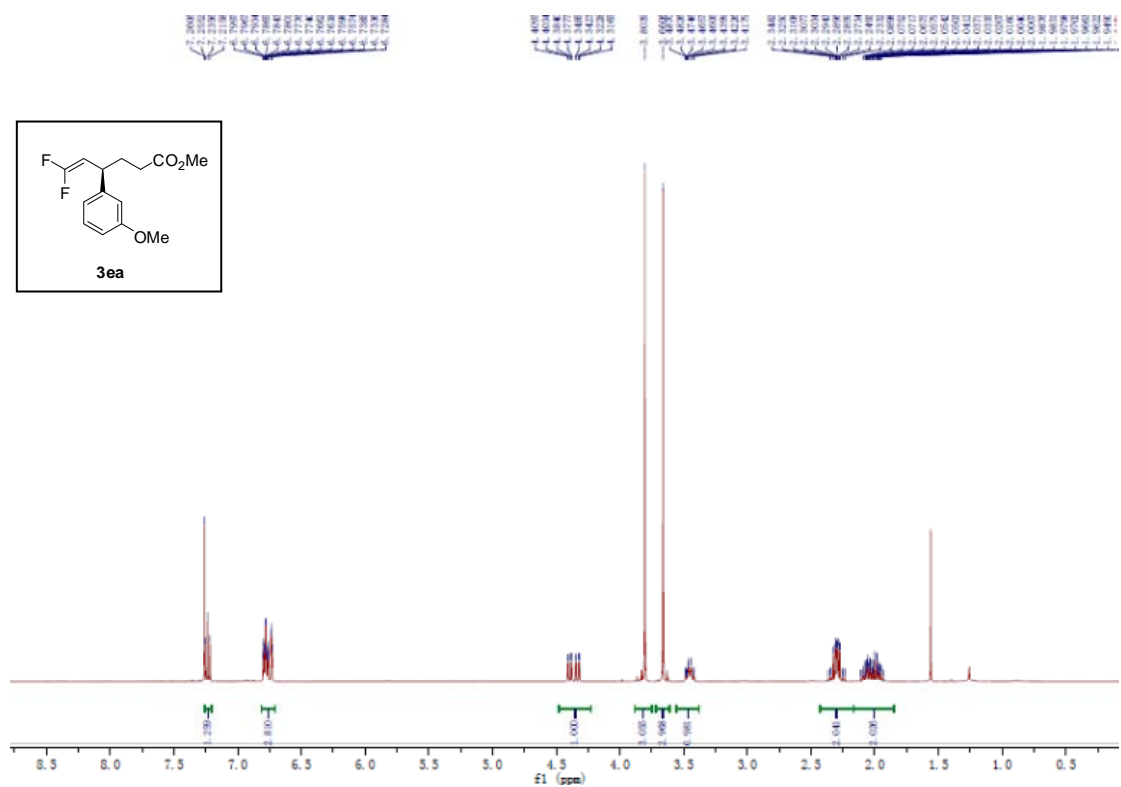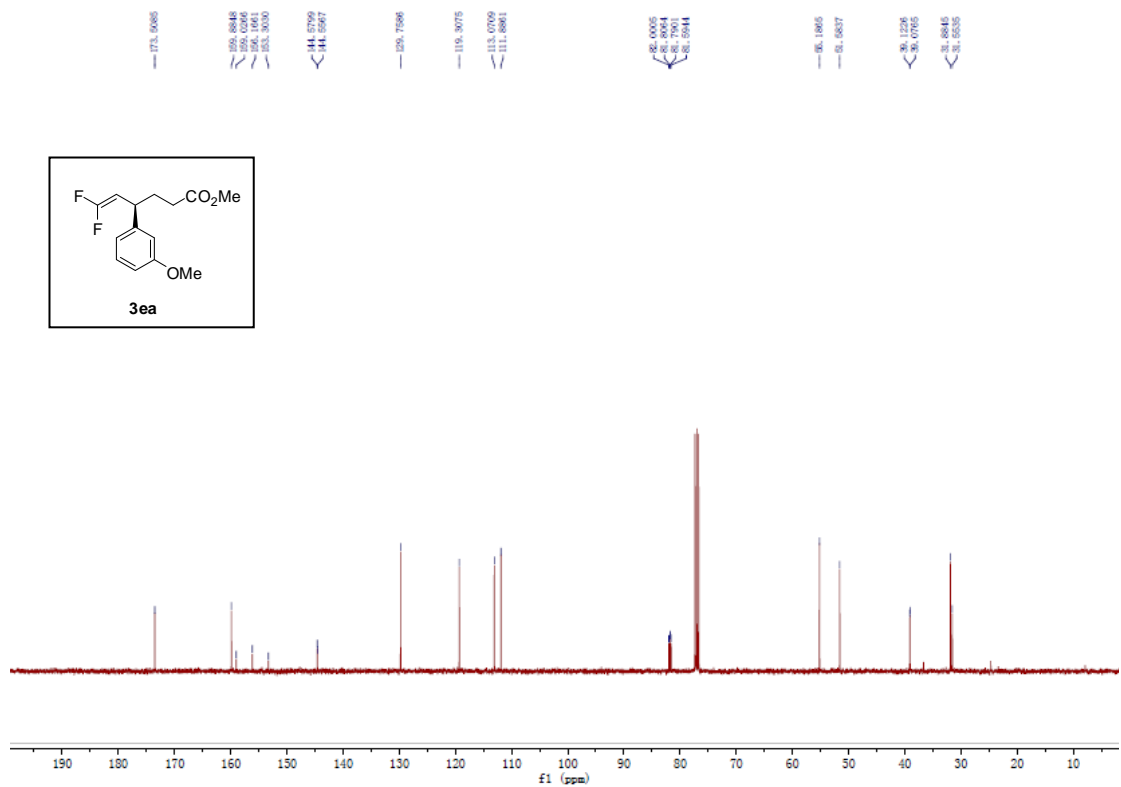



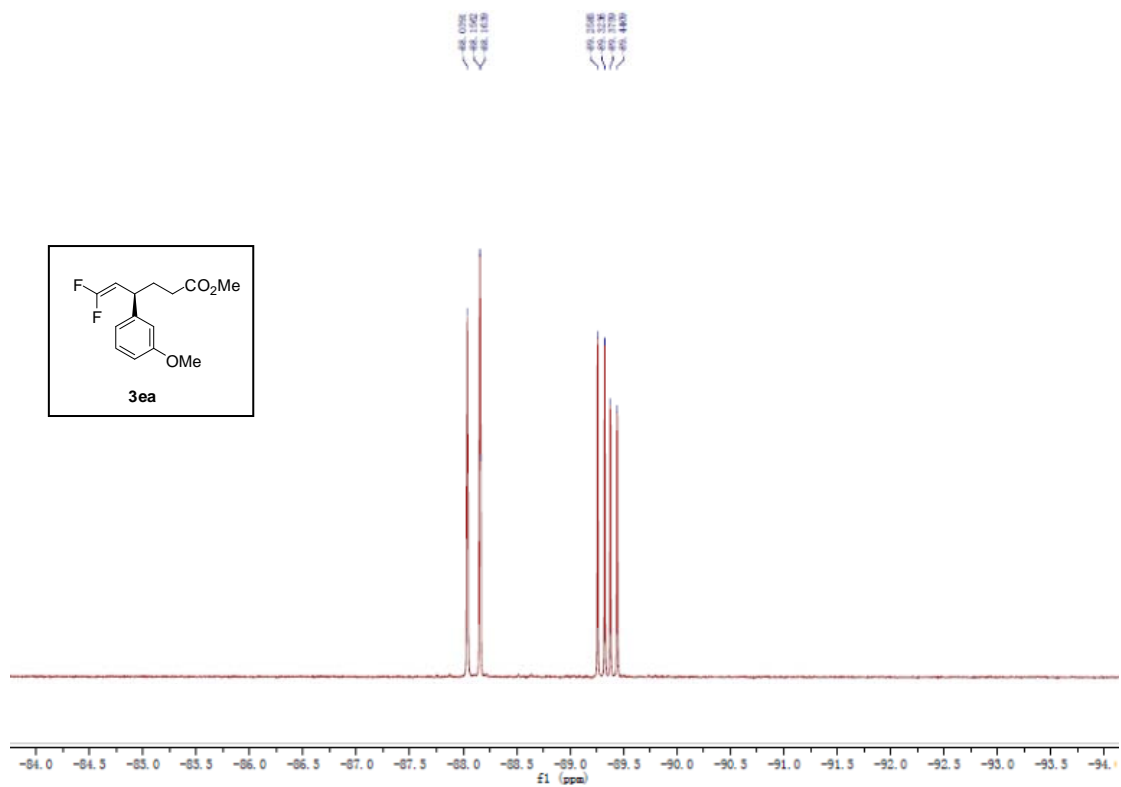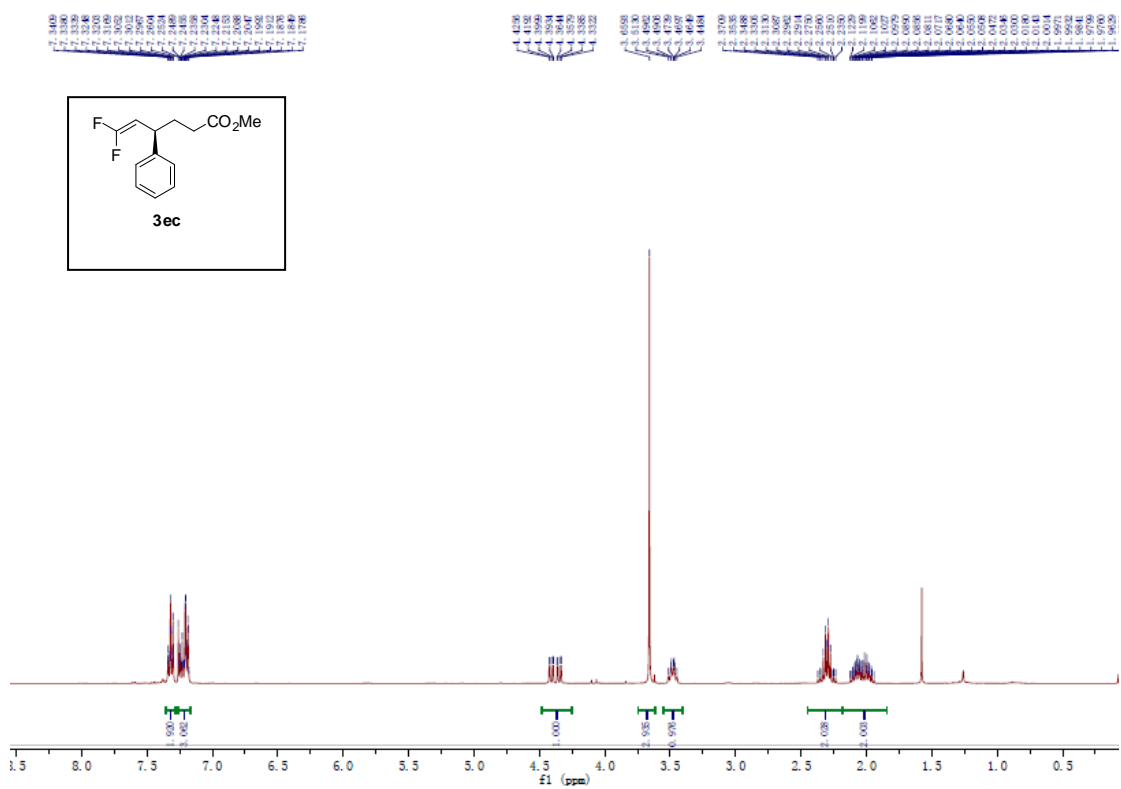

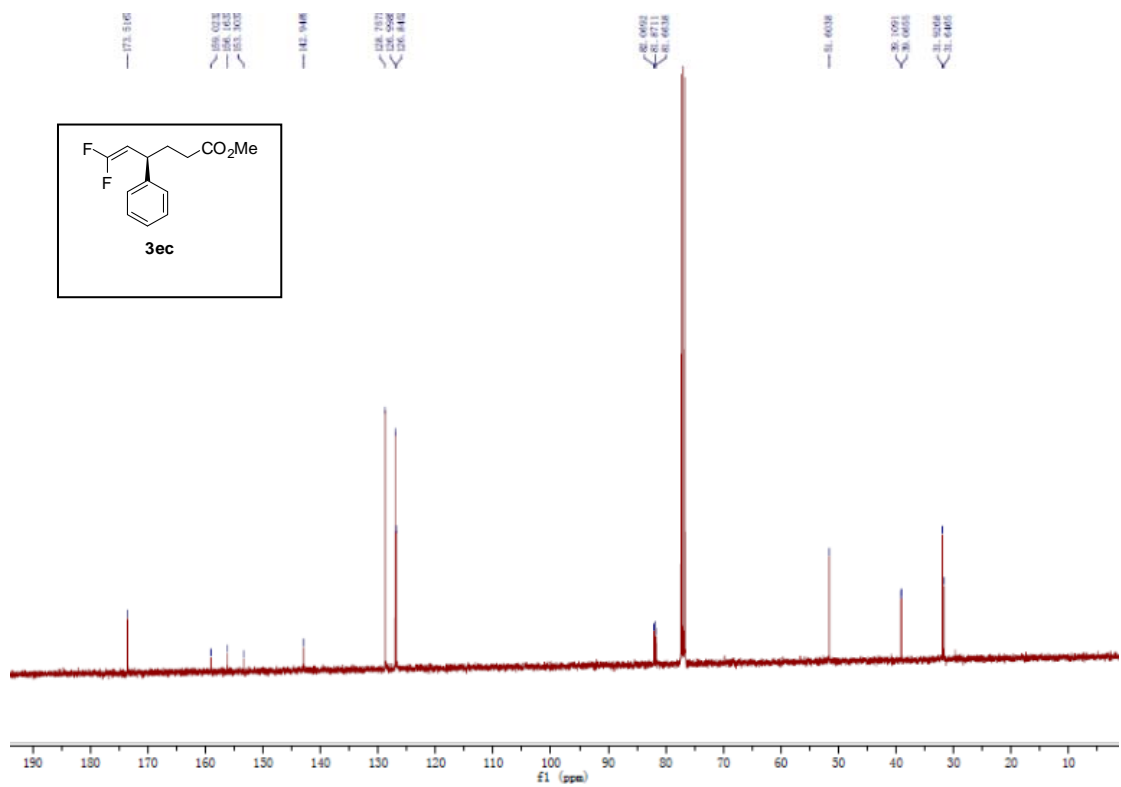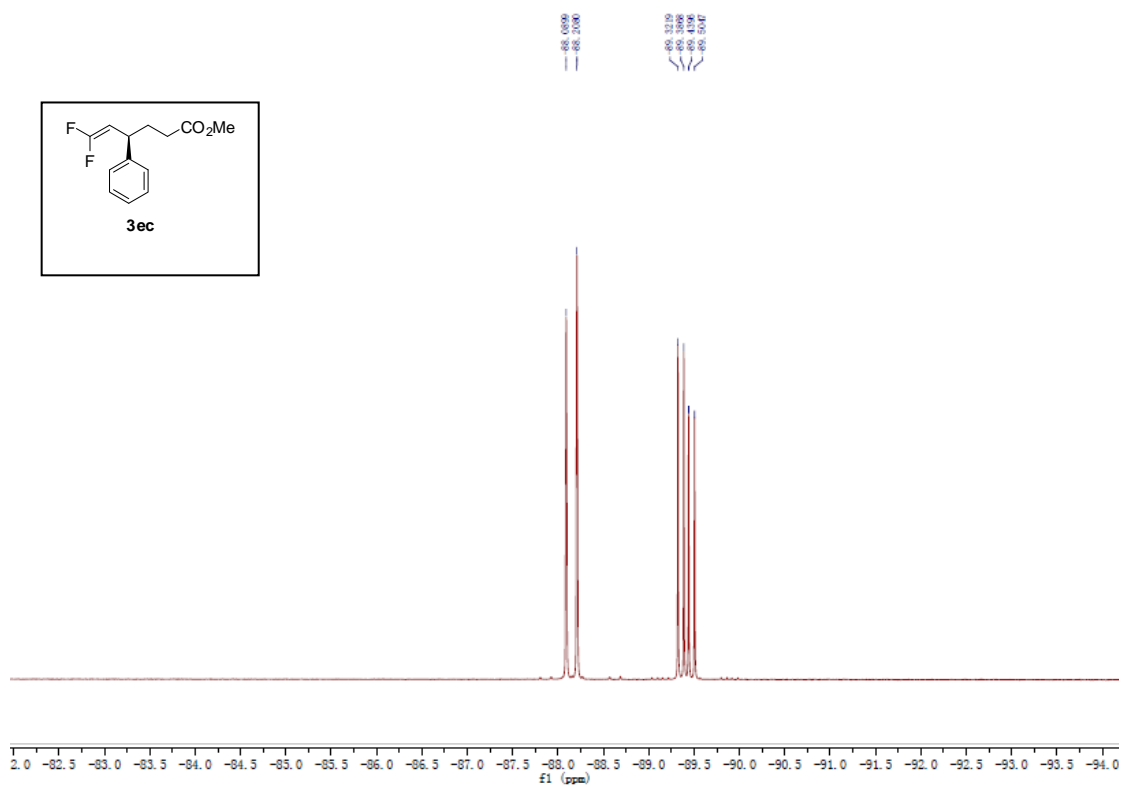

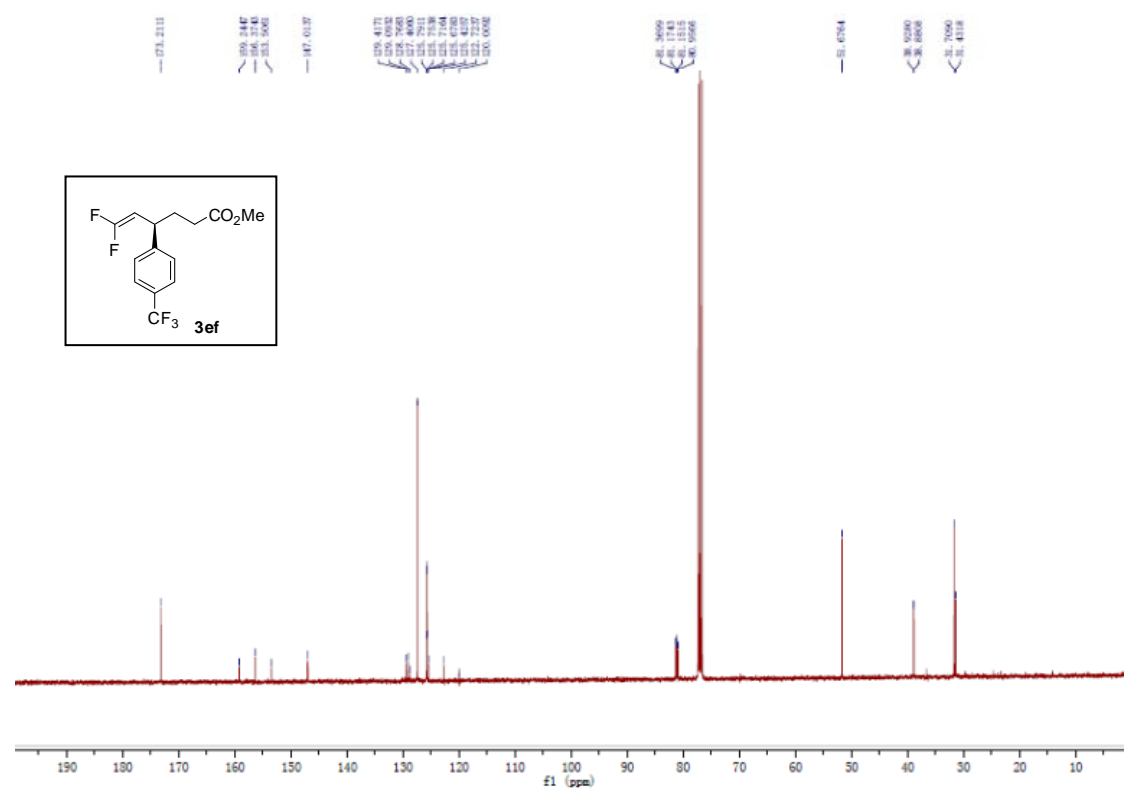

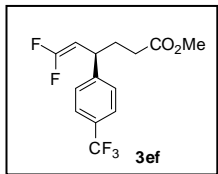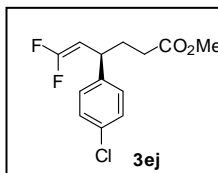

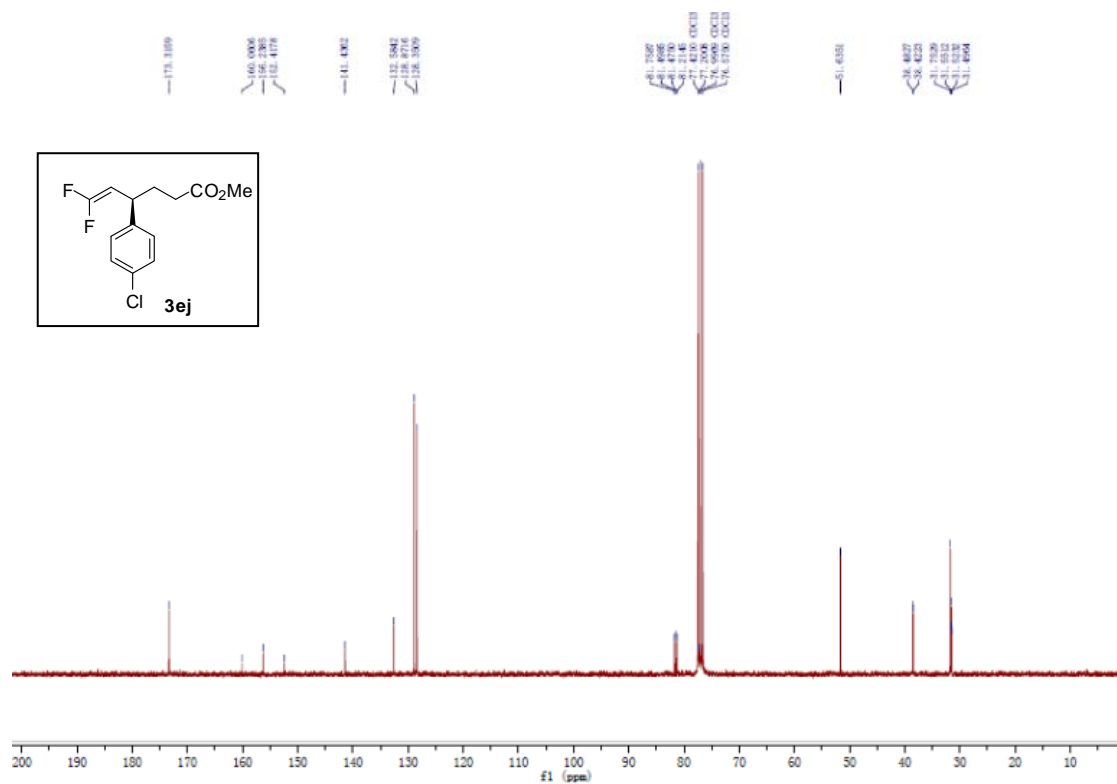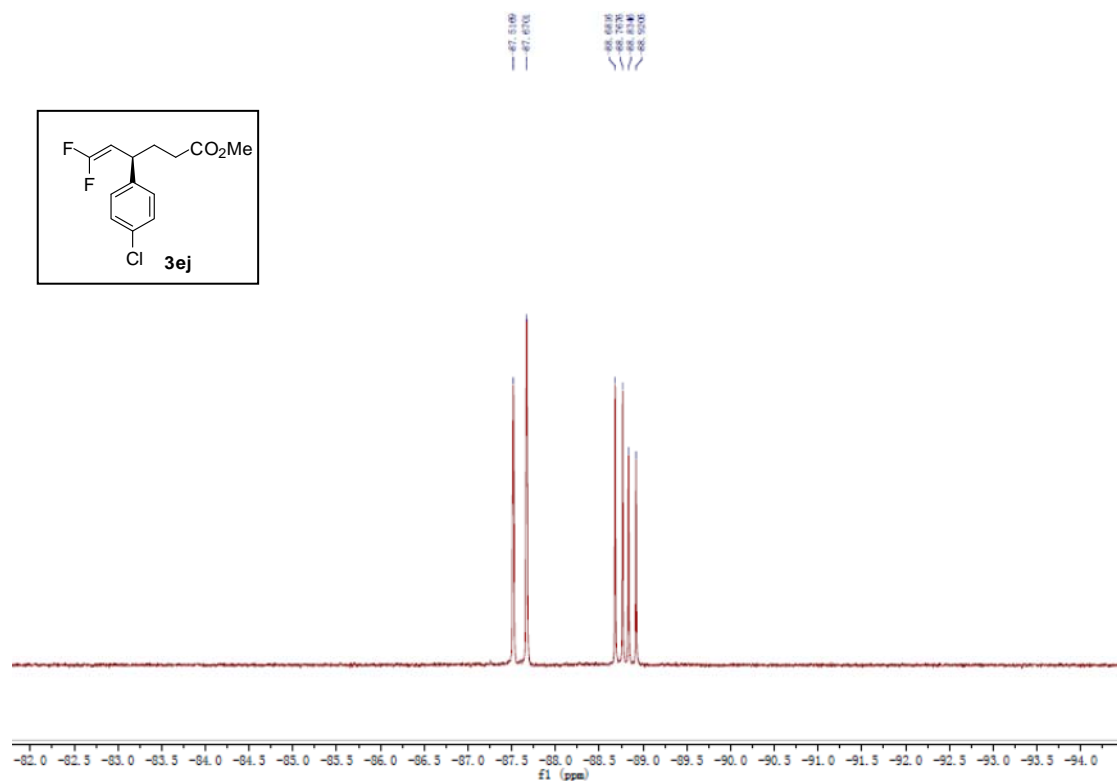

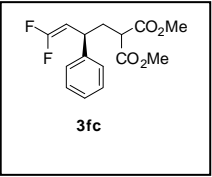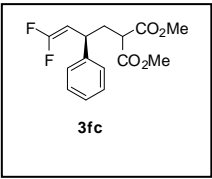

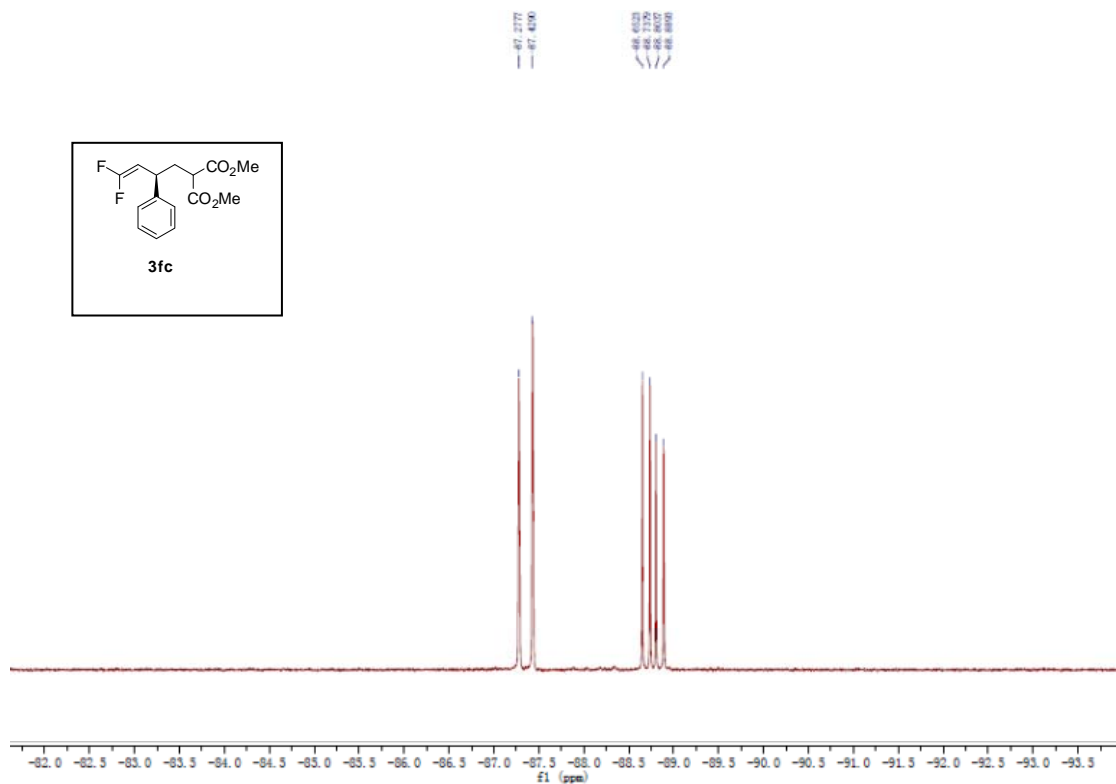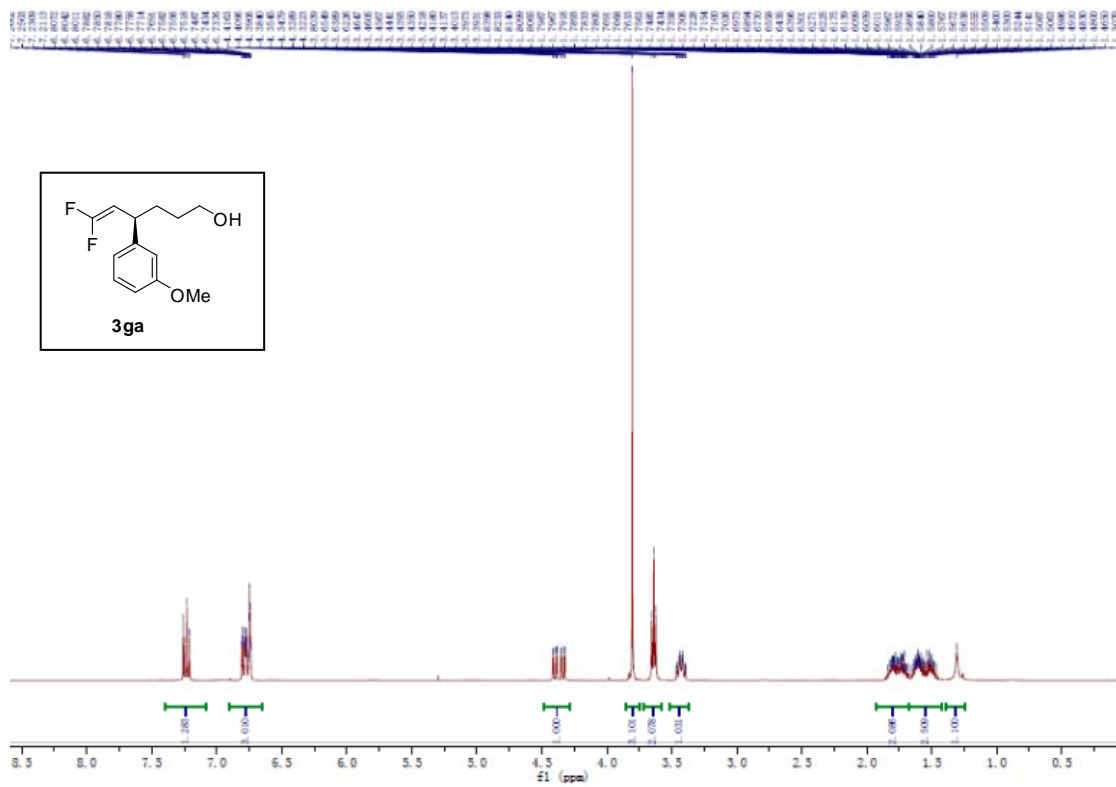

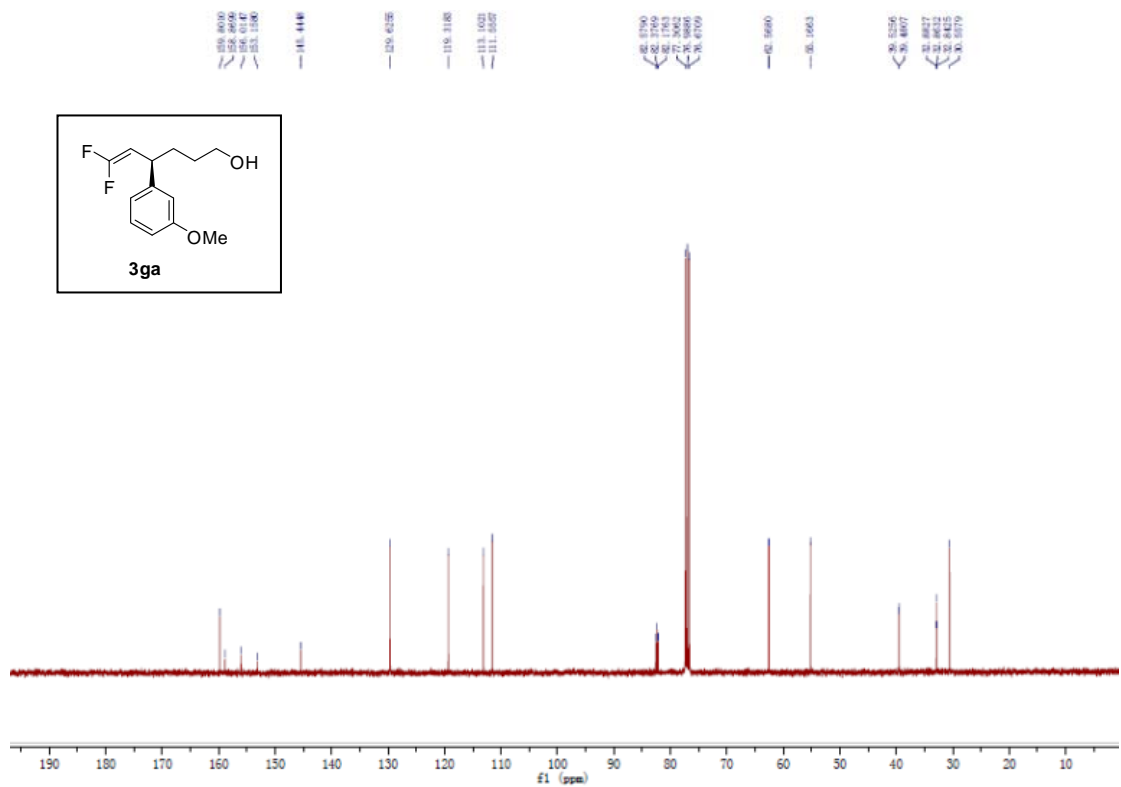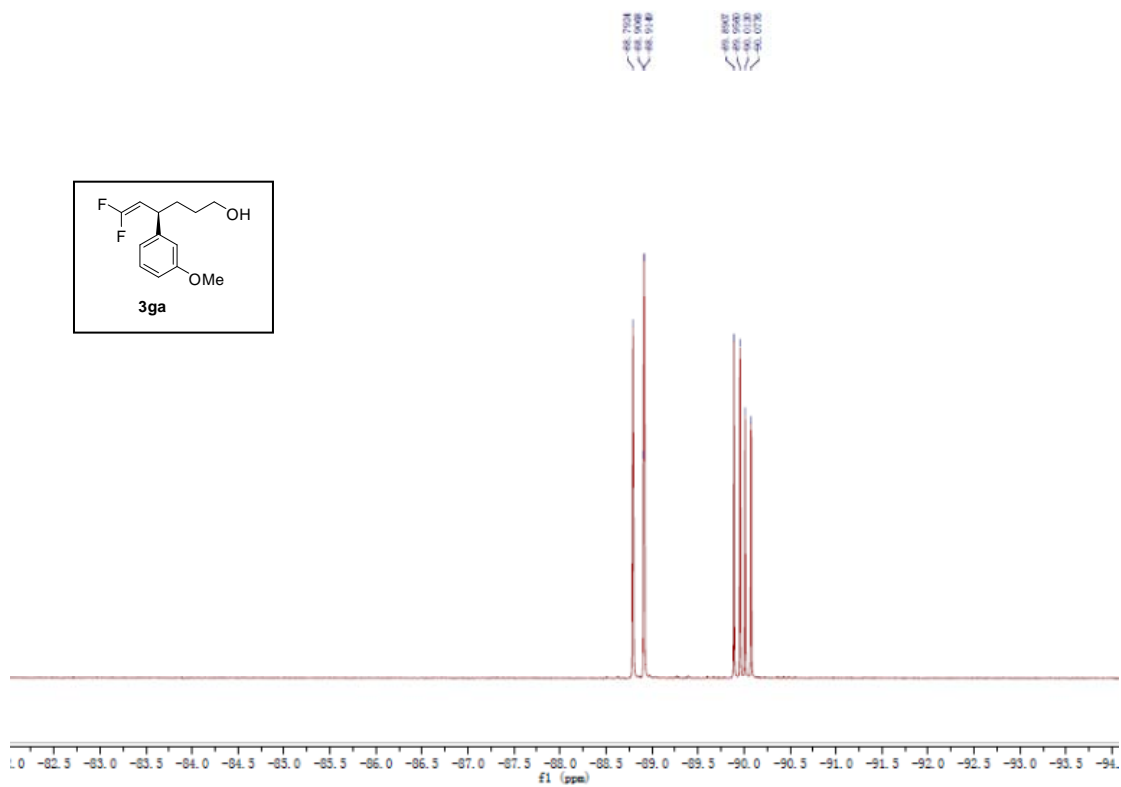



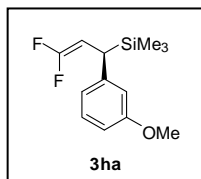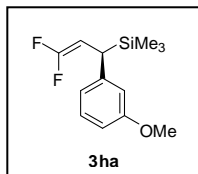

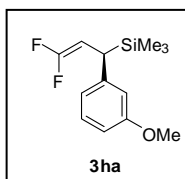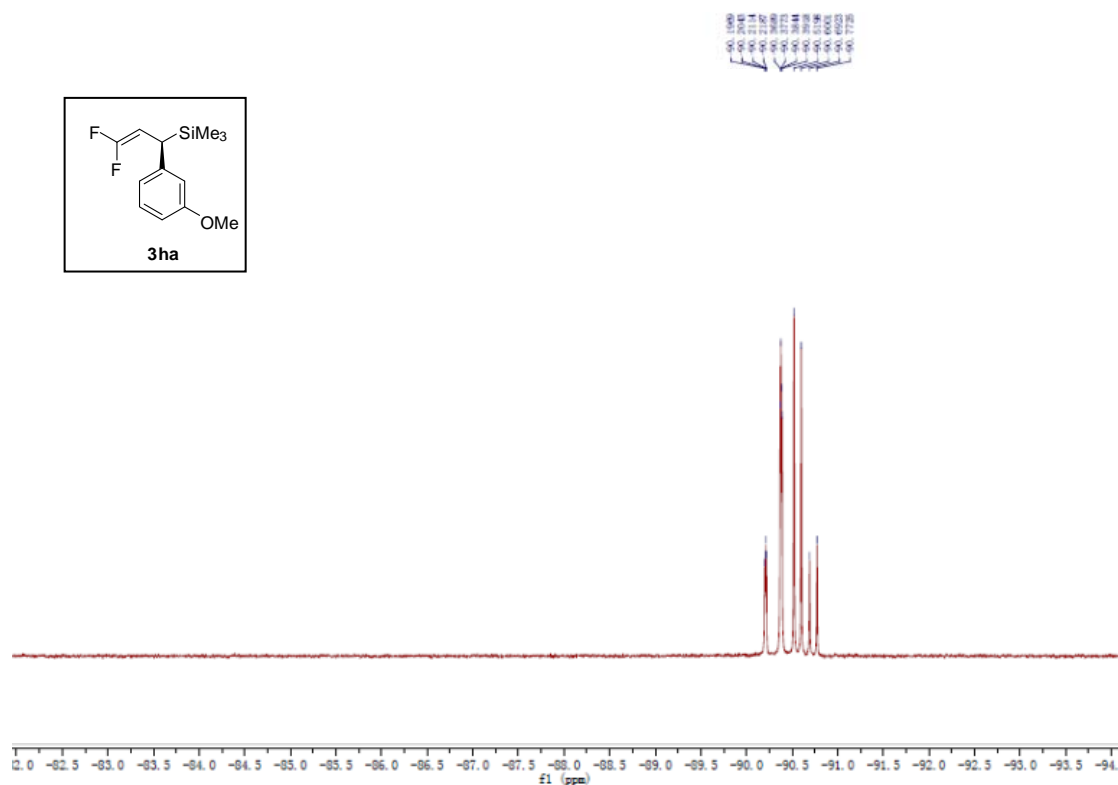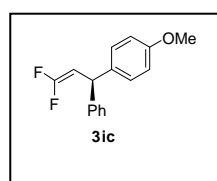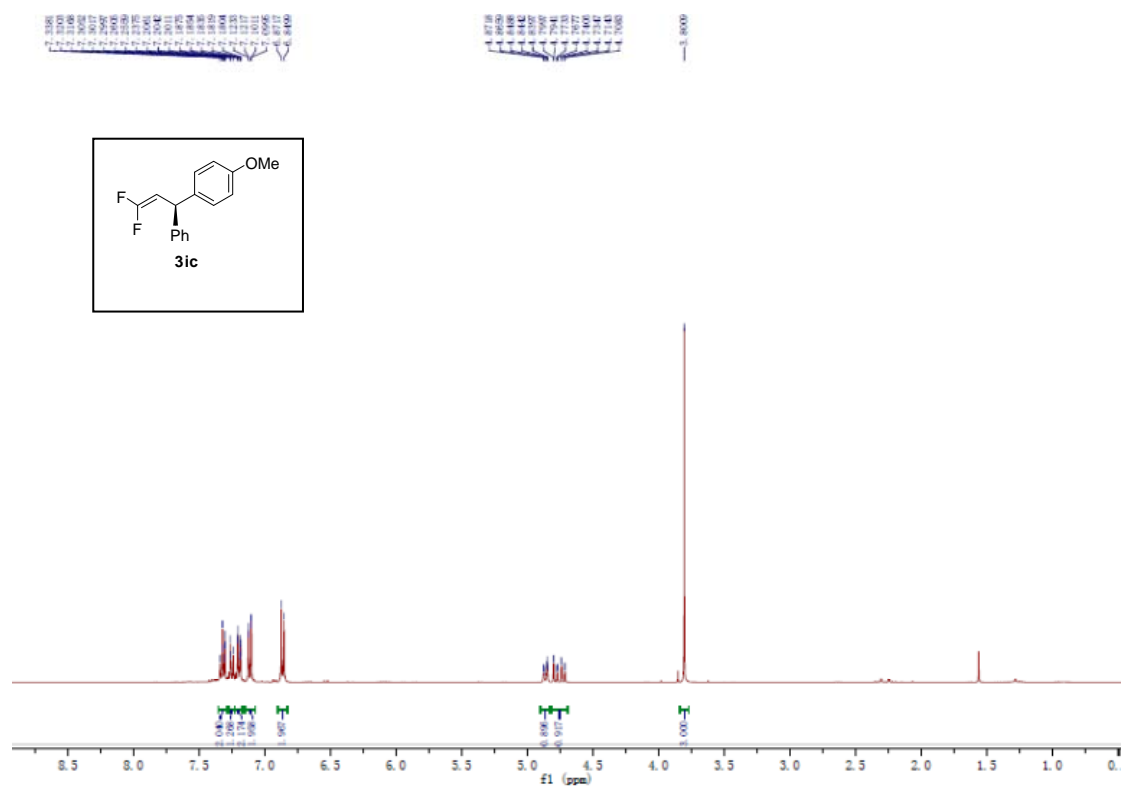

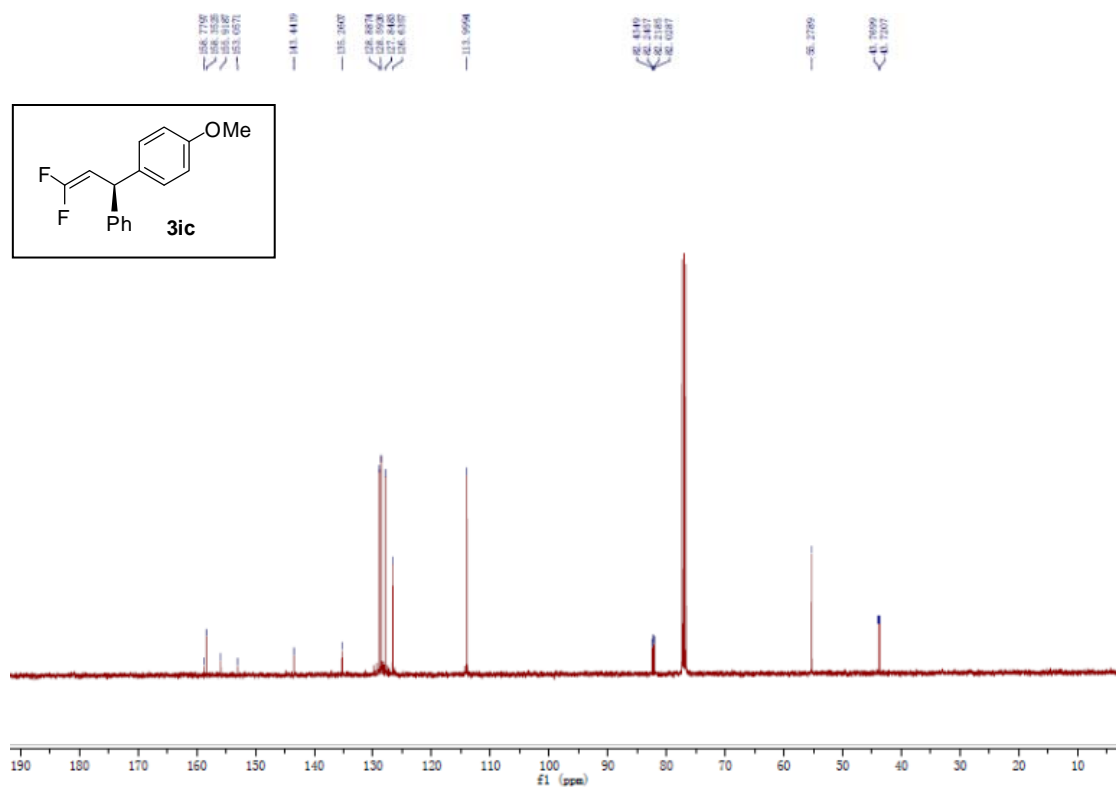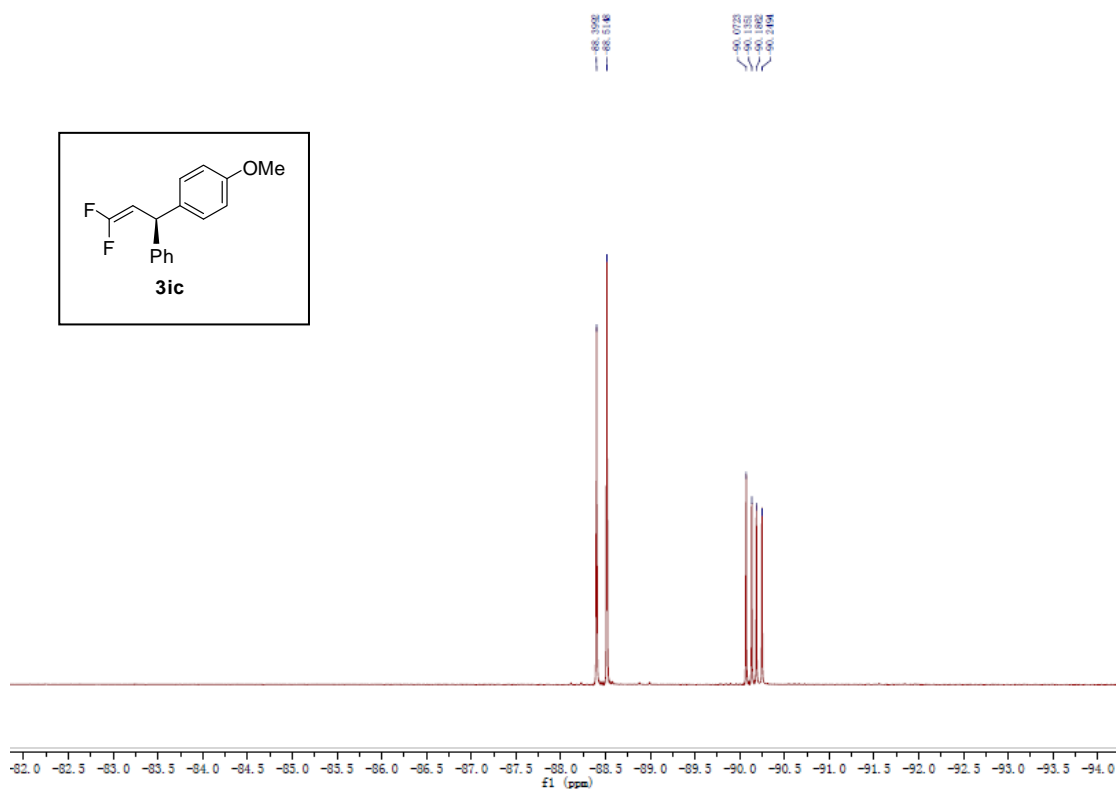



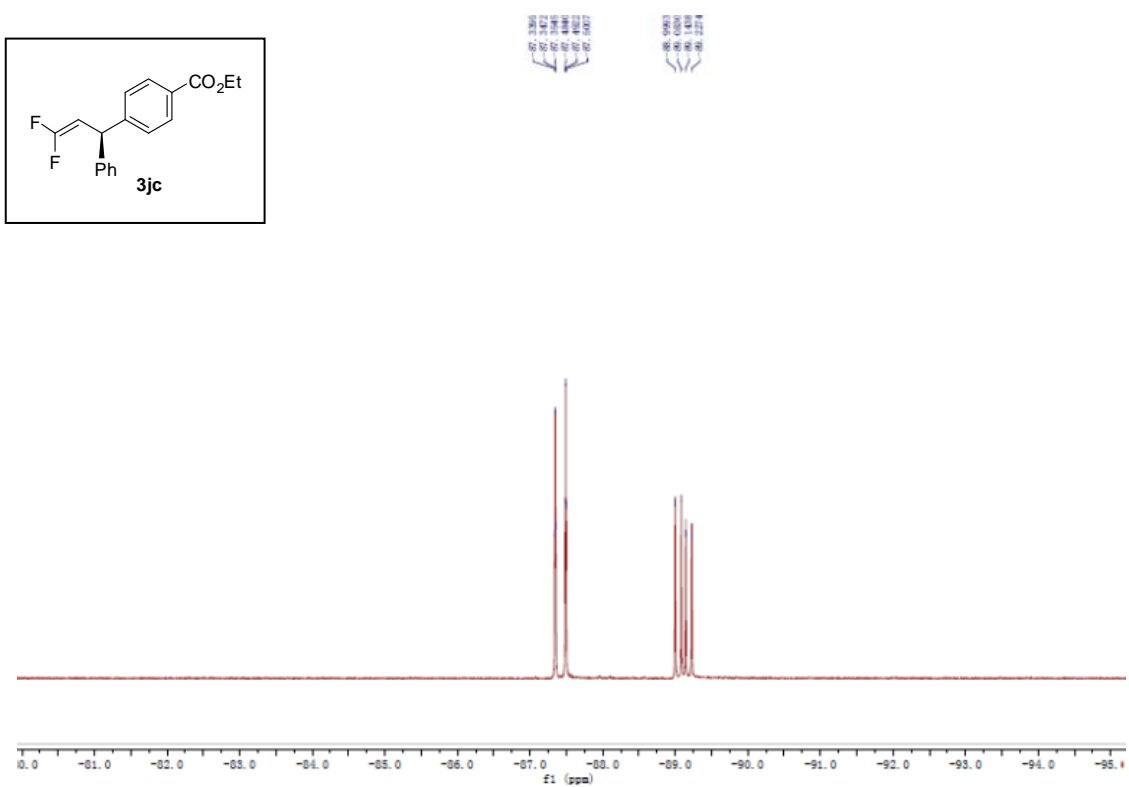

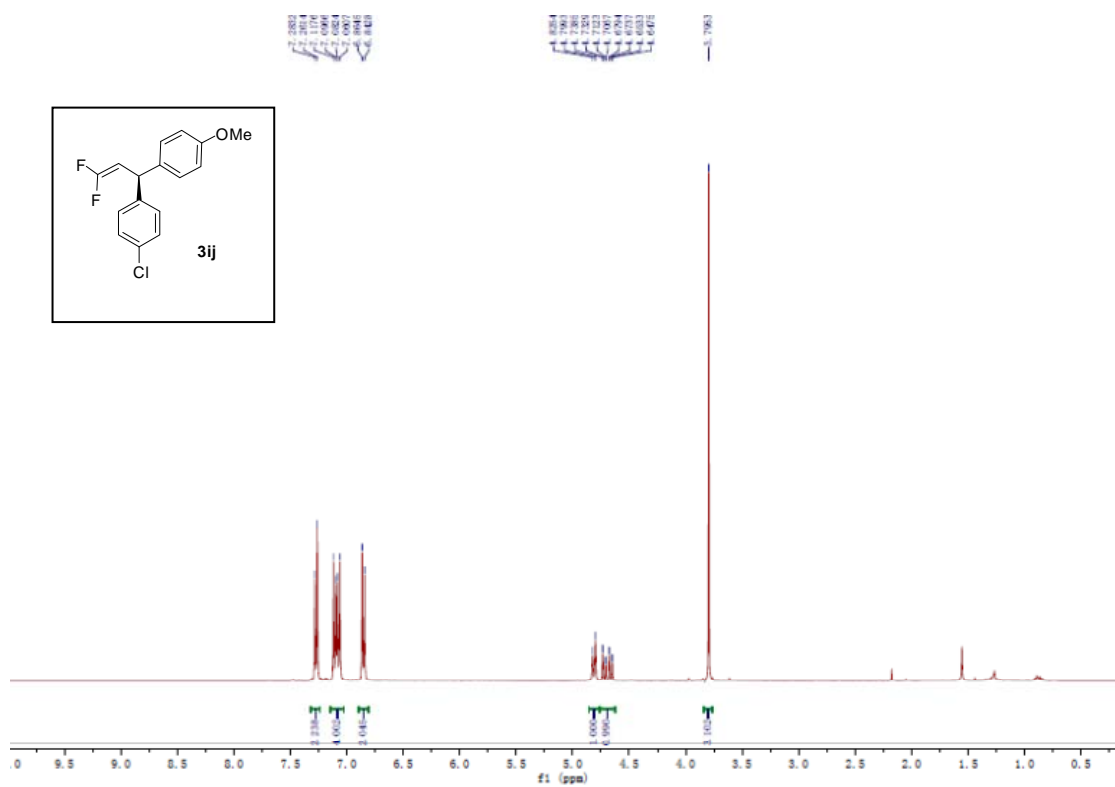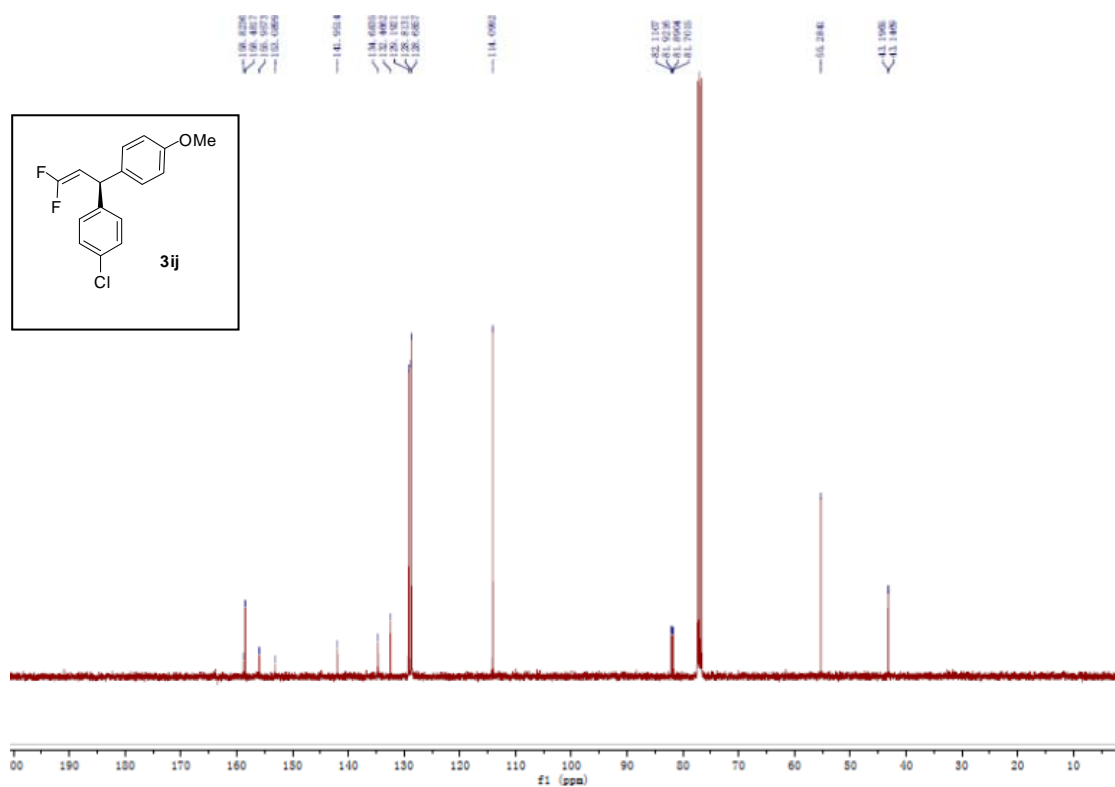

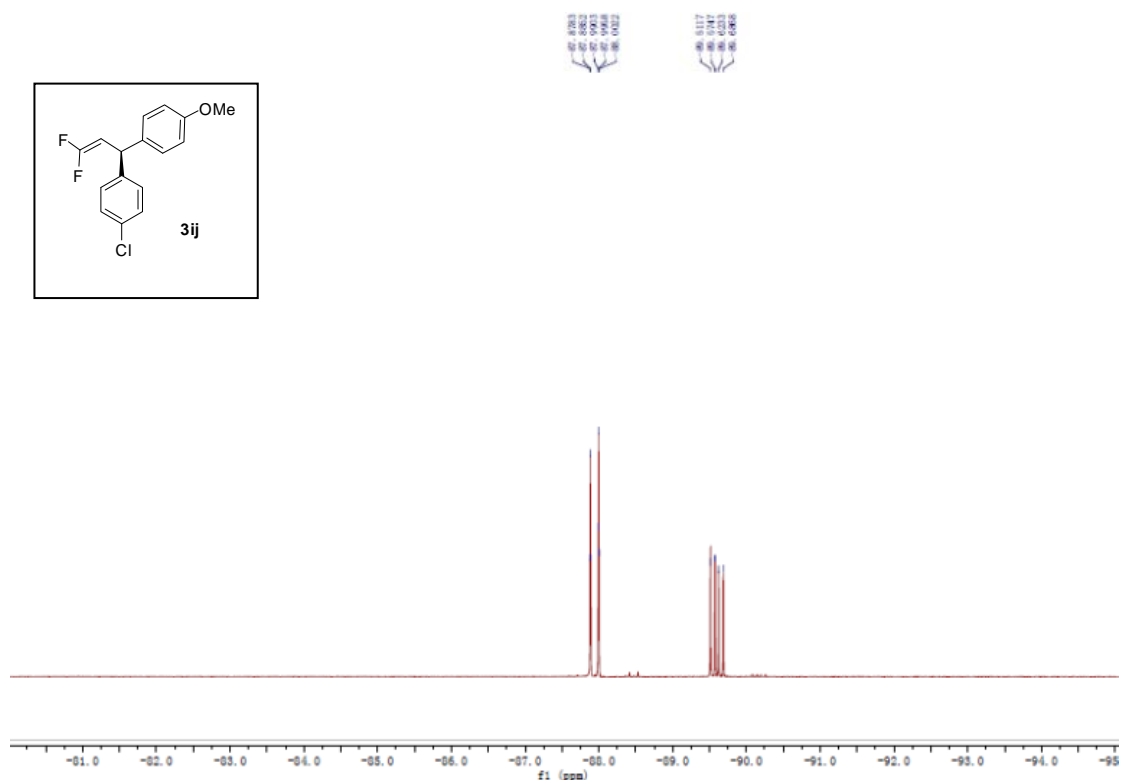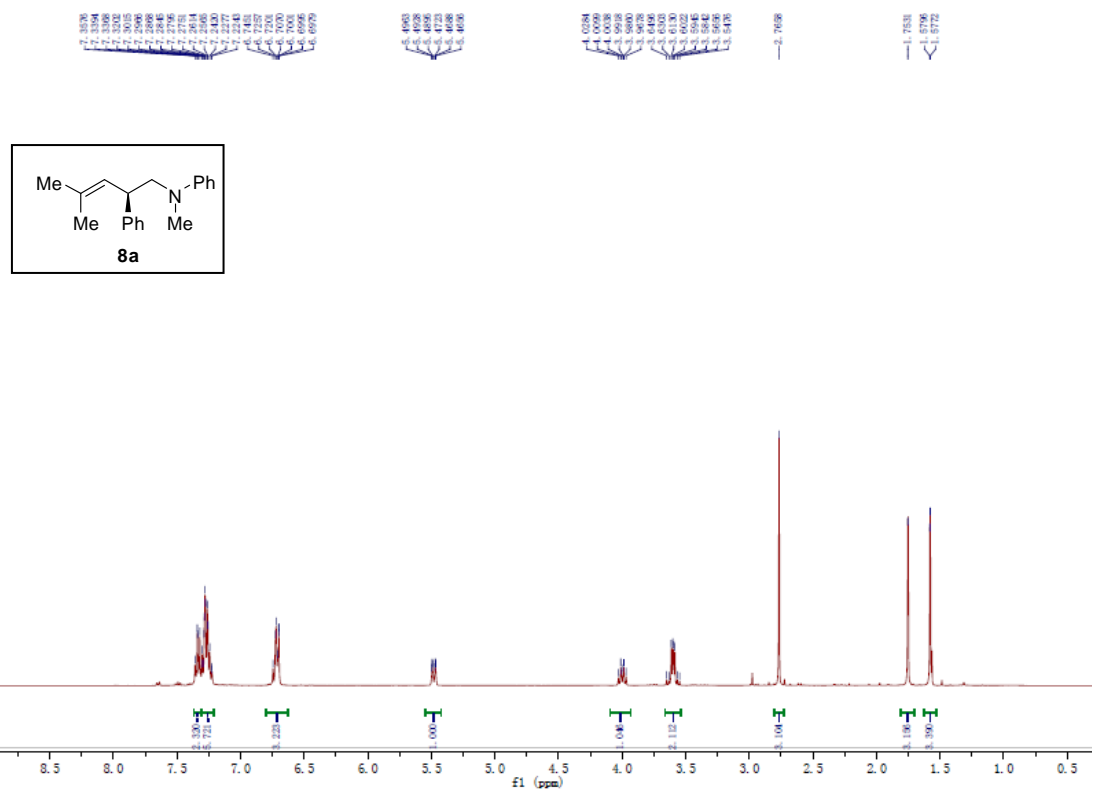

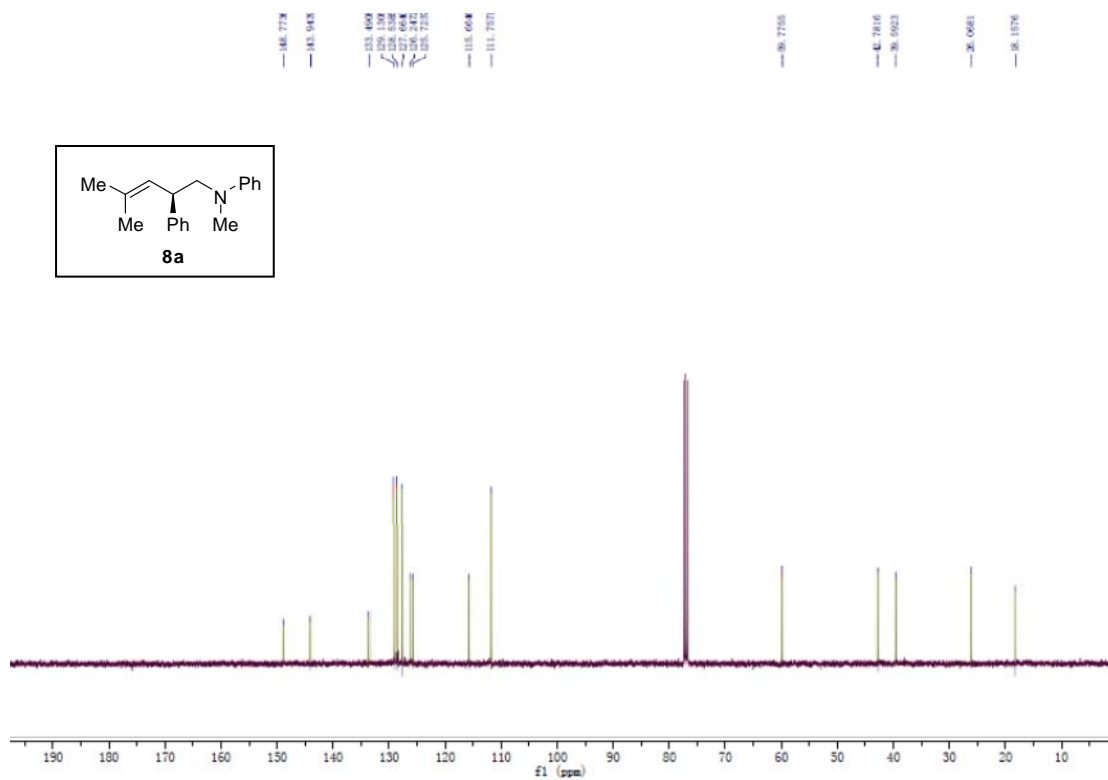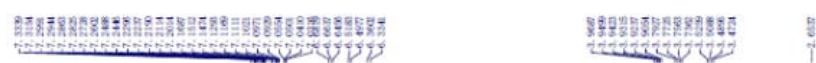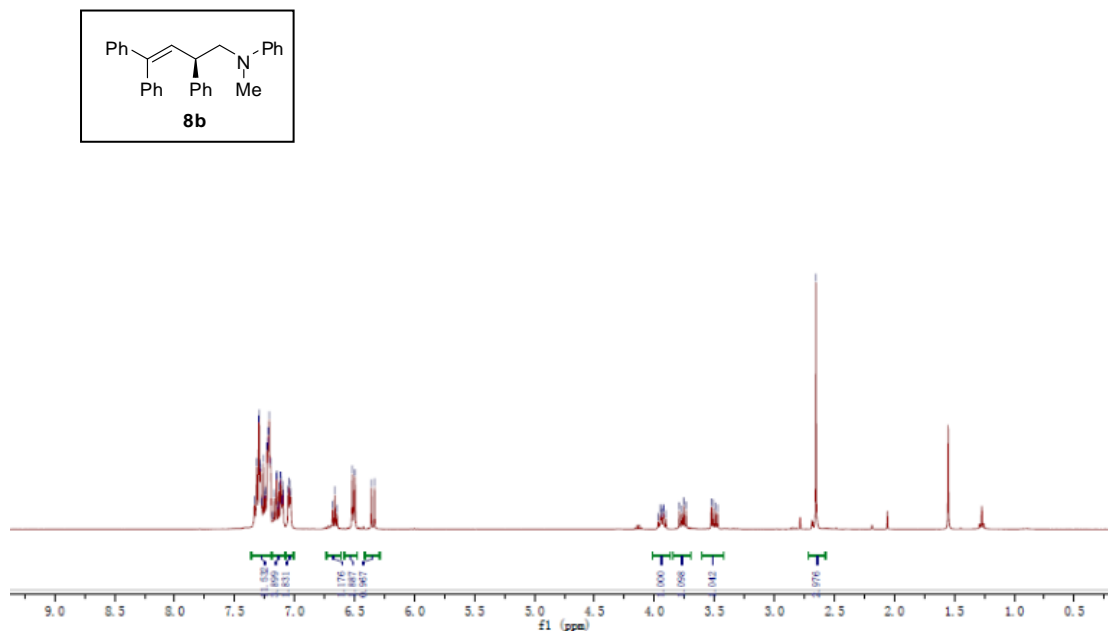



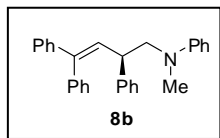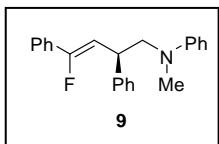

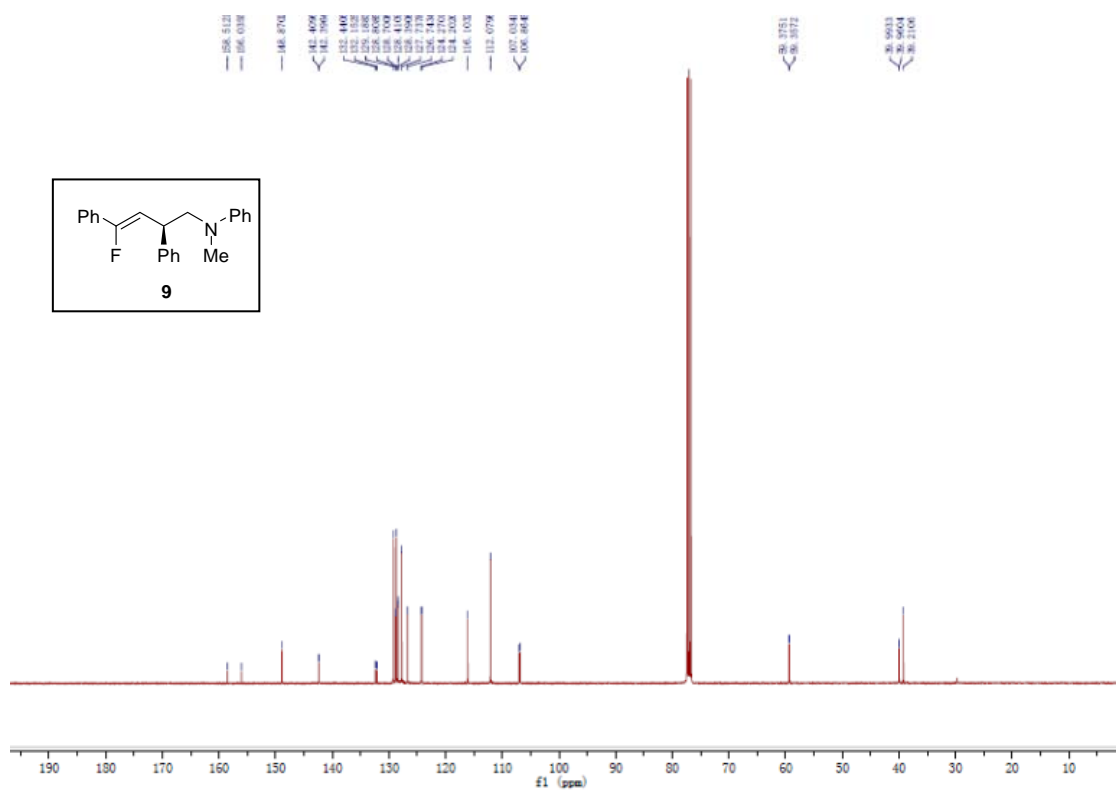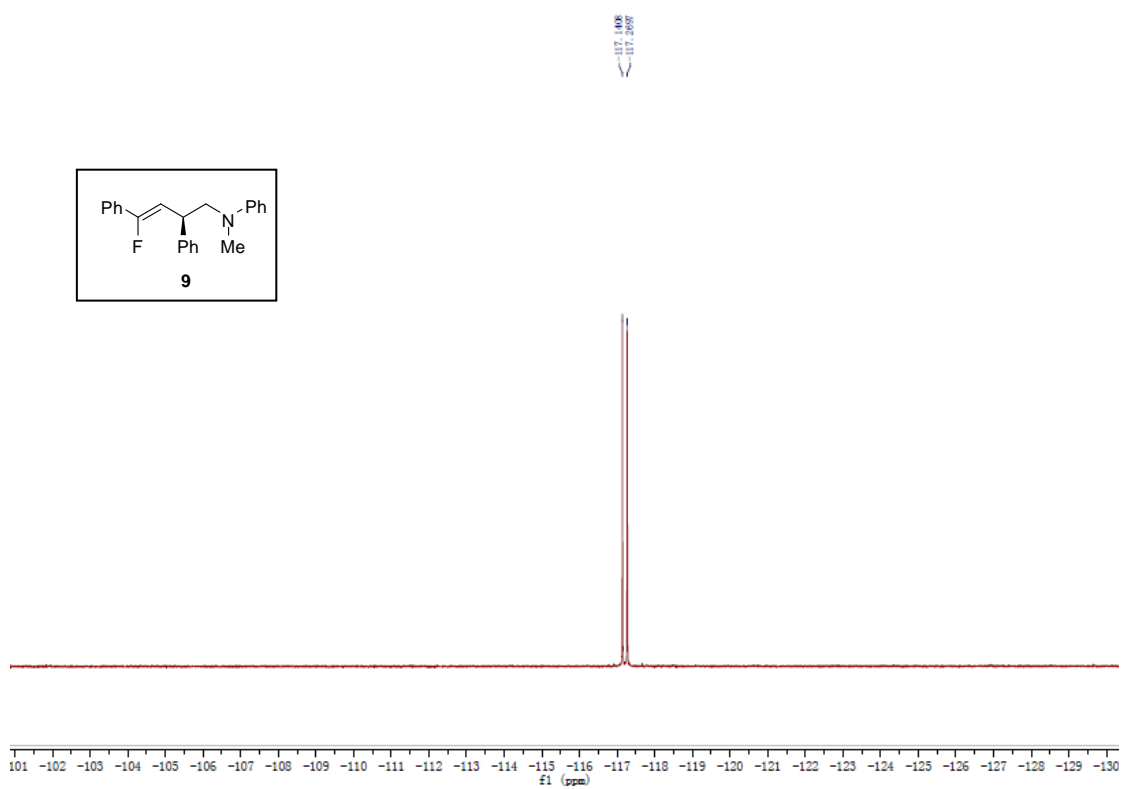

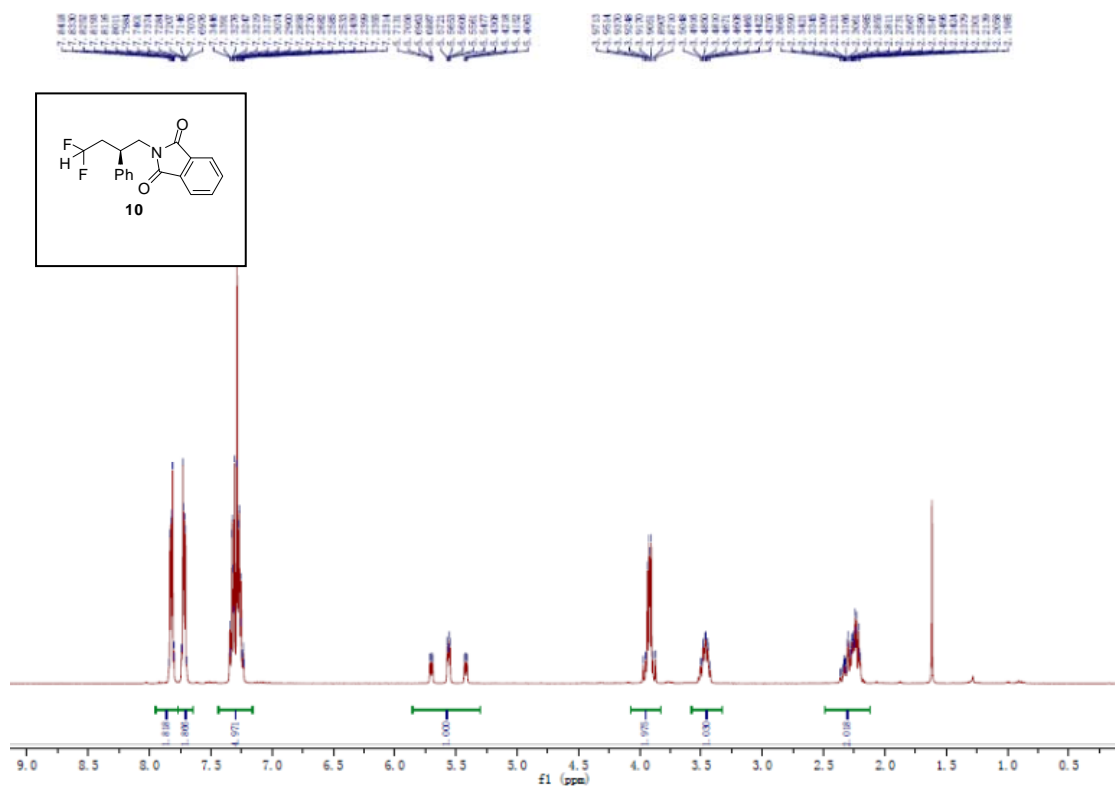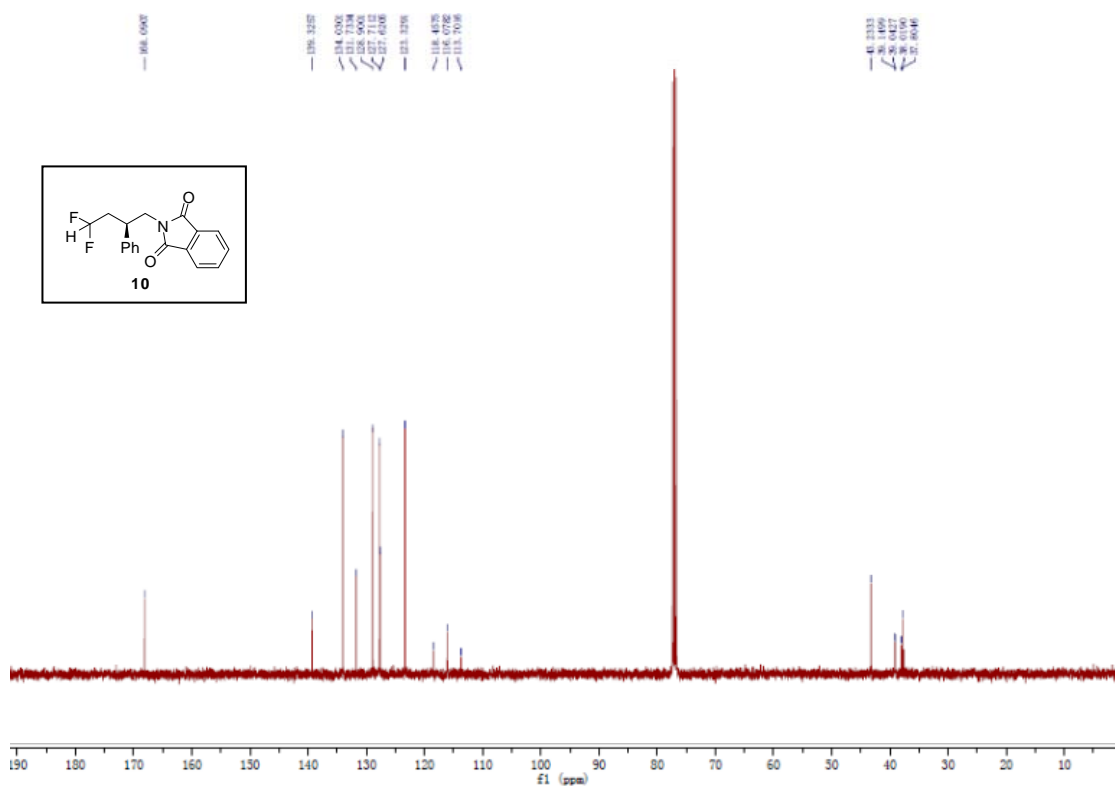

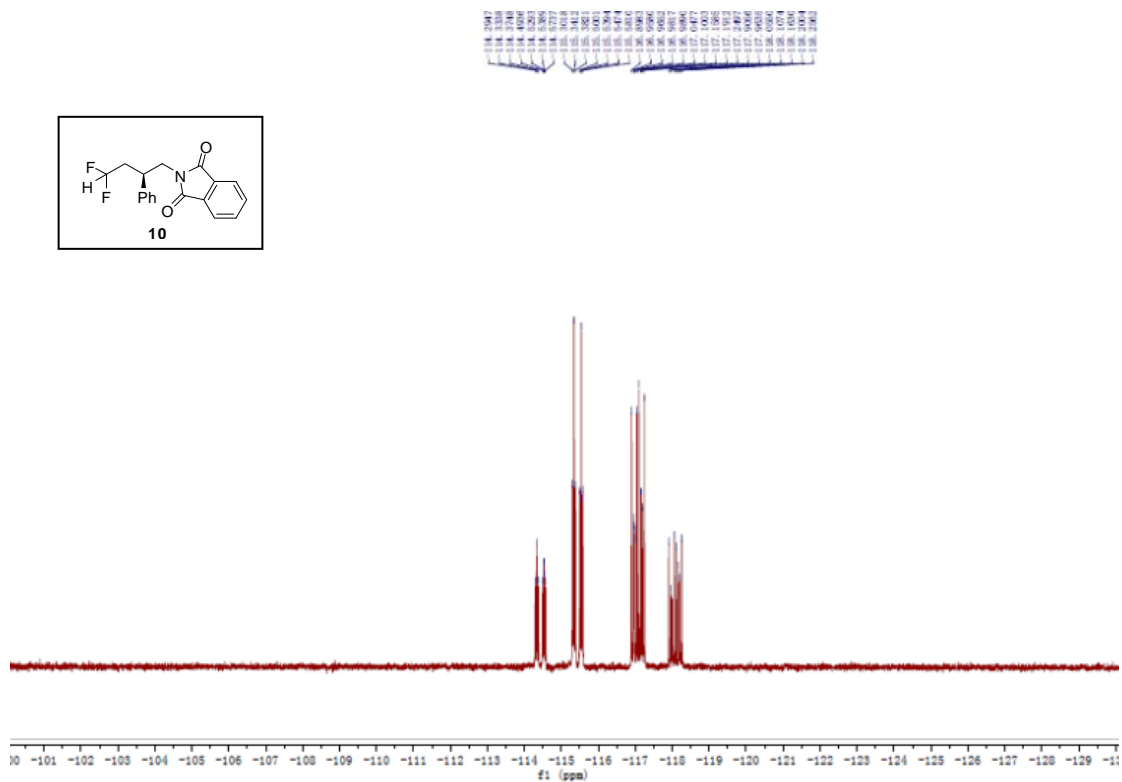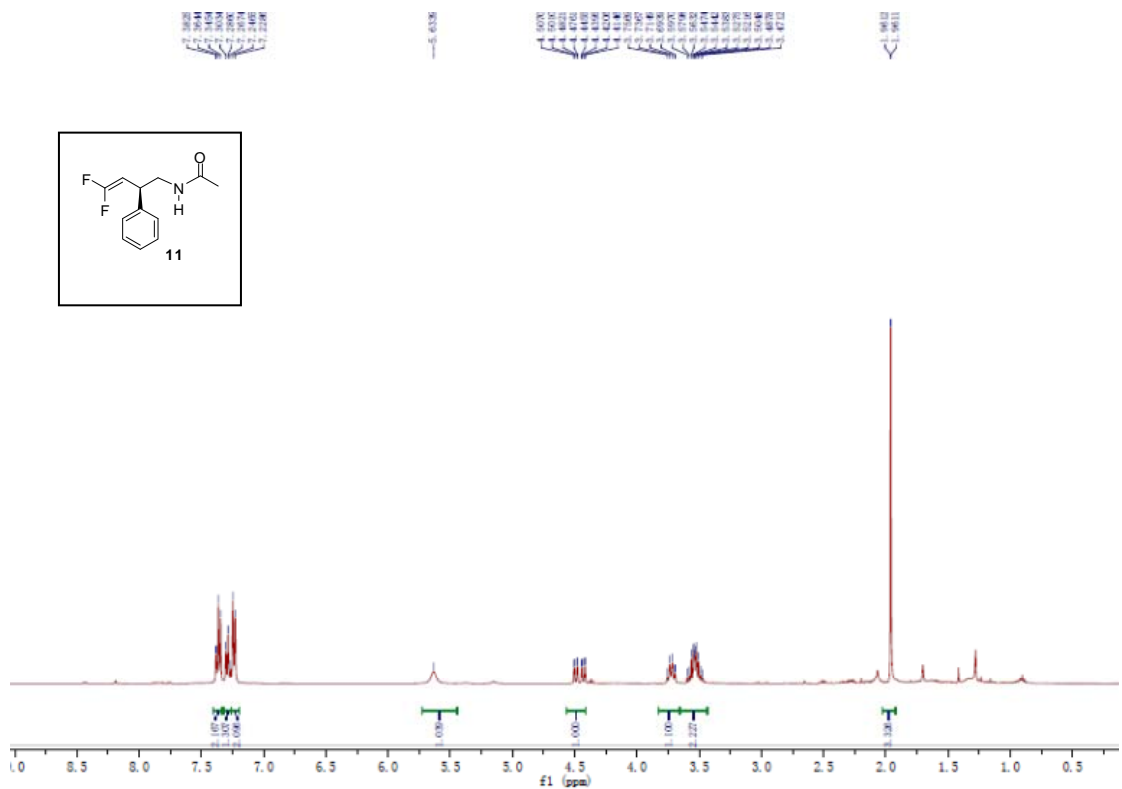

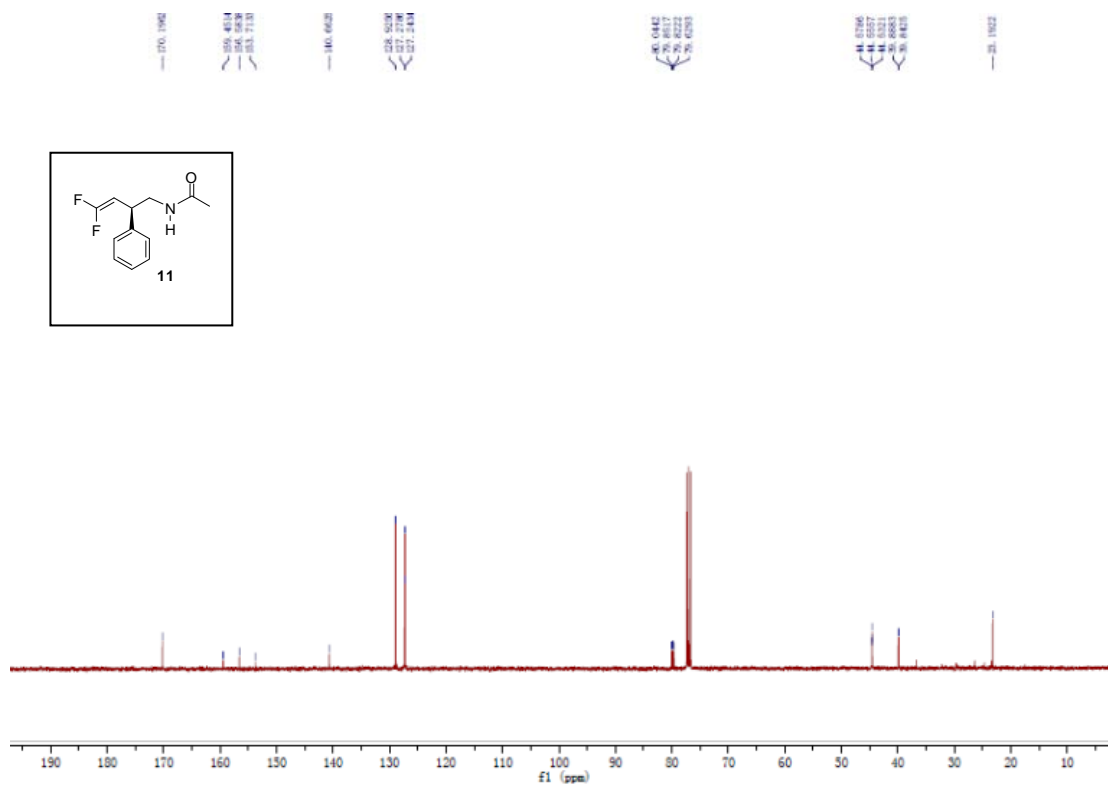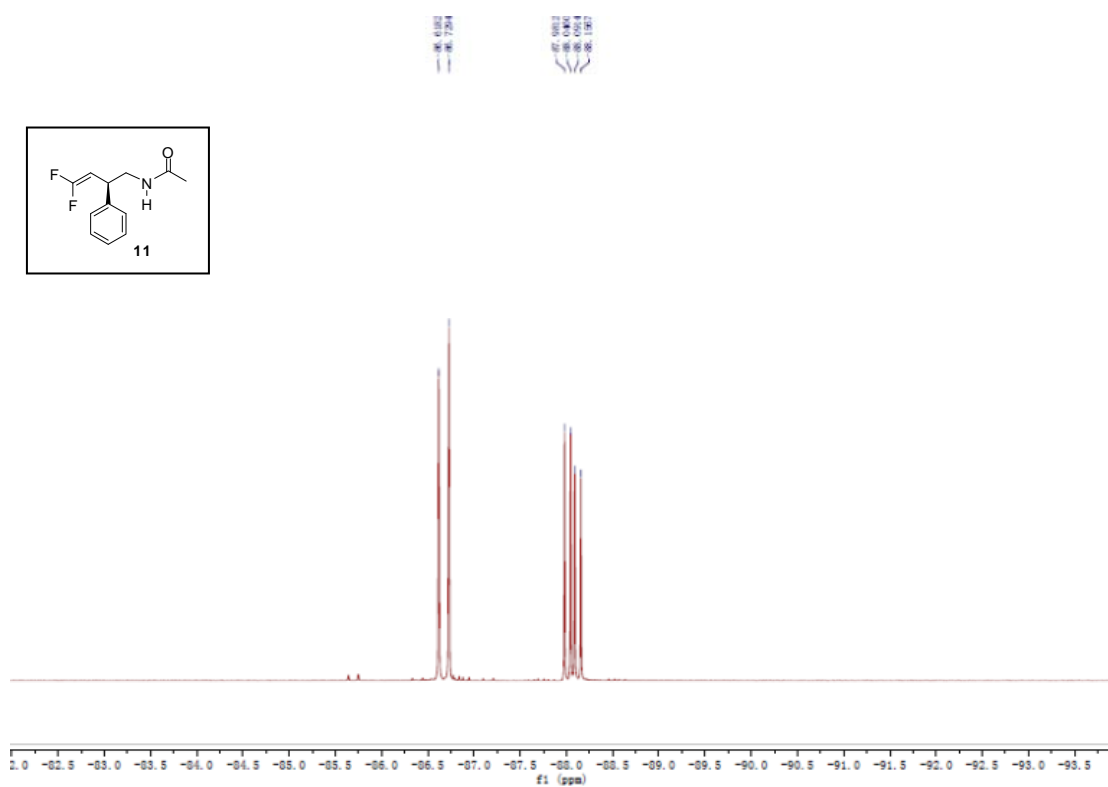

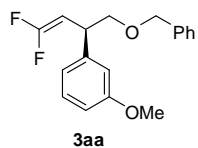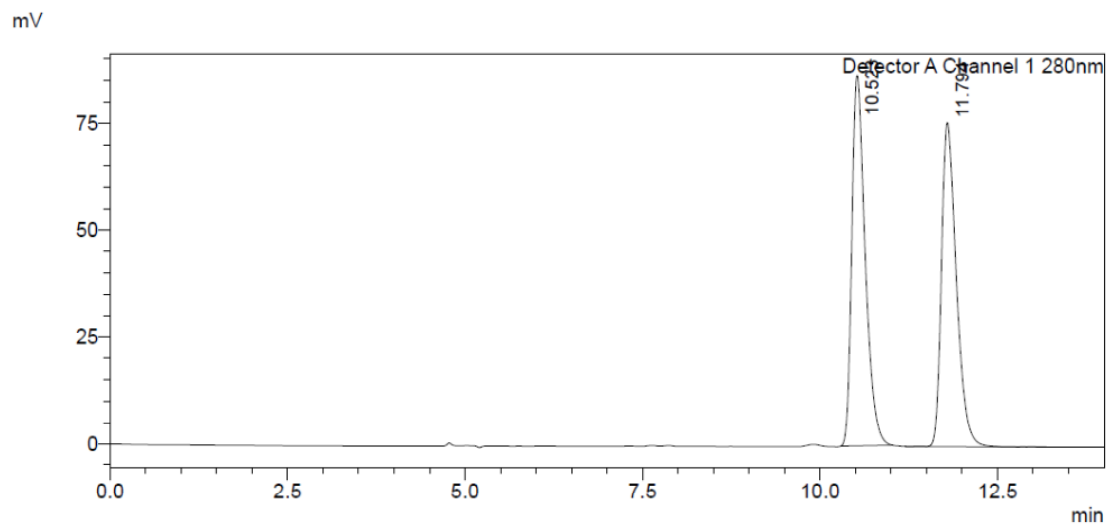

**<Peak Table>**

Detector A Channel 1 280nm

| Peak# | Ret. Time | Area    | Height | Conc.  | Unit | Mark | Name |
|-------|-----------|---------|--------|--------|------|------|------|
| 1     | 10.523    | 1133093 | 86637  | 50.661 |      | M    |      |
| 2     | 11.794    | 1103524 | 75760  | 49.339 |      | M    |      |
| Total |           | 2236616 | 162397 |        |      |      |      |

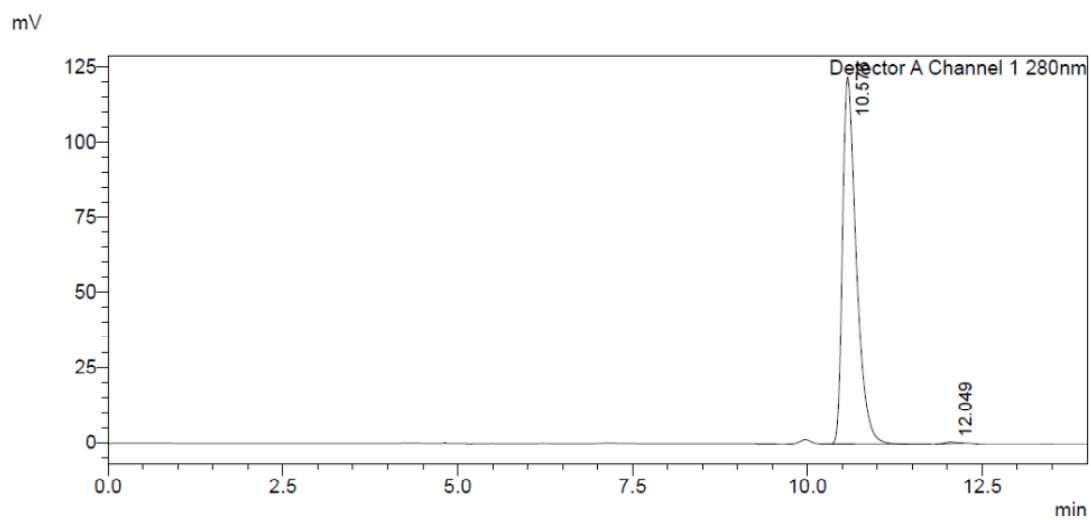

**<Peak Table>**

Detector A Channel 1 280nm

| Peak# | Ret. Time | Area    | Height | Conc.  | Unit | Mark | Name |
|-------|-----------|---------|--------|--------|------|------|------|
| 1     | 10.576    | 1663713 | 121891 | 99.679 |      | M    |      |
| 2     | 12.049    | 5364    | 495    | 0.321  |      | M    |      |
| Total |           | 1669077 | 122386 |        |      |      |      |

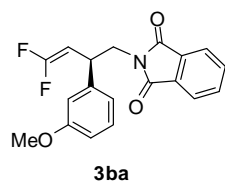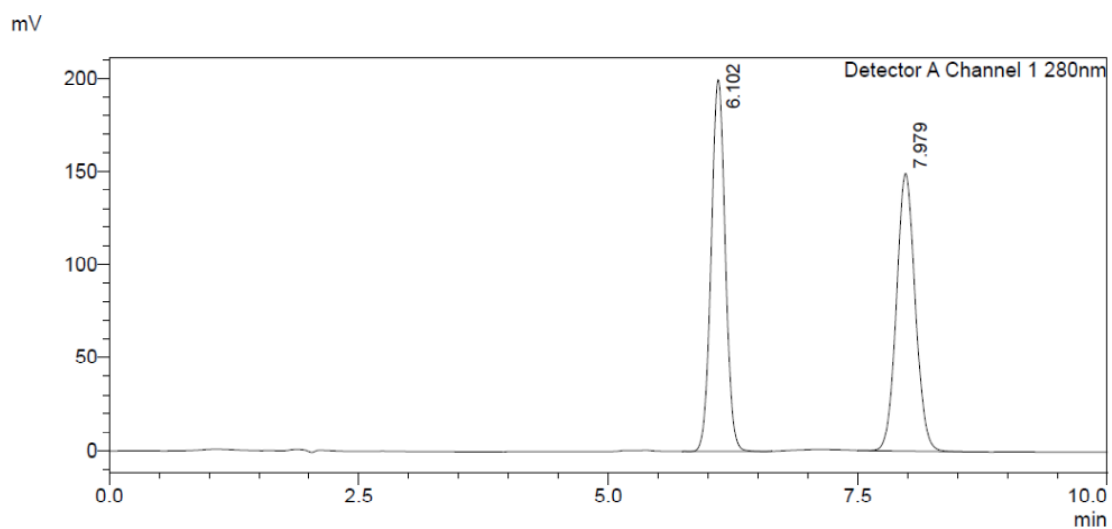

**<Peak Table>**

Detector A Channel 1 280nm

| Peak# | Ret. Time | Area    | Height | Conc.  | Unit | Mark | Name |
|-------|-----------|---------|--------|--------|------|------|------|
| 1     | 6.102     | 1951222 | 199869 | 50.025 |      | M    |      |
| 2     | 7.979     | 1949285 | 148856 | 49.975 |      | M    |      |
| Total |           | 3900507 | 348725 |        |      |      |      |

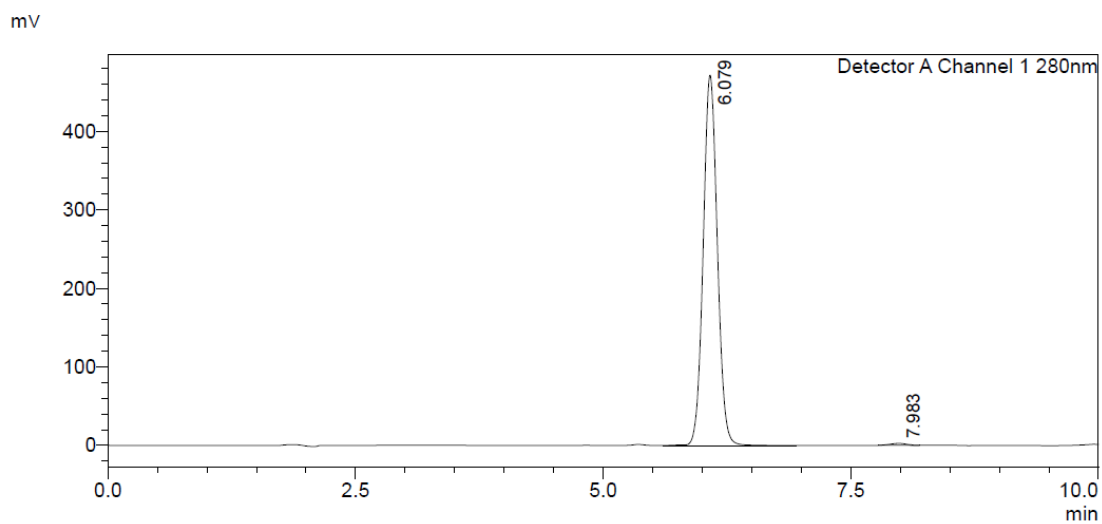

**<Peak Table>**

Detector A Channel 1 280nm

| Peak# | Ret. Time | Area    | Height | Conc.  | Unit | Mark | Name |
|-------|-----------|---------|--------|--------|------|------|------|
| 1     | 6.079     | 4679532 | 471659 | 99.384 |      | M    |      |
| 2     | 7.983     | 29016   | 2430   | 0.616  |      | M    |      |
| Total |           | 4708549 | 474089 |        |      |      |      |

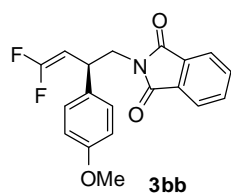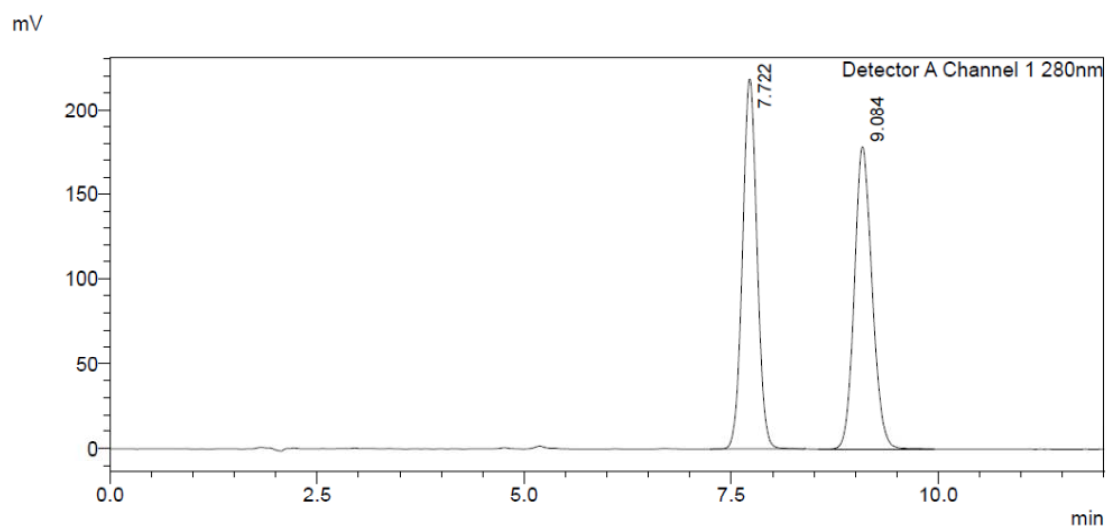

#### <Peak Table>

Detector A Channel 1 280nm

| Peak# | Ret. Time | Area    | Height | Conc.  | Unit | Mark | Name |
|-------|-----------|---------|--------|--------|------|------|------|
| 1     | 7.722     | 2658734 | 218661 | 49.999 |      | M    |      |
| 2     | 9.084     | 2658854 | 178417 | 50.001 |      | M    |      |
| Total |           | 5317588 | 397079 |        |      |      |      |

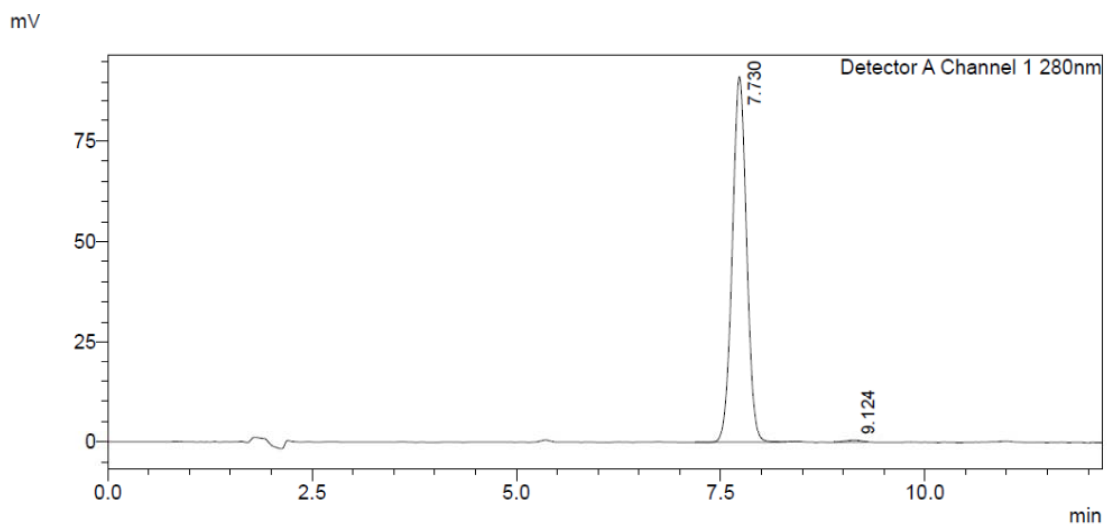

#### <Peak Table>

Detector A Channel 1 280nm

| Peak# | Ret. Time | Area    | Height | Conc.  | Unit | Mark | Name |
|-------|-----------|---------|--------|--------|------|------|------|
| 1     | 7.730     | 1110403 | 91372  | 99.499 |      | M    |      |
| 2     | 9.124     | 5595    | 452    | 0.501  |      | M    |      |
| Total |           | 1115998 | 91824  |        |      |      |      |



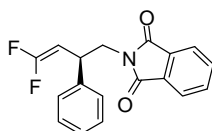

3bc

mV

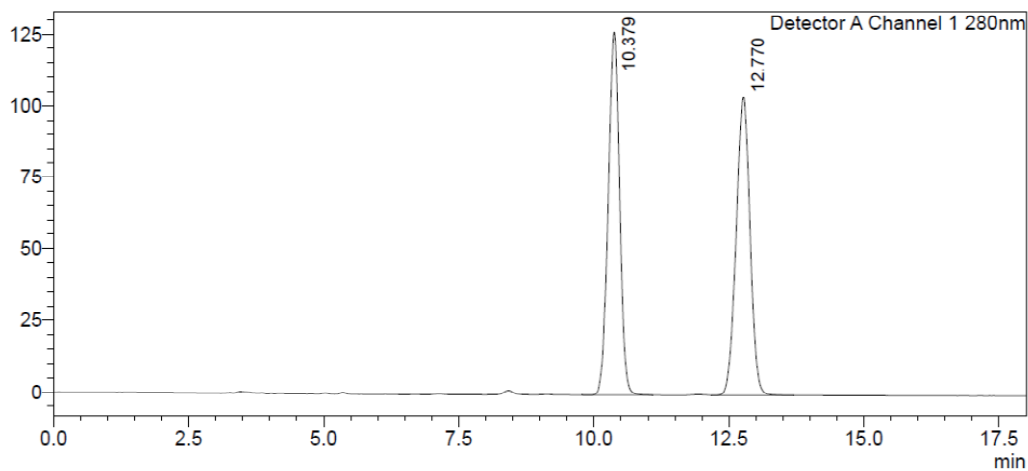

<Peak Table>

Detector A Channel 1 280nm

| Peak# | Ret. Time | Area    | Height | Conc.  | Unit | Mark | Name |
|-------|-----------|---------|--------|--------|------|------|------|
| 1     | 10.379    | 1861502 | 126752 | 49.971 |      | M    |      |
| 2     | 12.770    | 1863651 | 104242 | 50.029 |      | M    |      |
| Total |           | 3725153 | 230994 |        |      |      |      |

mV

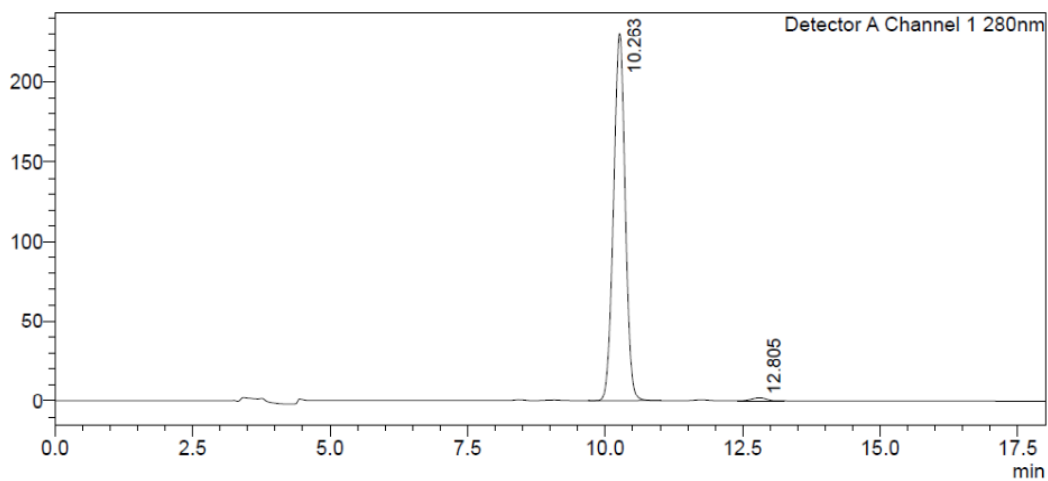

<Peak Table>

Detector A Channel 1 280nm

| Peak# | Ret. Time | Area    | Height | Conc.  | Unit | Mark | Name |
|-------|-----------|---------|--------|--------|------|------|------|
| 1     | 10.263    | 3409204 | 230457 | 99.075 |      | M    |      |
| 2     | 12.805    | 31814   | 1785   | 0.925  |      | M    |      |
| Total |           | 3441018 | 232242 |        |      |      |      |

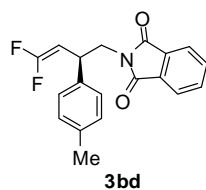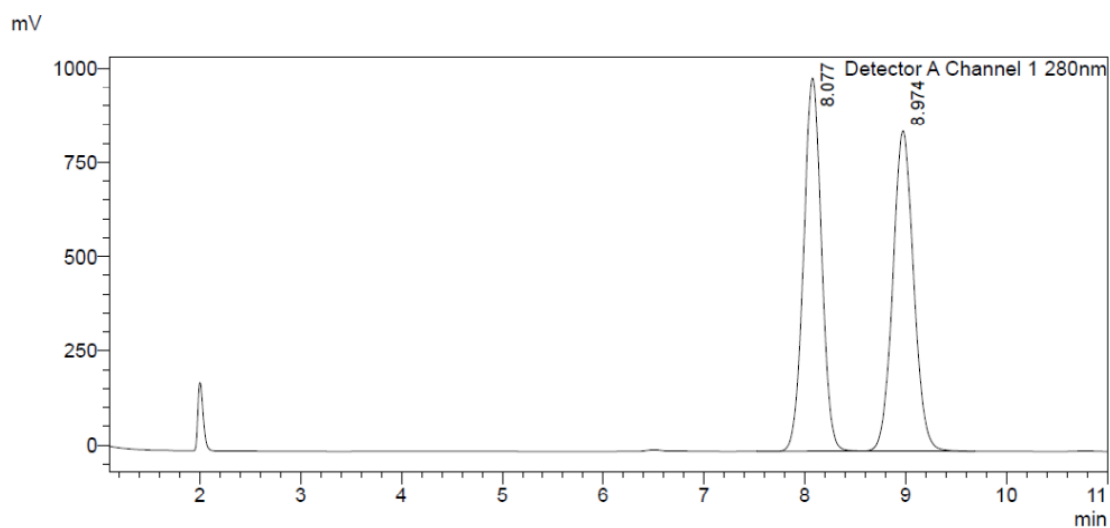

#### <Peak Table>

Detector A Channel 1 280nm

| Peak# | Ret. Time | Area     | Height  | Conc.  | Unit | Mark | Name |
|-------|-----------|----------|---------|--------|------|------|------|
| 1     | 8.077     | 12180725 | 989764  | 49.992 |      | M    |      |
| 2     | 8.974     | 12184485 | 847279  | 50.008 |      | M    |      |
| Total |           | 24365210 | 1837042 |        |      |      |      |

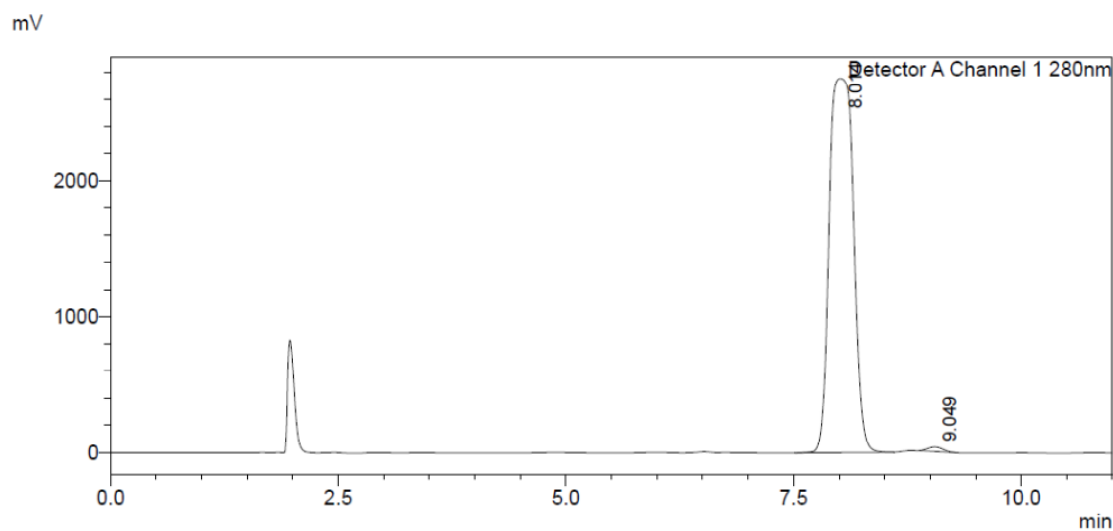

#### <Peak Table>

Detector A Channel 1 280nm

| Peak# | Ret. Time | Area     | Height  | Conc.  | Unit | Mark | Name |
|-------|-----------|----------|---------|--------|------|------|------|
| 1     | 8.014     | 50863427 | 2753754 | 99.254 |      | M    |      |
| 2     | 9.049     | 382059   | 33145   | 0.746  |      | M    |      |
| Total |           | 51245485 | 2786899 |        |      |      |      |

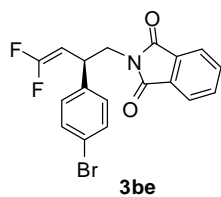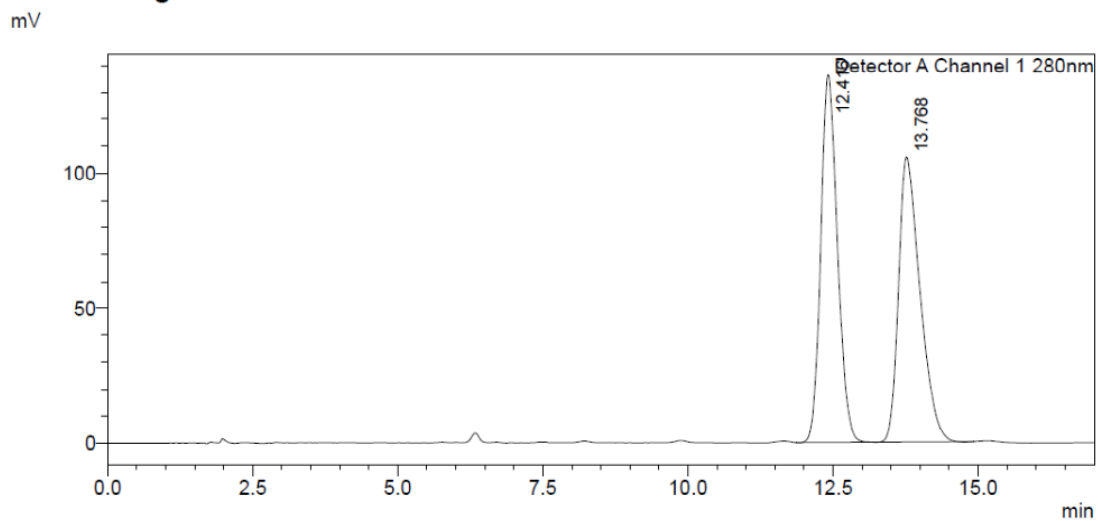

**<Peak Table>**

Detector A Channel 1 280nm

| Peak# | Ret. Time | Area    | Height | Conc.  | Unit | Mark | Name |
|-------|-----------|---------|--------|--------|------|------|------|
| 1     | 12.416    | 2723738 | 136353 | 50.101 |      | M    |      |
| 2     | 13.768    | 2712784 | 105549 | 49.899 |      | M    |      |
| Total |           | 5436522 | 241902 |        |      |      |      |

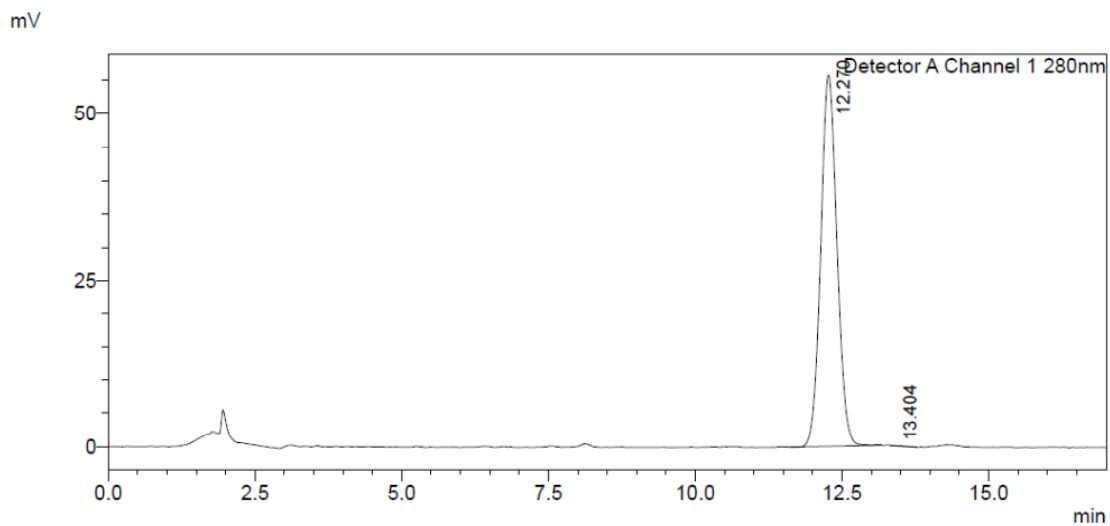

**<Peak Table>**

Detector A Channel 1 280nm

| Peak# | Ret. Time | Area    | Height | Conc.  | Unit | Mark | Name |
|-------|-----------|---------|--------|--------|------|------|------|
| 1     | 12.270    | 1072265 | 55843  | 99.975 |      | M    |      |
| 2     | 13.404    | 266     | 37     | 0.025  |      | M    |      |
| Total |           | 1072532 | 55880  |        |      |      |      |

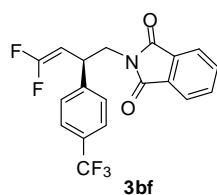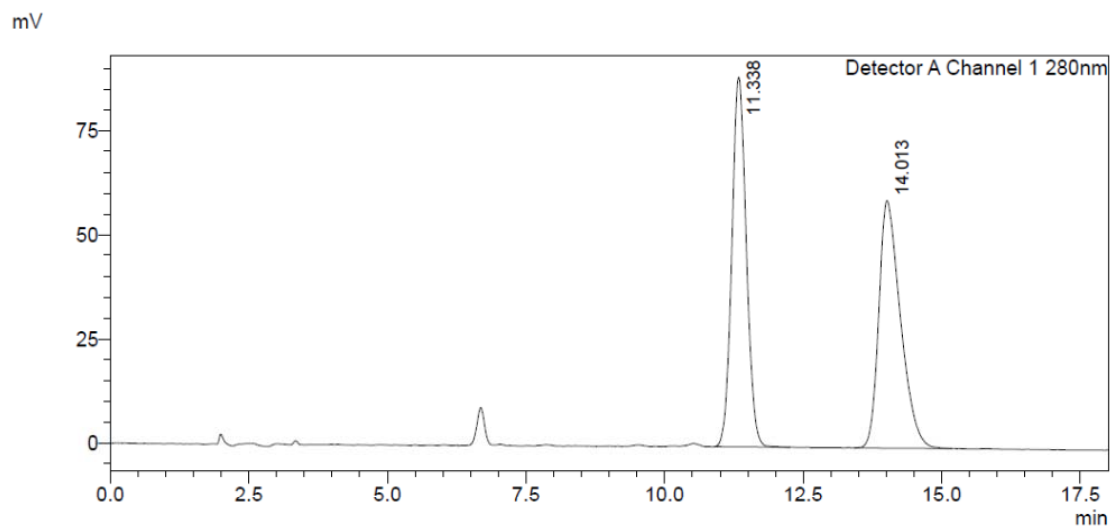

#### <Peak Table>

Detector A Channel 1 280nm

| Peak# | Ret. Time | Area    | Height | Conc.  | Unit | Mark | Name |
|-------|-----------|---------|--------|--------|------|------|------|
| 1     | 11.338    | 1610393 | 88934  | 49.932 |      | M    |      |
| 2     | 14.013    | 1614748 | 59478  | 50.068 |      | M    |      |
| Total |           | 3225141 | 148413 |        |      |      |      |

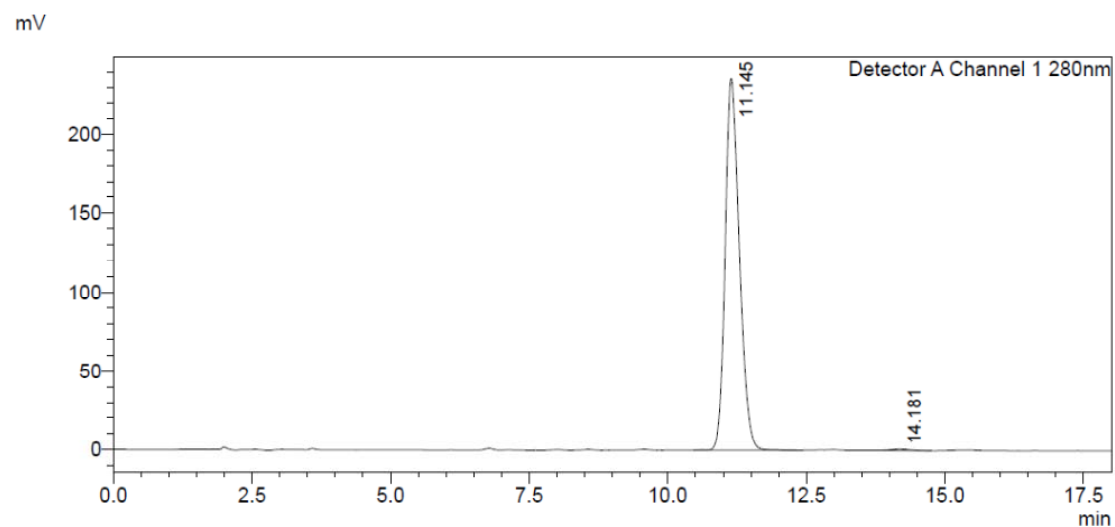

#### <Peak Table>

Detector A Channel 1 280nm

| Peak# | Ret. Time | Area    | Height | Conc.  | Unit | Mark | Name |
|-------|-----------|---------|--------|--------|------|------|------|
| 1     | 11.145    | 4223211 | 236475 | 99.506 |      | M    |      |
| 2     | 14.181    | 20981   | 938    | 0.494  |      | M    |      |
| Total |           | 4244192 | 237413 |        |      |      |      |

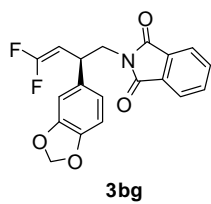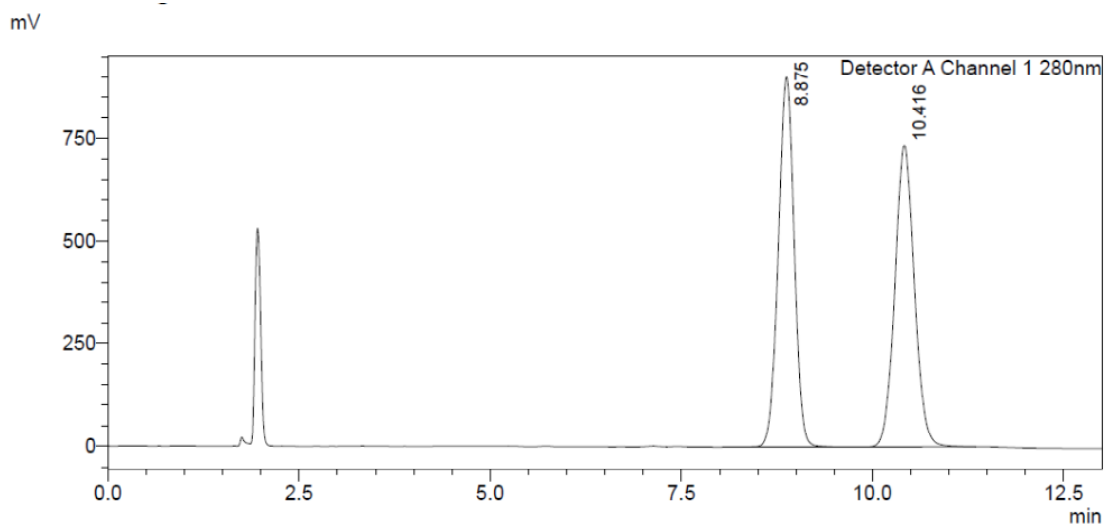

**<Peak Table>**

Detector A Channel 1 280nm

| Peak# | Ret. Time | Area     | Height  | Conc.  | Unit | Mark | Name |
|-------|-----------|----------|---------|--------|------|------|------|
| 1     | 8.875     | 13039089 | 902707  | 49.919 |      | M    |      |
| 2     | 10.416    | 13081154 | 734479  | 50.081 |      | M    |      |
| Total |           | 26120243 | 1637186 |        |      |      |      |

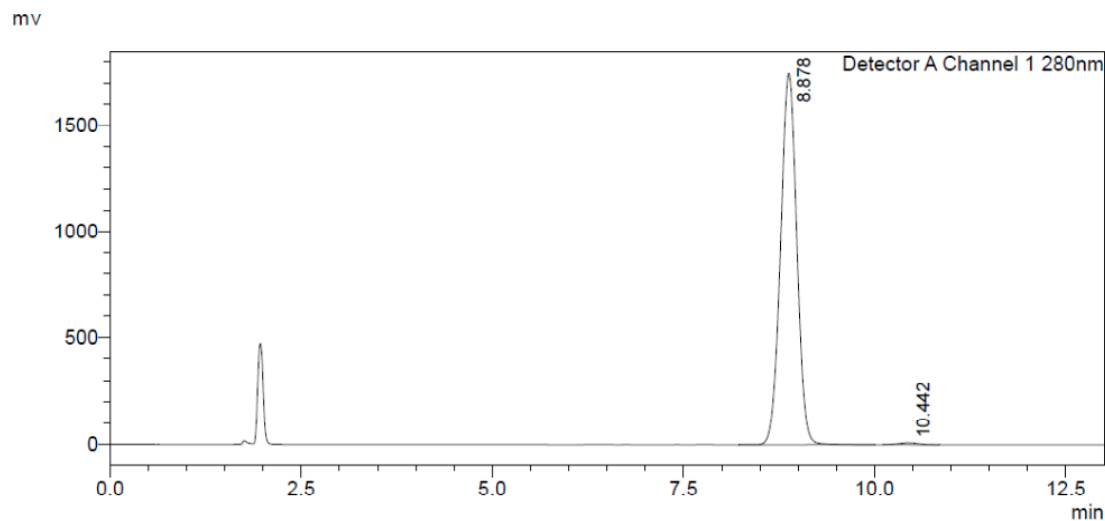

**<Peak Table>**

Detector A Channel 1 280nm

| Peak# | Ret. Time | Area     | Height  | Conc.  | Unit | Mark | Name |
|-------|-----------|----------|---------|--------|------|------|------|
| 1     | 8.878     | 25781118 | 1746772 | 99.405 |      | M    |      |
| 2     | 10.442    | 154251   | 8769    | 0.595  |      | M    |      |
| Total |           | 25935369 | 1755541 |        |      |      |      |

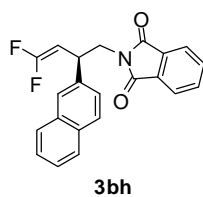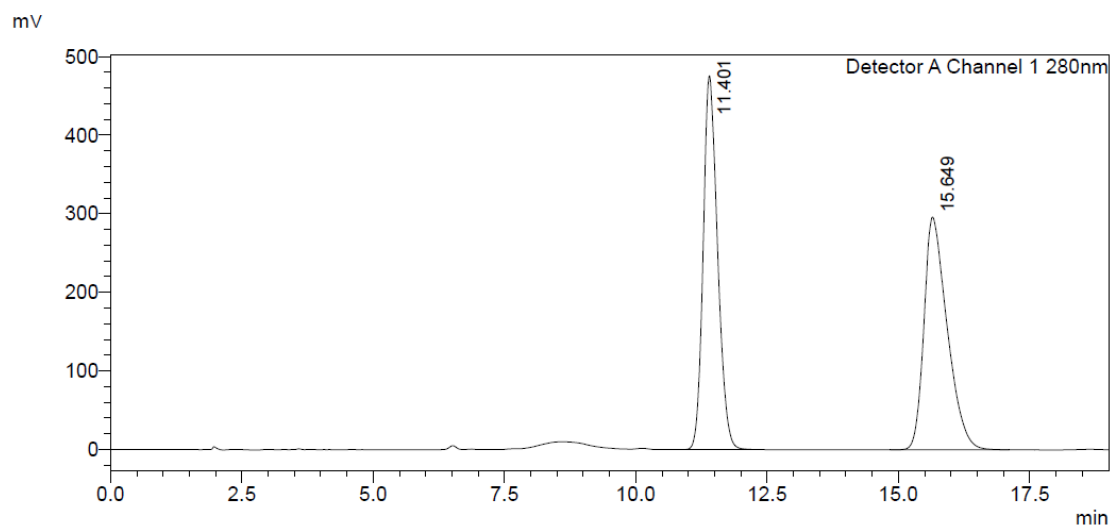

#### <Peak Table>

Detector A Channel 1 280nm

| Peak# | Ret. Time | Area     | Height | Conc.  | Unit | Mark | Name |
|-------|-----------|----------|--------|--------|------|------|------|
| 1     | 11.401    | 9085482  | 475459 | 49.961 |      | M    |      |
| 2     | 15.649    | 9099843  | 296032 | 50.039 |      | M    |      |
| Total |           | 18185325 | 771491 |        |      |      |      |

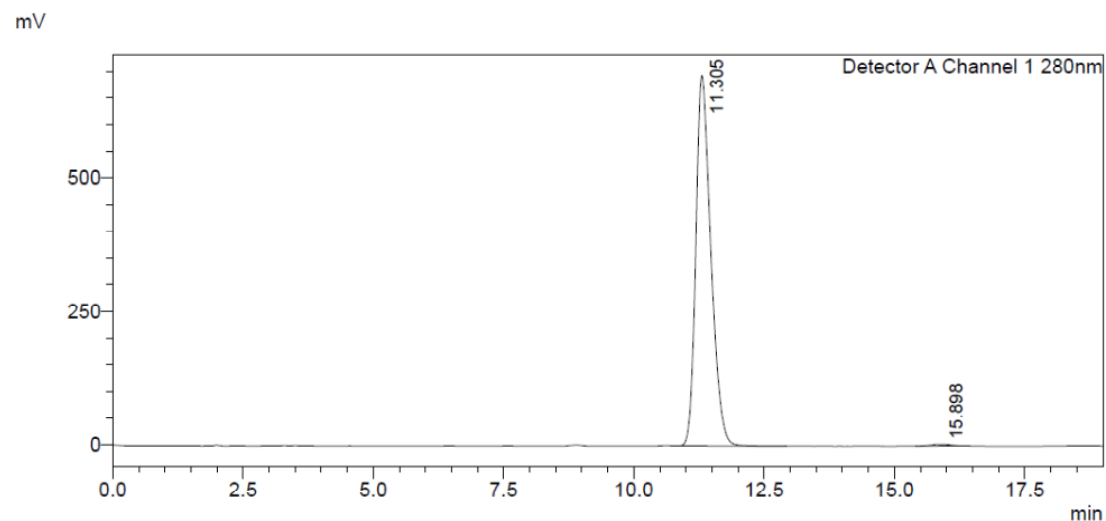

#### <Peak Table>

Detector A Channel 1 280nm

| Peak# | Ret. Time | Area     | Height | Conc.  | Unit | Mark | Name |
|-------|-----------|----------|--------|--------|------|------|------|
| 1     | 11.305    | 13932685 | 694867 | 99.428 |      | M    |      |
| 2     | 15.898    | 80132    | 3153   | 0.572  |      | M    |      |
| Total |           | 14012817 | 698020 |        |      |      |      |

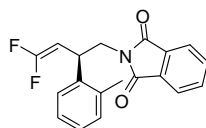

3bi

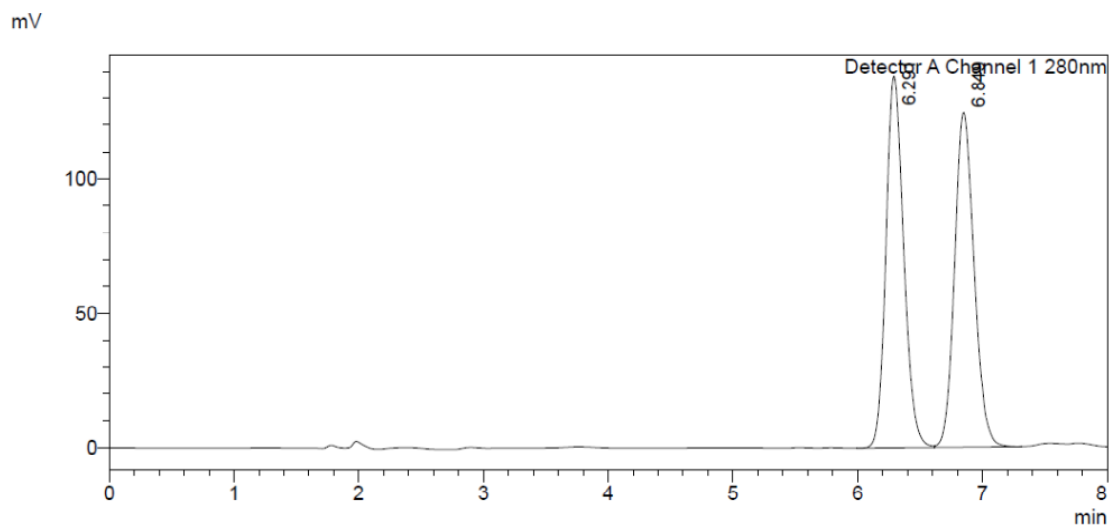

### <Peak Table>

Detector A Channel 1 280nm

| Peak# | Ret. Time | Area    | Height | Conc.  | Unit | Mark | Name |
|-------|-----------|---------|--------|--------|------|------|------|
| 1     | 6.291     | 1367153 | 138507 | 50.211 |      | M    |      |
| 2     | 6.849     | 1355665 | 124651 | 49.789 |      | V M  |      |
| Total |           | 2722819 | 263158 |        |      |      |      |

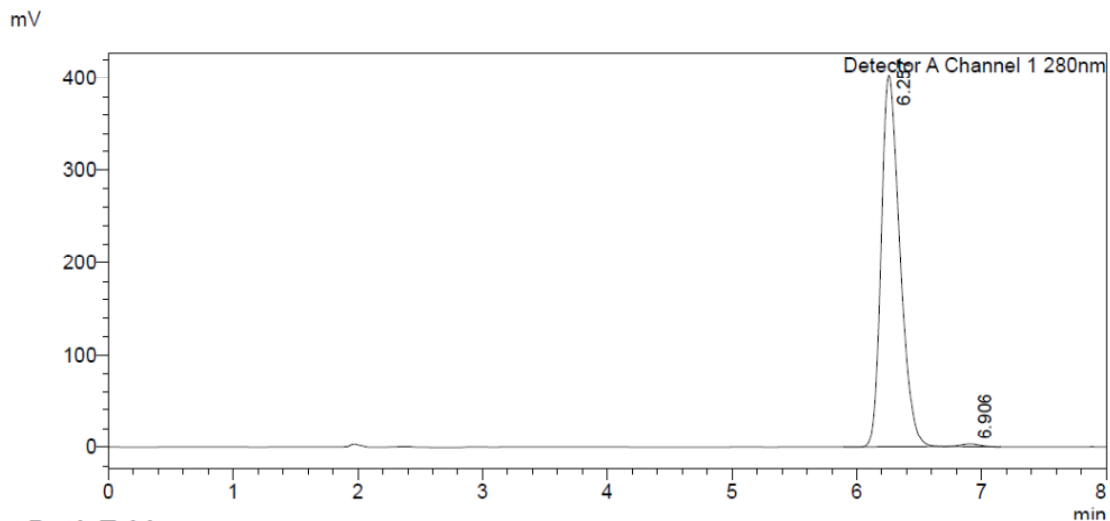

### <Peak Table>

Detector A Channel 1 280nm

| Peak# | Ret. Time | Area    | Height | Conc.  | Unit | Mark | Name |
|-------|-----------|---------|--------|--------|------|------|------|
| 1     | 6.257     | 4192521 | 403505 | 99.279 |      | M    |      |
| 2     | 6.906     | 30459   | 2879   | 0.721  |      | M    |      |
| Total |           | 4222980 | 406384 |        |      |      |      |

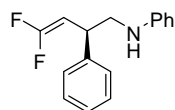

3cc

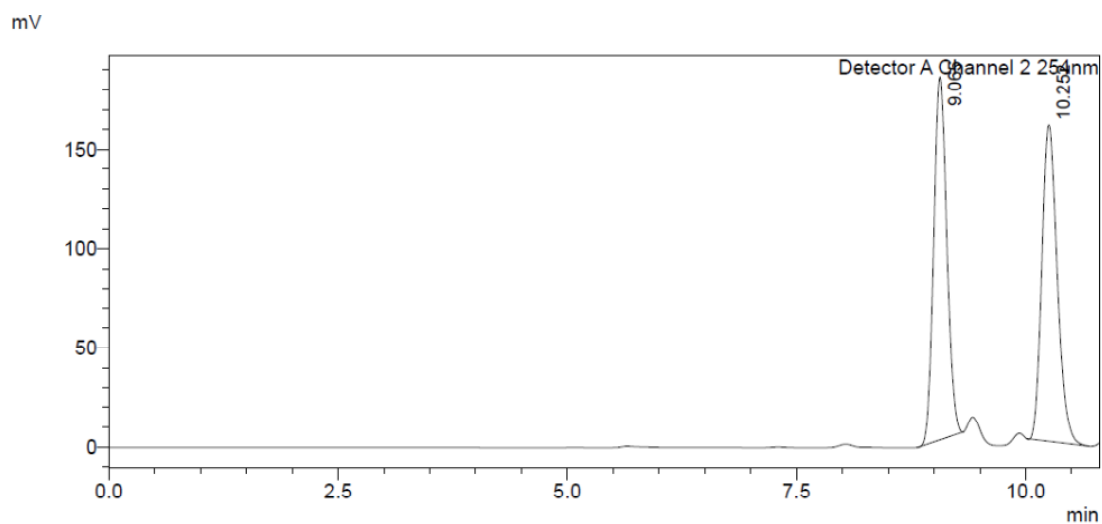

<Peak Table>

Detector A Channel 2 254nm

| Peak# | Ret. Time | Area    | Height | Conc.  | Unit | Mark | Name |
|-------|-----------|---------|--------|--------|------|------|------|
| 1     | 9.065     | 1815523 | 182867 | 49.420 |      | M    |      |
| 2     | 10.252    | 1858100 | 159557 | 50.580 |      | M    |      |
| Total |           | 3673623 | 342424 |        |      |      |      |

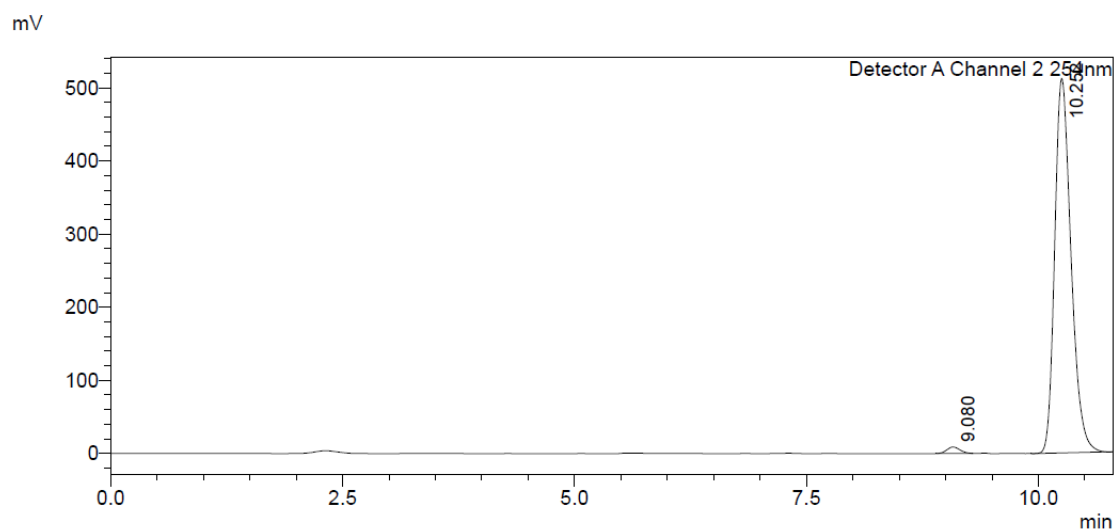

<Peak Table>

Detector A Channel 2 254nm

| Peak# | Ret. Time | Area    | Height | Conc.  | Unit | Mark | Name |
|-------|-----------|---------|--------|--------|------|------|------|
| 1     | 9.080     | 85668   | 8762   | 1.348  |      | M    |      |
| 2     | 10.252    | 6271650 | 512357 | 98.652 |      | M    |      |
| Total |           | 6357318 | 521118 |        |      |      |      |



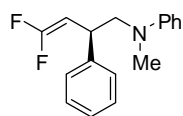

**3dc**

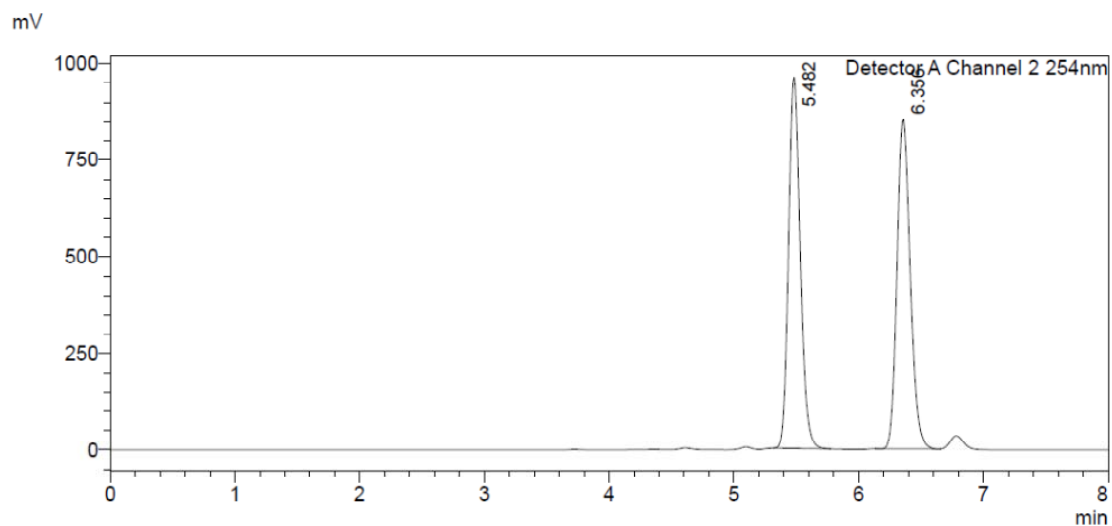

**<Peak Table>**

Detector A Channel 2 254nm

| Peak# | Ret. Time | Area     | Height  | Conc.  | Unit | Mark | Name |
|-------|-----------|----------|---------|--------|------|------|------|
| 1     | 5.482     | 6299548  | 962577  | 50.034 |      | M    |      |
| 2     | 6.356     | 6290916  | 855120  | 49.966 |      | M    |      |
| Total |           | 12590464 | 1817698 |        |      |      |      |

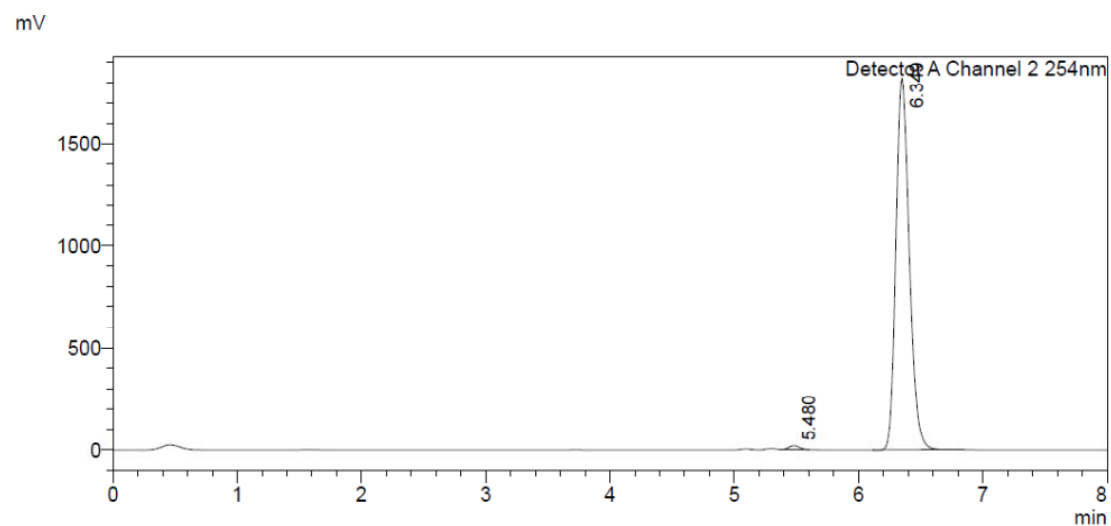

**<Peak Table>**

Detector A Channel 2 254nm

| Peak# | Ret. Time | Area     | Height  | Conc.  | Unit | Mark | Name |
|-------|-----------|----------|---------|--------|------|------|------|
| 1     | 5.480     | 110740   | 18985   | 0.805  |      | M    |      |
| 2     | 6.349     | 13651318 | 1822772 | 99.195 |      | M    |      |
| Total |           | 13762057 | 1841756 |        |      |      |      |

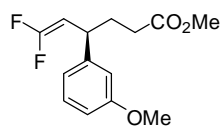

**3ea**

mV

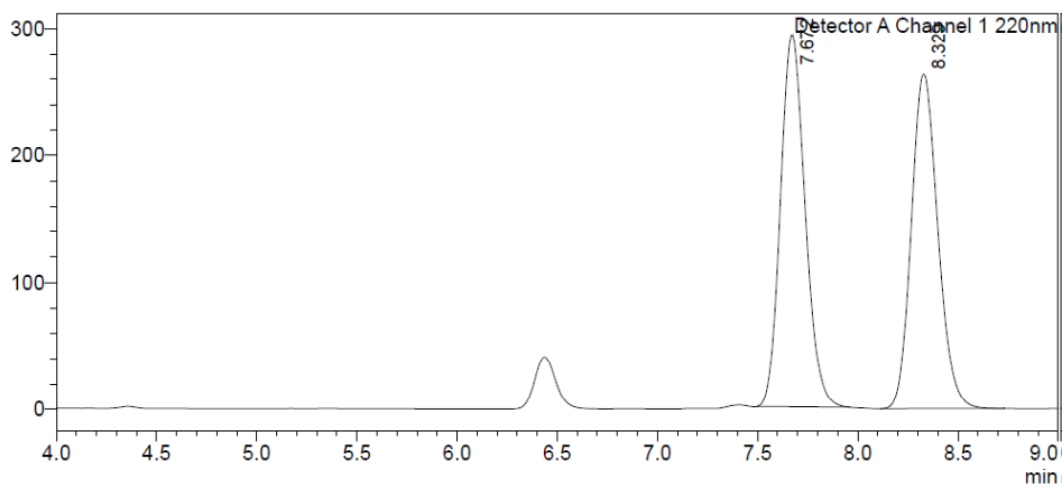

### <Peak Table>

Detector A Channel 1 220nm

| Peak# | Ret. Time | Area    | Height | Conc.  | Unit | Mark | Name |
|-------|-----------|---------|--------|--------|------|------|------|
| 1     | 7.672     | 2502178 | 293407 | 50.726 |      | M    |      |
| 2     | 8.329     | 2430535 | 263760 | 49.274 |      | M    |      |
| Total |           | 4932713 | 557167 |        |      |      |      |

mV

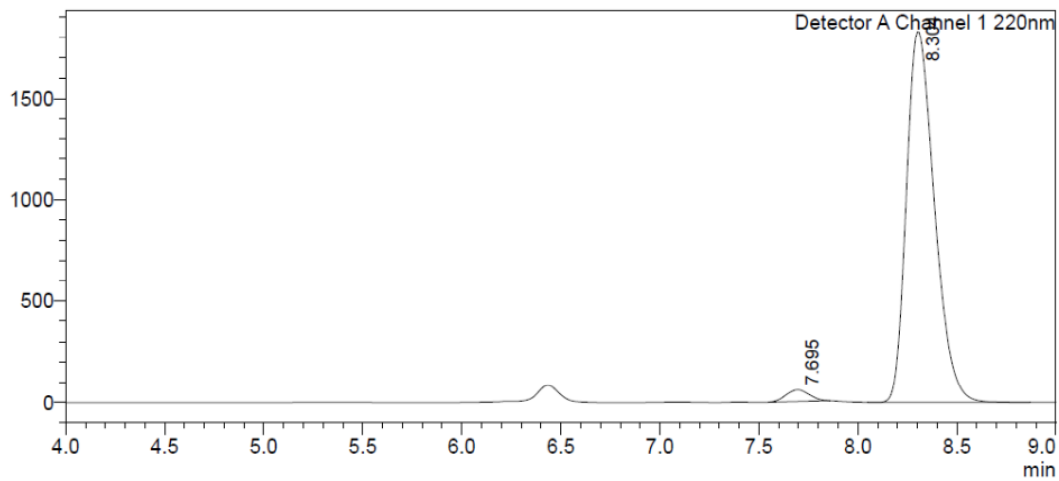

### <Peak Table>

Detector A Channel 1 220nm

| Peak# | Ret. Time | Area     | Height  | Conc.  | Unit | Mark | Name |
|-------|-----------|----------|---------|--------|------|------|------|
| 1     | 7.695     | 473763   | 57847   | 2.561  |      | M    |      |
| 2     | 8.304     | 18024341 | 1826824 | 97.439 |      | M    |      |
| Total |           | 18498104 | 1884671 |        |      |      |      |

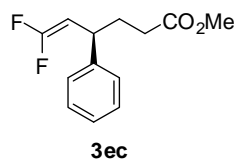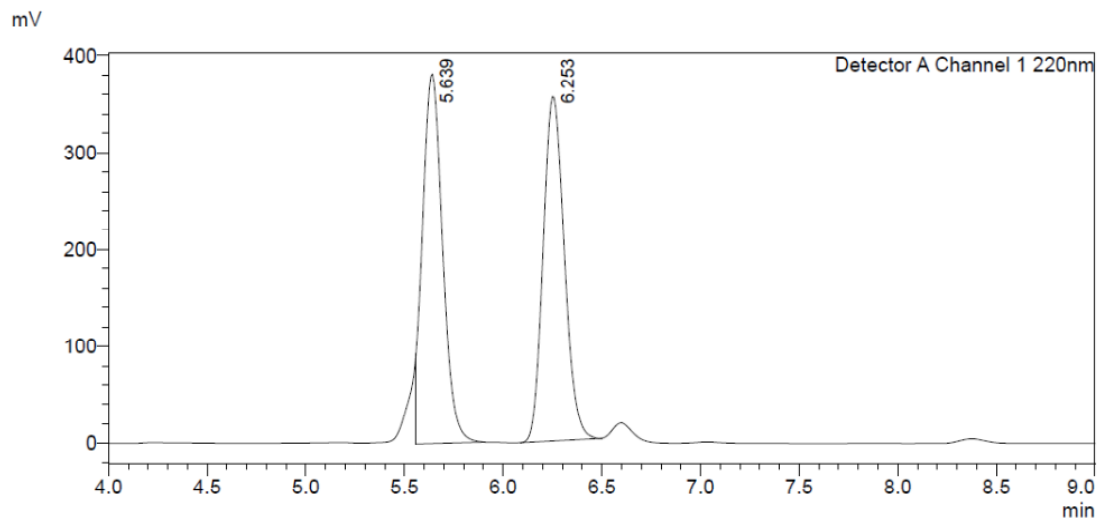

**<Peak Table>**

Detector A Channel 1 220nm

| Peak# | Ret. Time | Area    | Height | Conc.  | Unit | Mark | Name |
|-------|-----------|---------|--------|--------|------|------|------|
| 1     | 5.639     | 2661151 | 381404 | 50.047 |      | M    |      |
| 2     | 6.253     | 2656166 | 355424 | 49.953 |      | M    |      |
| Total |           | 5317317 | 736827 |        |      |      |      |

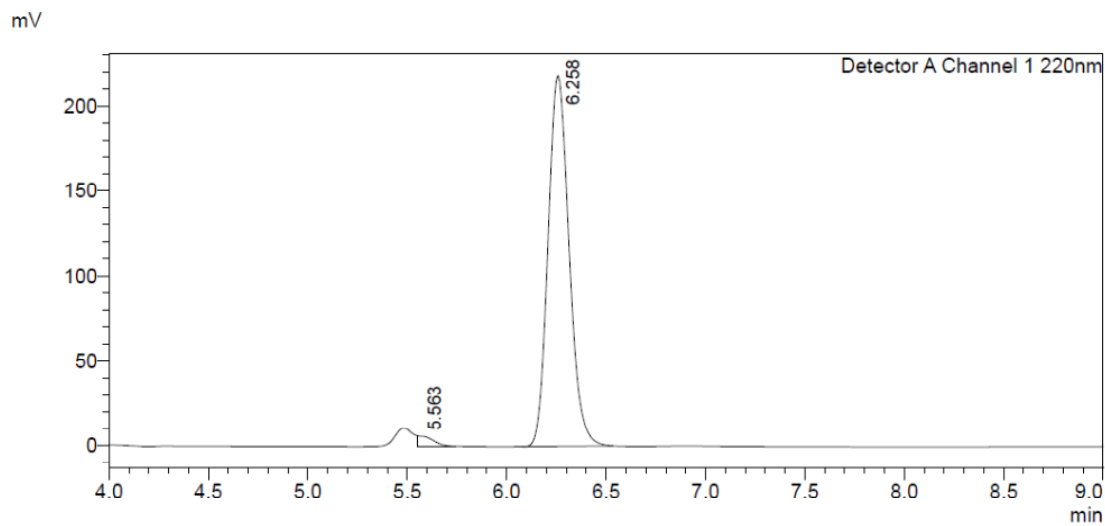

**<Peak Table>**

Detector A Channel 1 220nm

| Peak# | Ret. Time | Area    | Height | Conc.  | Unit | Mark | Name |
|-------|-----------|---------|--------|--------|------|------|------|
| 1     | 5.563     | 32431   | 6111   | 1.978  |      | M    |      |
| 2     | 6.258     | 1607100 | 218779 | 98.022 |      | M    |      |
| Total |           | 1639531 | 224890 |        |      |      |      |

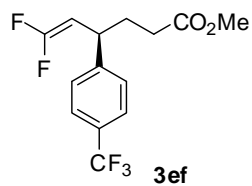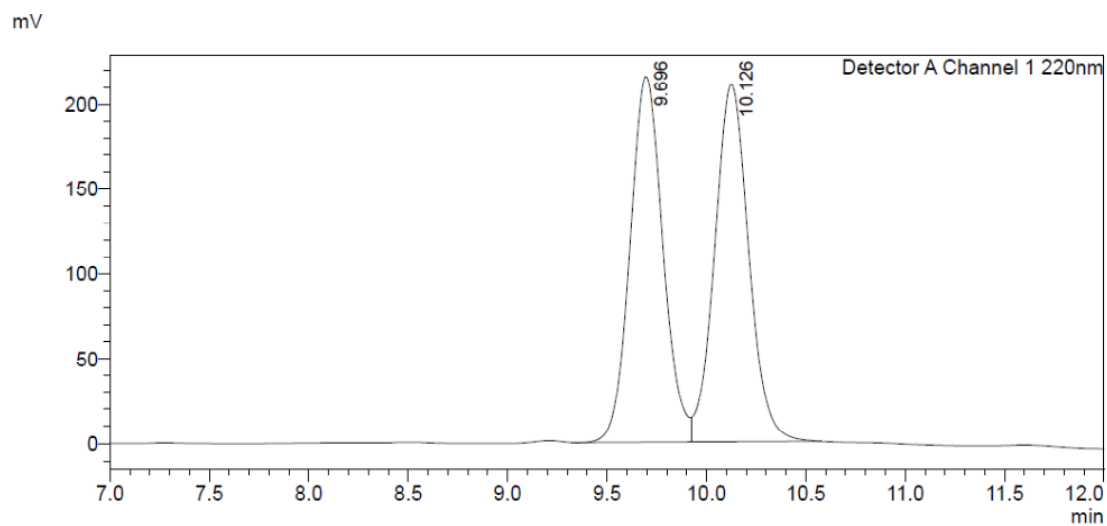

# <Peak Table>

Detector A Channel 1 220nm

| Peak# | Ret. Time | Area    | Height | Conc.  | Unit | Mark | Name |
|-------|-----------|---------|--------|--------|------|------|------|
| 1     | 9.696     | 2487720 | 215896 | 49.739 |      | M    |      |
| 2     | 10.126    | 2513794 | 211226 | 50.261 |      | V M  |      |
| Total |           | 5001514 | 427122 |        |      |      |      |

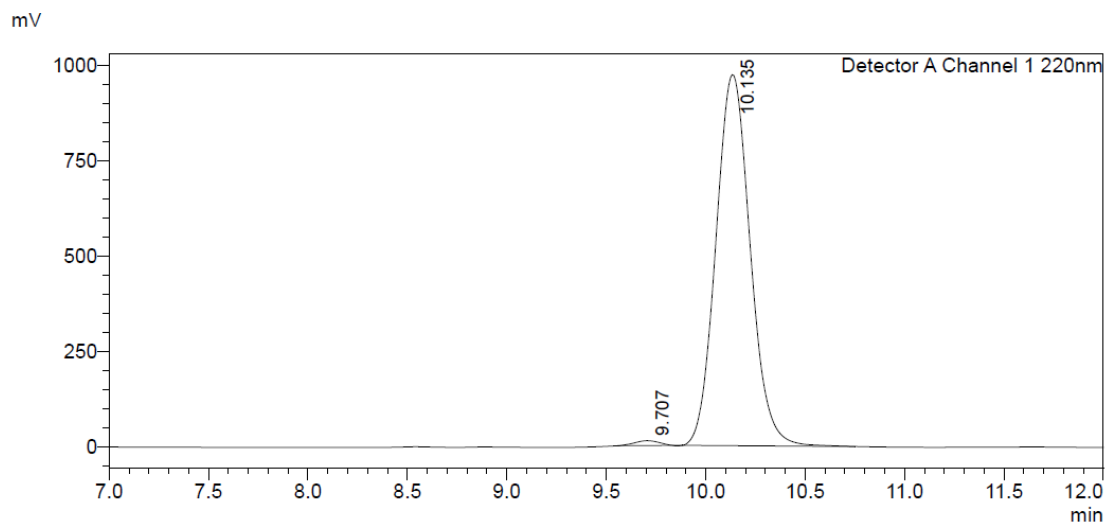

# <Peak Table>

Detector A Channel 1 220nm

| Peak# | Ret. Time | Area     | Height | Conc.  | Unit | Mark | Name |
|-------|-----------|----------|--------|--------|------|------|------|
| 1     | 9.707     | 107143   | 12762  | 0.910  |      | M    |      |
| 2     | 10.135    | 11660498 | 972042 | 99.090 |      | M    |      |
| Total |           | 11767641 | 984804 |        |      |      |      |

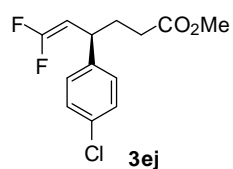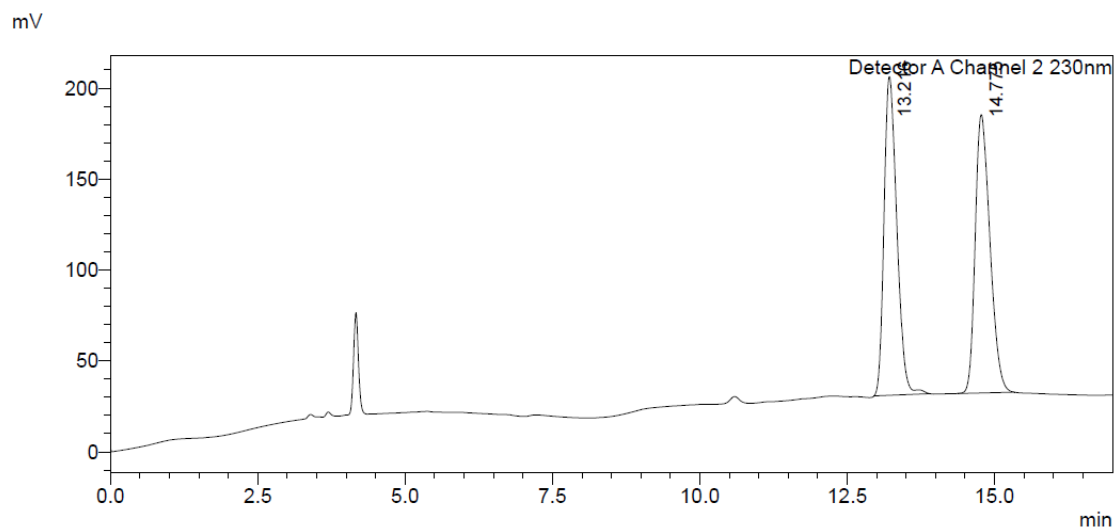

**<Peak Table>**

Detector A Channel 2 230nm

| Peak# | Ret. Time | Area    | Height | Conc.  | Unit | Mark | Name |
|-------|-----------|---------|--------|--------|------|------|------|
| 1     | 13.216    | 2646899 | 175270 | 49.806 |      | M    |      |
| 2     | 14.775    | 2667569 | 153029 | 50.194 |      | M    |      |
| Total |           | 5314468 | 328299 |        |      |      |      |

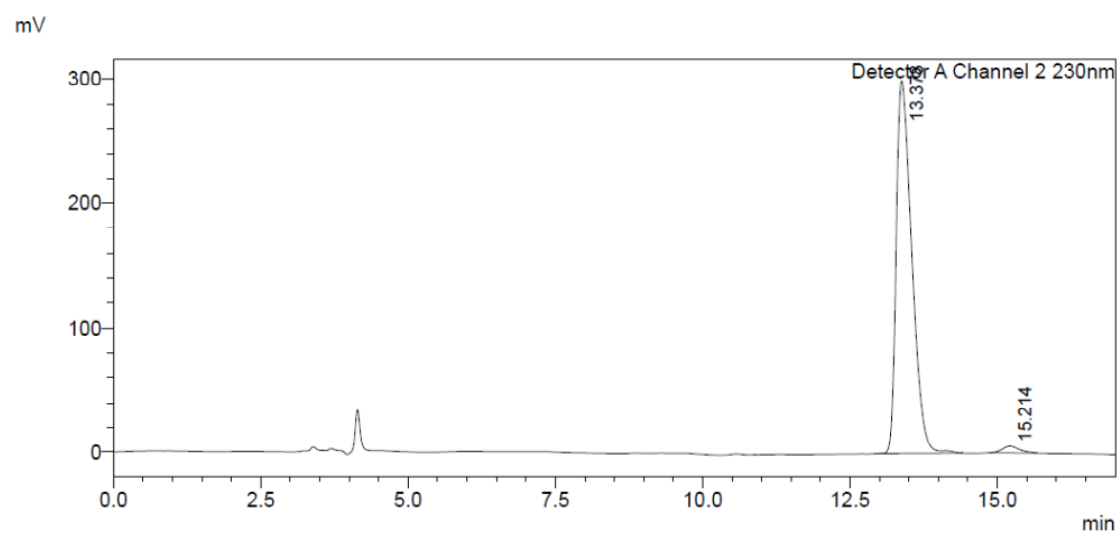

**<Peak Table>**

Detector A Channel 2 230nm

| Peak# | Ret. Time | Area    | Height | Conc.  | Unit | Mark | Name |
|-------|-----------|---------|--------|--------|------|------|------|
| 1     | 13.378    | 5522722 | 299902 | 98.079 |      | M    |      |
| 2     | 15.214    | 108182  | 5376   | 1.921  |      | M    |      |
| Total |           | 5630904 | 305279 |        |      |      |      |

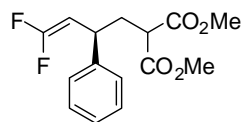

**3fc**

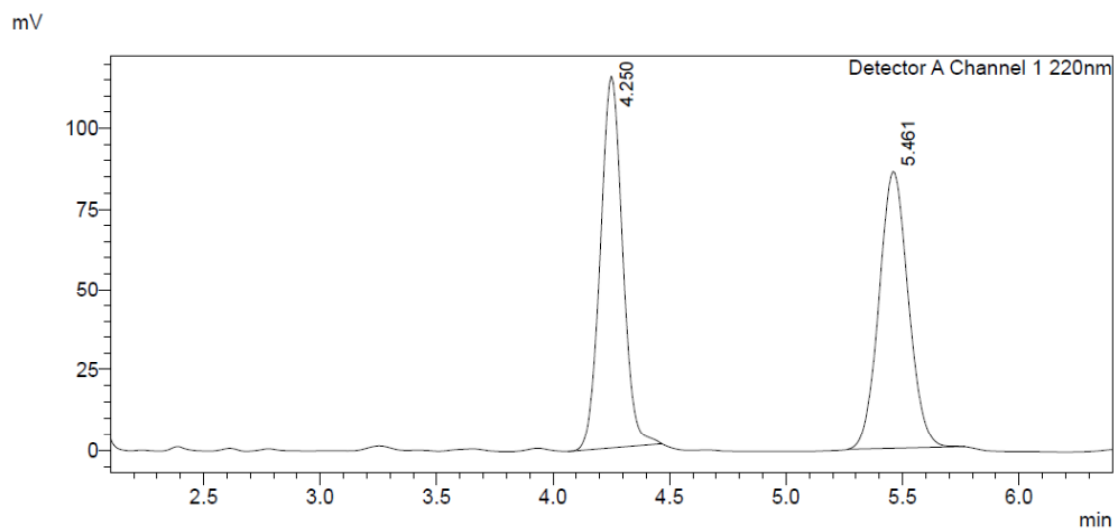

**<Peak Table>**

Detector A Channel 1 220nm

| Peak# | Ret. Time | Area    | Height | Conc.  | Unit | Mark | Name |
|-------|-----------|---------|--------|--------|------|------|------|
| 1     | 4.250     | 766469  | 115325 | 50.494 |      | M    |      |
| 2     | 5.461     | 751470  | 86090  | 49.506 |      | M    |      |
| Total |           | 1517938 | 201415 |        |      |      |      |

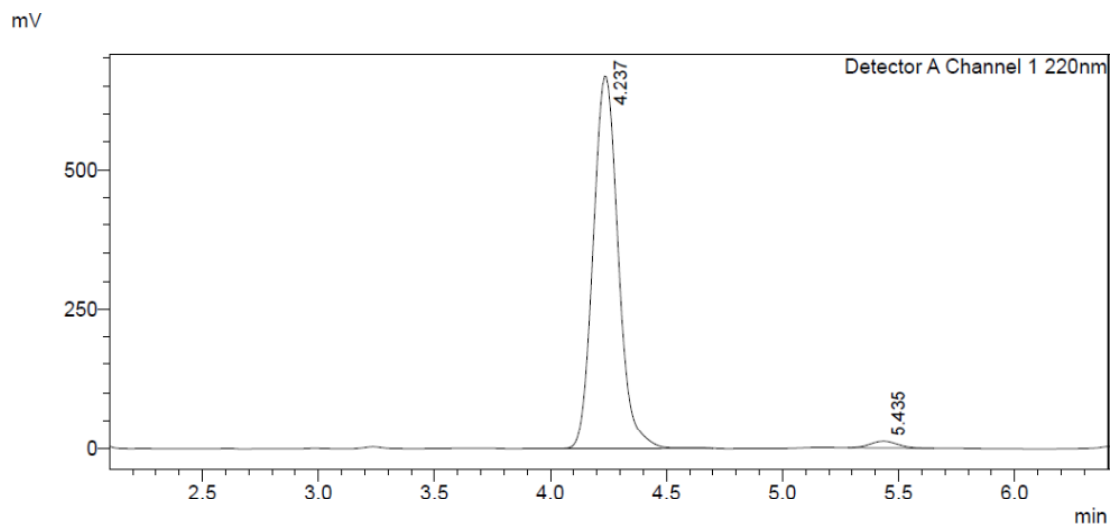

**<Peak Table>**

Detector A Channel 1 220nm

| Peak# | Ret. Time | Area    | Height | Conc.  | Unit | Mark | Name |
|-------|-----------|---------|--------|--------|------|------|------|
| 1     | 4.237     | 5002141 | 668799 | 98.148 |      | M    |      |
| 2     | 5.435     | 94379   | 11699  | 1.852  |      | M    |      |
| Total |           | 5096520 | 680498 |        |      |      |      |

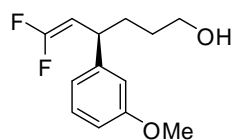

**3ga**

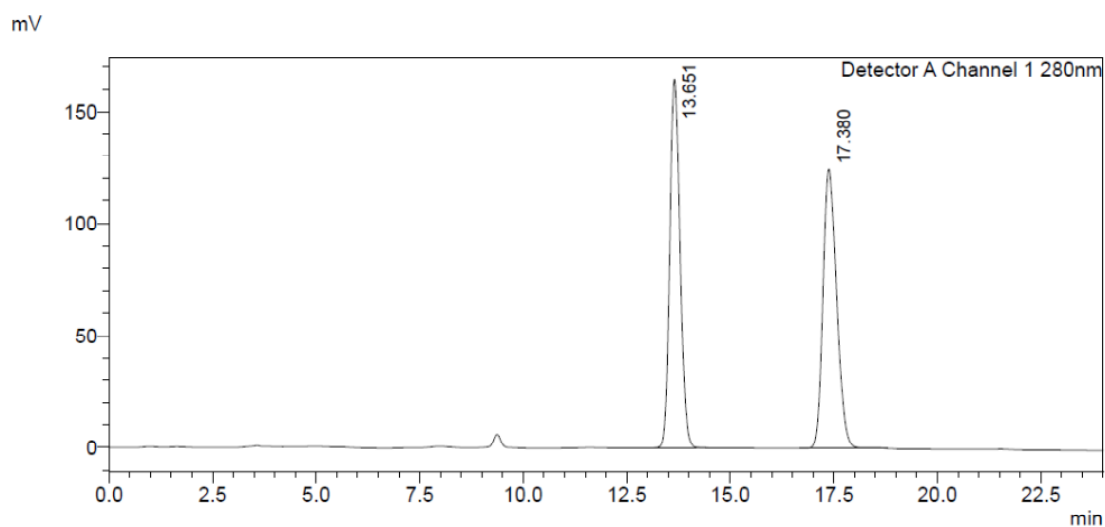

**<Peak Table>**

Detector A Channel 1 280nm

| Peak# | Ret. Time | Area    | Height | Conc.  | Unit | Mark | Name |
|-------|-----------|---------|--------|--------|------|------|------|
| 1     | 13.651    | 2849577 | 164954 | 49.811 |      | M    |      |
| 2     | 17.380    | 2871212 | 124509 | 50.189 |      | M    |      |
| Total |           | 5720789 | 289464 |        |      |      |      |

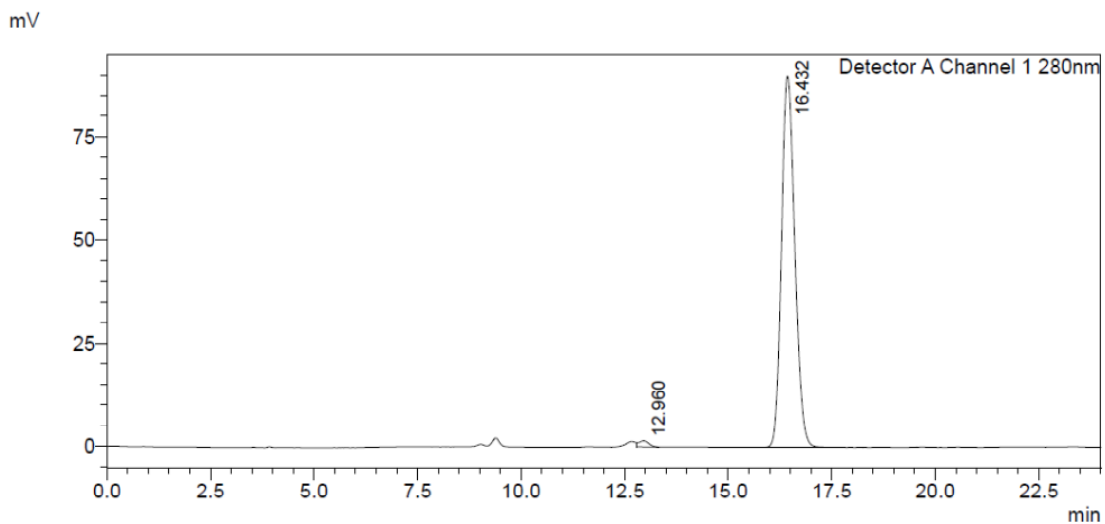

**<Peak Table>**

Detector A Channel 1 280nm

| Peak# | Ret. Time | Area    | Height | Conc.  | Unit | Mark | Name |
|-------|-----------|---------|--------|--------|------|------|------|
| 1     | 12.960    | 23521   | 1429   | 1.156  |      | M    |      |
| 2     | 16.432    | 2010947 | 90134  | 98.844 |      | M    |      |
| Total |           | 2034469 | 91562  |        |      |      |      |

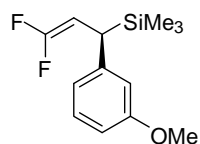

**3ha**

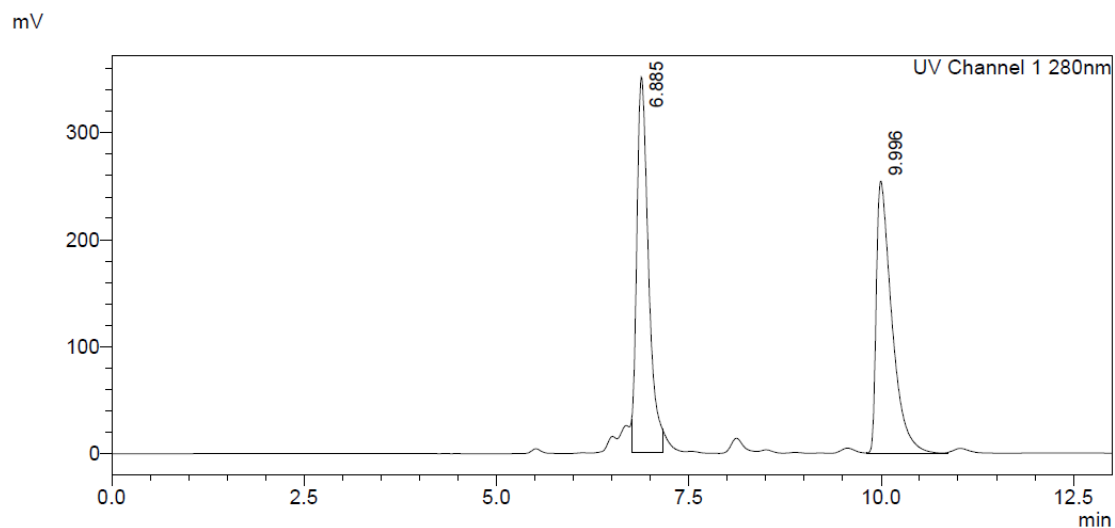

**<Peak Table>**

UV Channel 1 280nm

| Peak# | Ret. Time | Area    | Height | Conc.  | Unit | Mark | Name |
|-------|-----------|---------|--------|--------|------|------|------|
| 1     | 6.885     | 3689543 | 350815 | 50.441 |      | M    |      |
| 2     | 9.996     | 3625079 | 255117 | 49.559 |      | M    |      |
| Total |           | 7314622 | 605932 |        |      |      |      |

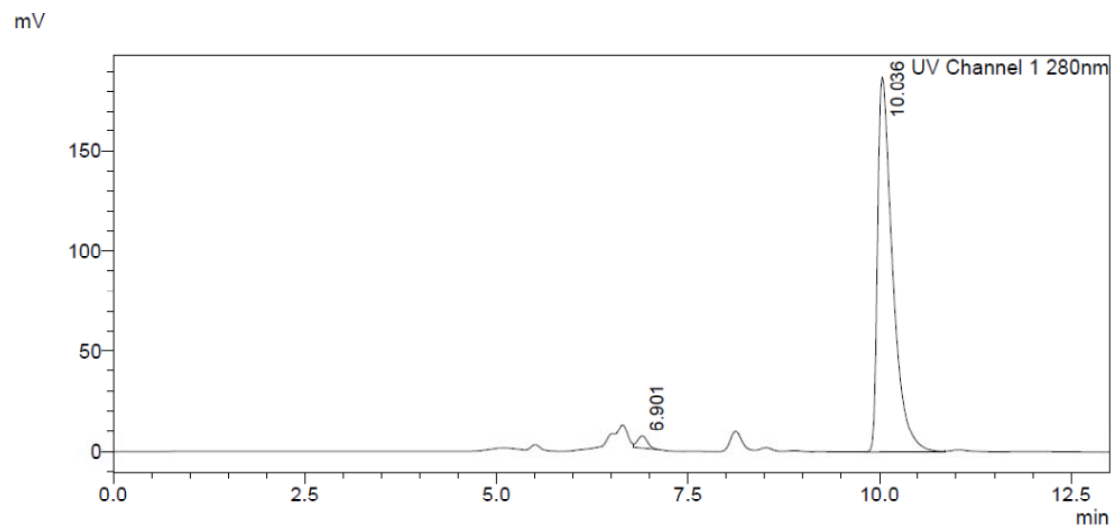

**<Peak Table>**

UV Channel 1 280nm

| Peak# | Ret. Time | Area    | Height | Conc.  | Unit | Mark | Name |
|-------|-----------|---------|--------|--------|------|------|------|
| 1     | 6.901     | 51881   | 5879   | 2.002  |      | M    |      |
| 2     | 10.036    | 2539657 | 187499 | 97.998 |      | M    |      |
| Total |           | 2591538 | 193378 |        |      |      |      |



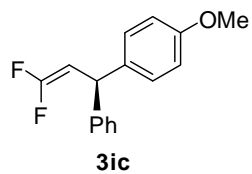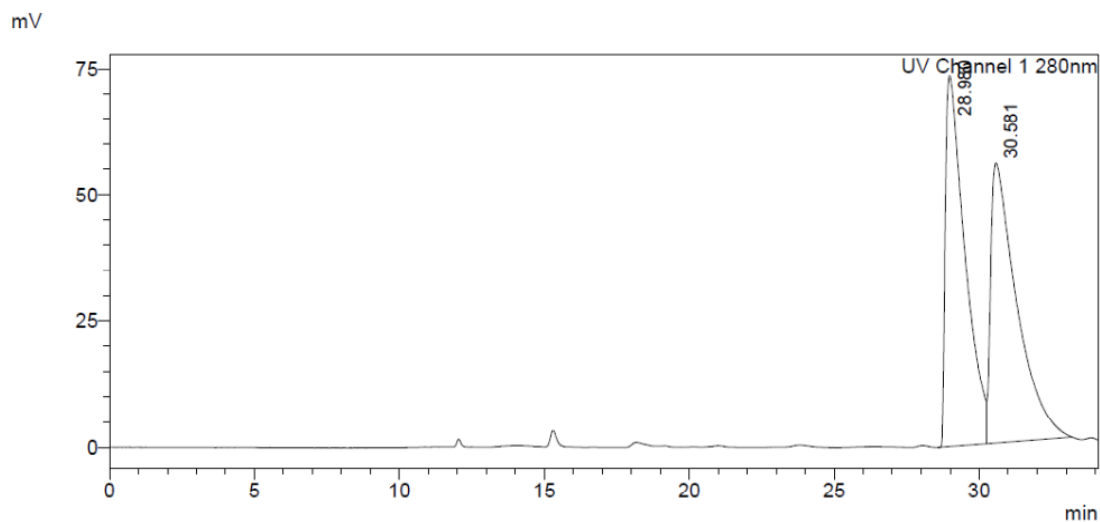

**<Peak Table>**

UV Channel 1 280nm

| Peak# | Ret. Time | Area    | Height | Conc.  | Unit | Mark | Name |
|-------|-----------|---------|--------|--------|------|------|------|
| 1     | 28.980    | 3442216 | 73523  | 49.890 |      | M    |      |
| 2     | 30.581    | 3457347 | 55316  | 50.110 |      | V M  |      |
| Total |           | 6899563 | 128839 |        |      |      |      |

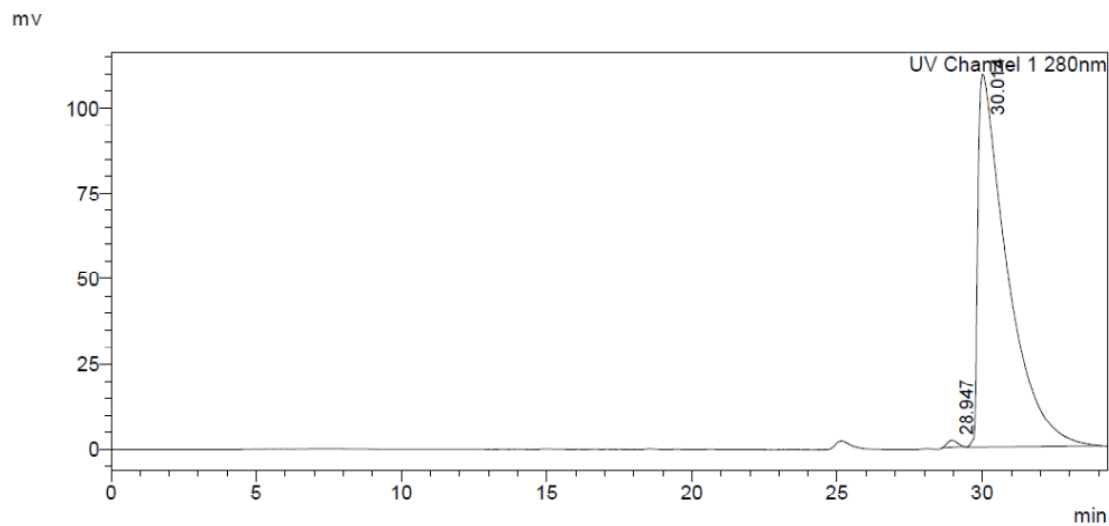

**<Peak Table>**

UV Channel 1 280nm

| Peak# | Ret. Time | Area    | Height | Conc.  | Unit | Mark | Name |
|-------|-----------|---------|--------|--------|------|------|------|
| 1     | 28.947    | 49044   | 2011   | 0.640  |      | M    |      |
| 2     | 30.014    | 7618139 | 109363 | 99.360 |      | M    |      |
| Total |           | 7667183 | 111375 |        |      |      |      |

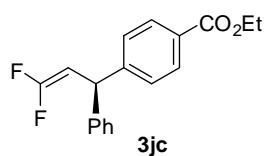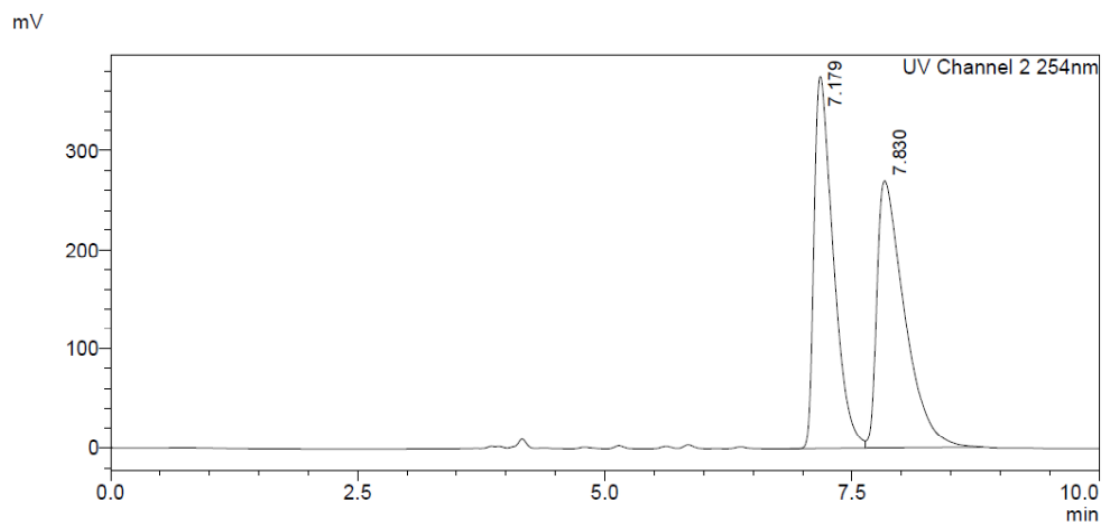

**<Peak Table>**

UV Channel 2 254nm

| Peak# | Ret. Time | Area     | Height | Conc.  | Unit | Mark | Name |
|-------|-----------|----------|--------|--------|------|------|------|
| 1     | 7.179     | 5072620  | 375132 | 49.139 |      | M    |      |
| 2     | 7.830     | 5250436  | 270141 | 50.861 |      | V M  |      |
| Total |           | 10323056 | 645273 |        |      |      |      |

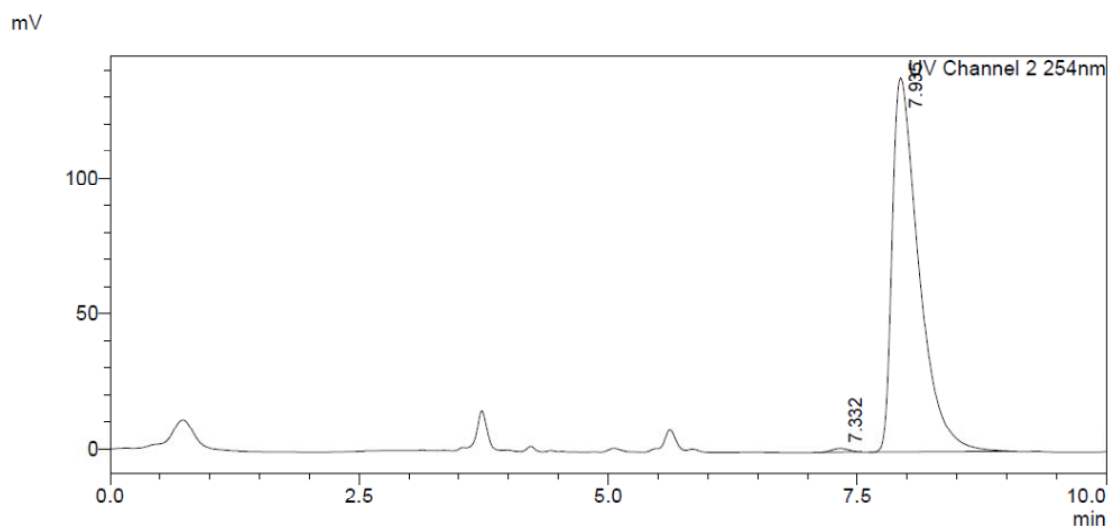

**<Peak Table>**

UV Channel 2 254nm

| Peak# | Ret. Time | Area    | Height | Conc.  | Unit | Mark | Name |
|-------|-----------|---------|--------|--------|------|------|------|
| 1     | 7.332     | 14914   | 1304   | 0.576  |      | M    |      |
| 2     | 7.935     | 2575238 | 138126 | 99.424 |      | M    |      |
| Total |           | 2590153 | 139430 |        |      |      |      |

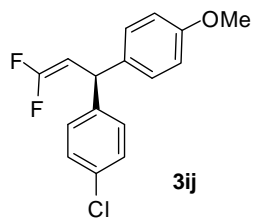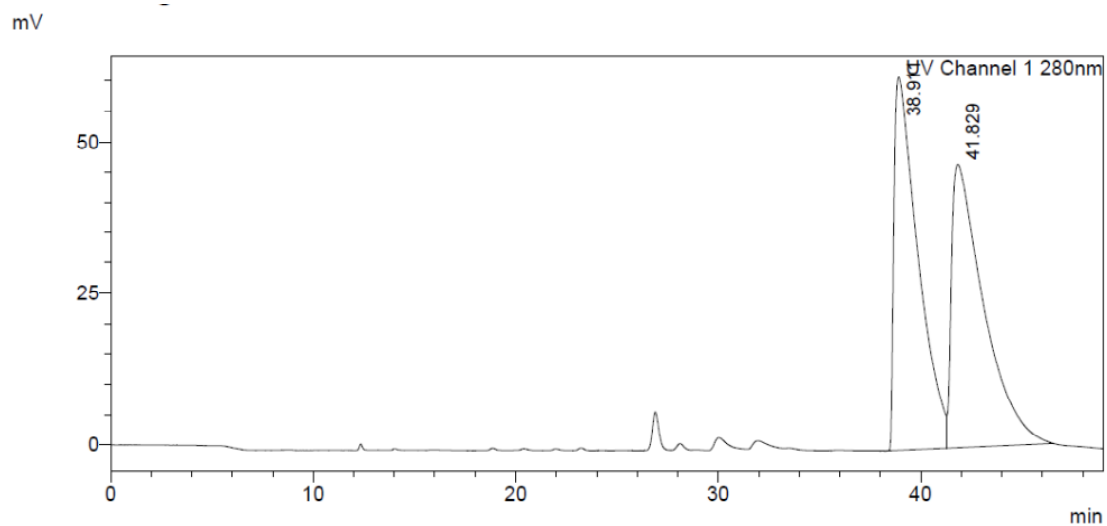

### <Peak Table>

UV Channel 1 280nm

| Peak# | Ret. Time | Area     | Height | Conc.  | Unit | Mark | Name |
|-------|-----------|----------|--------|--------|------|------|------|
| 1     | 38.911    | 5052916  | 61428  | 49.487 |      | M    |      |
| 2     | 41.829    | 5157673  | 46706  | 50.513 |      | V M  |      |
| Total |           | 10210590 | 108134 |        |      |      |      |

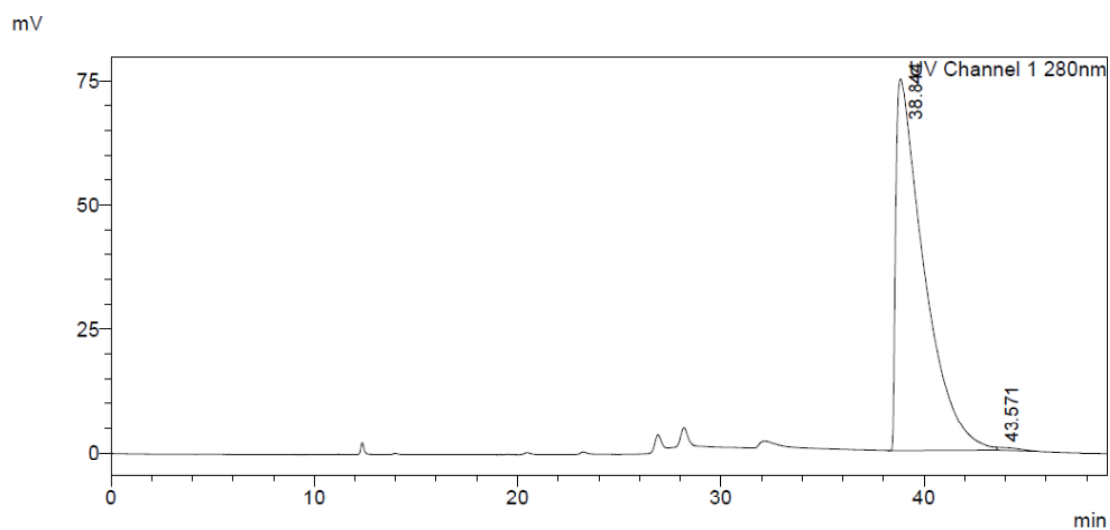

### <Peak Table>

UV Channel 1 280nm

| Peak# | Ret. Time | Area    | Height | Conc.  | Unit | Mark | Name |
|-------|-----------|---------|--------|--------|------|------|------|
| 1     | 38.844    | 7189991 | 74918  | 99.452 |      | M    |      |
| 2     | 43.571    | 39589   | 561    | 0.548  |      | M    |      |
| Total |           | 7229580 | 75479  |        |      |      |      |

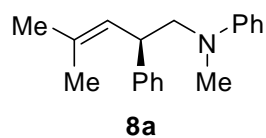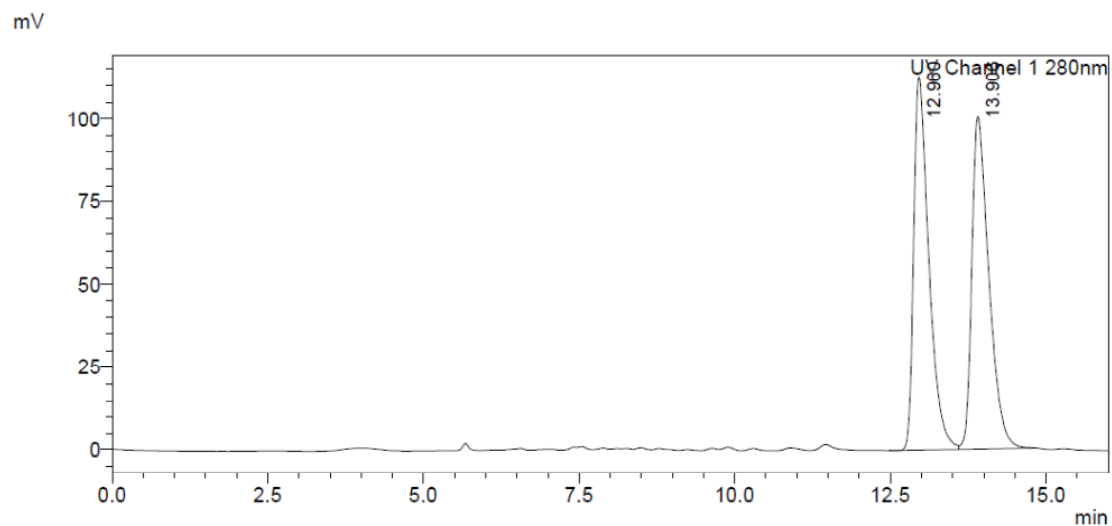

**<Peak Table>**

UV Channel 1 280nm

| Peak# | Ret. Time | Area    | Height | Conc.  | Unit | Mark | Name |
|-------|-----------|---------|--------|--------|------|------|------|
| 1     | 12.960    | 1915933 | 112734 | 50.011 |      | M    |      |
| 2     | 13.906    | 1915106 | 100462 | 49.989 |      | V M  |      |
| Total |           | 3831039 | 213197 |        |      |      |      |

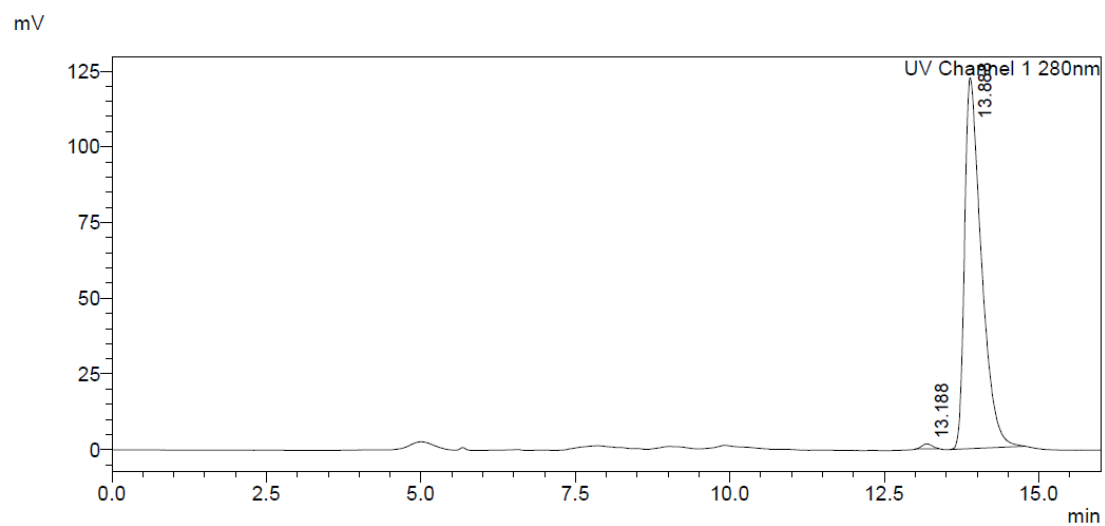

**<Peak Table>**

UV Channel 1 280nm

| Peak# | Ret. Time | Area    | Height | Conc.  | Unit | Mark | Name |
|-------|-----------|---------|--------|--------|------|------|------|
| 1     | 13.188    | 19411   | 1654   | 0.831  |      | M    |      |
| 2     | 13.888    | 2315757 | 122342 | 99.169 |      | M    |      |
| Total |           | 2335168 | 123995 |        |      |      |      |

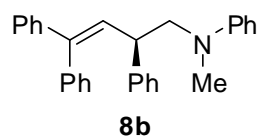

# <Chromatogram>

mV

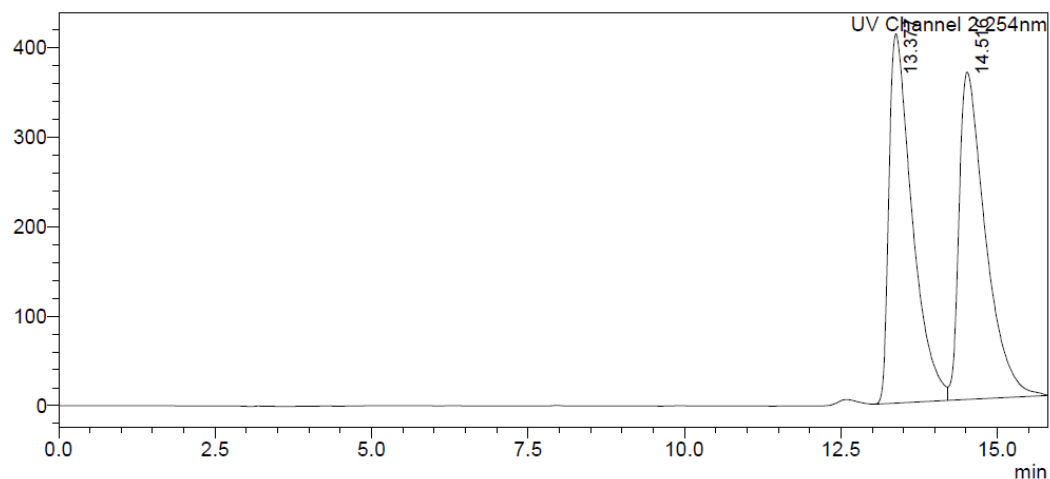

## <Peak Table>

UV Channel 2 254nm

| Peak# | Ret. Time | Area     | Height | Conc.  | Unit | Mark | Name |
|-------|-----------|----------|--------|--------|------|------|------|
| 1     | 13.377    | 10658343 | 412371 | 49.814 |      | M    |      |
| 2     | 14.516    | 10738133 | 365825 | 50.186 |      | V M  |      |
| Total |           | 21396476 | 778196 |        |      |      |      |

mV

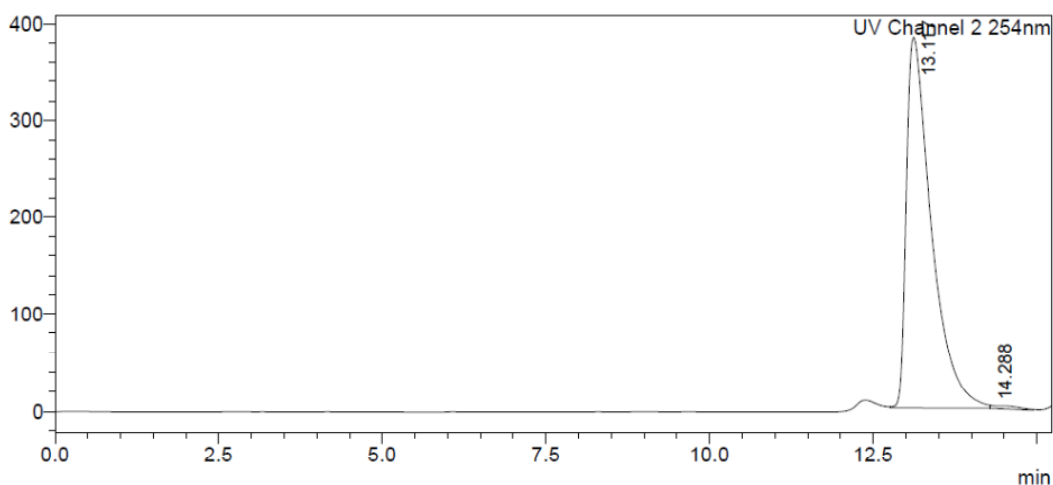

## <Peak Table>

UV Channel 2 254nm

| Peak# | Ret. Time | Area     | Height | Conc.  | Unit | Mark | Name |
|-------|-----------|----------|--------|--------|------|------|------|
| 1     | 13.117    | 10101078 | 382632 | 99.104 |      | M    |      |
| 2     | 14.288    | 91353    | 3023   | 0.896  |      | M    |      |
| Total |           | 10192431 | 385655 |        |      |      |      |

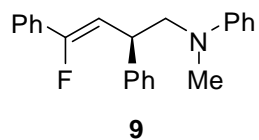

mV

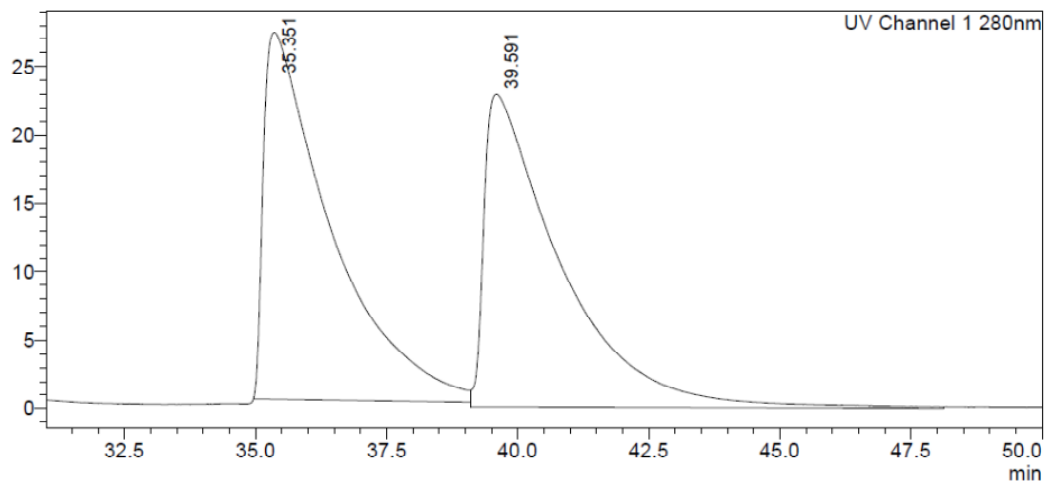

**<Peak Table>**

UV Channel 1 280nm

| Peak# | Ret. Time | Area    | Height | Conc.  | Unit | Mark | Name |
|-------|-----------|---------|--------|--------|------|------|------|
| 1     | 35.351    | 2382660 | 26814  | 50.631 |      | M    |      |
| 2     | 39.591    | 2323294 | 22902  | 49.369 |      | M    |      |
| Total |           | 4705954 | 49716  |        |      |      |      |

mV

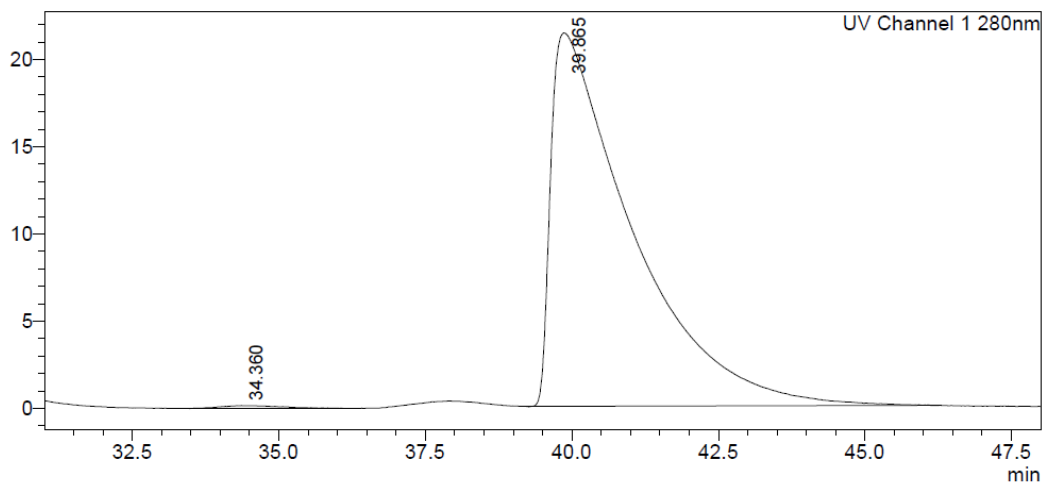

**<Peak Table>**

UV Channel 1 280nm

| Peak# | Ret. Time | Area    | Height | Conc.  | Unit | Mark | Name |
|-------|-----------|---------|--------|--------|------|------|------|
| 1     | 34.360    | 10904   | 151    | 0.526  |      | M    |      |
| 2     | 39.865    | 2062775 | 21400  | 99.474 |      | M    |      |
| Total |           | 2073679 | 21551  |        |      |      |      |

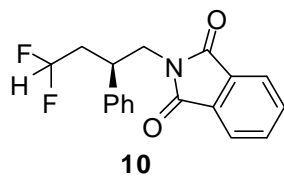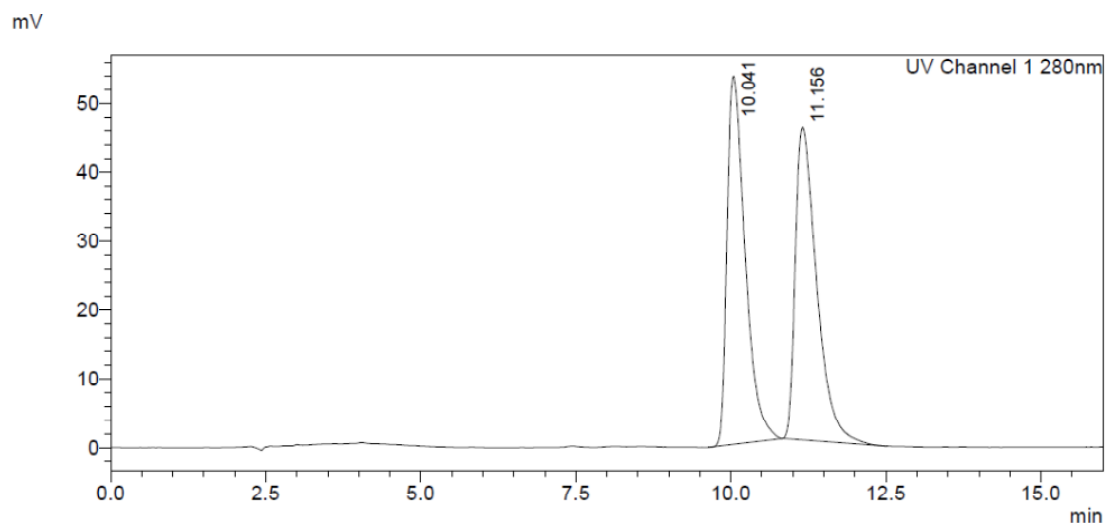

**<Peak Table>**

UV Channel 1 280nm

| Peak# | Ret. Time | Area    | Height | Conc.  | Unit | Mark | Name |
|-------|-----------|---------|--------|--------|------|------|------|
| 1     | 10.041    | 1086684 | 53525  | 49.981 |      | M    |      |
| 2     | 11.156    | 1087510 | 45360  | 50.019 |      | M    |      |
| Total |           | 2174194 | 98885  |        |      |      |      |

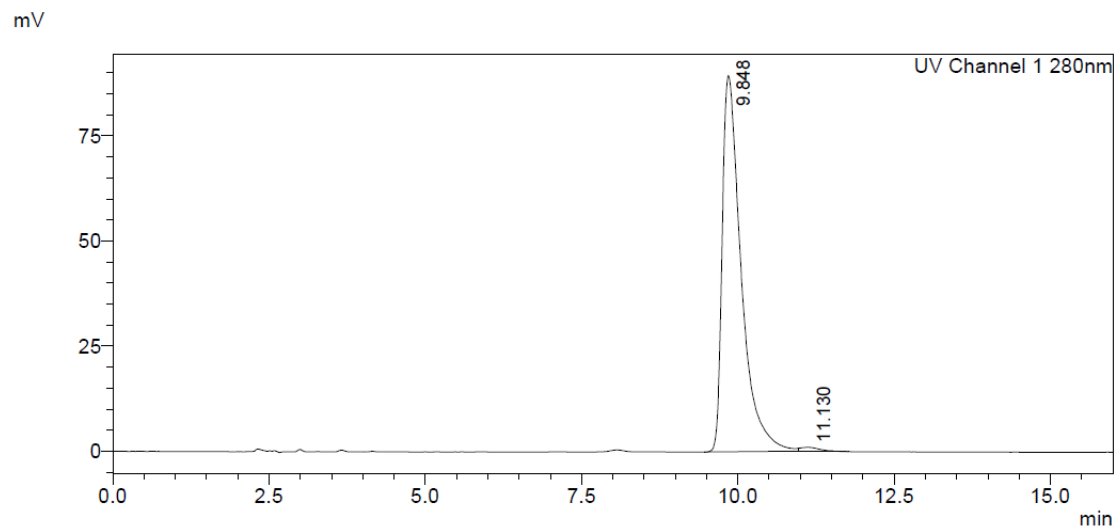

**<Peak Table>**

UV Channel 1 280nm

| Peak# | Ret. Time | Area    | Height | Conc.  | Unit | Mark | Name |
|-------|-----------|---------|--------|--------|------|------|------|
| 1     | 9.848     | 1889276 | 89454  | 99.033 |      | M    |      |
| 2     | 11.130    | 18444   | 905    | 0.967  |      | M    |      |
| Total |           | 1907720 | 90359  |        |      |      |      |

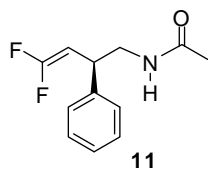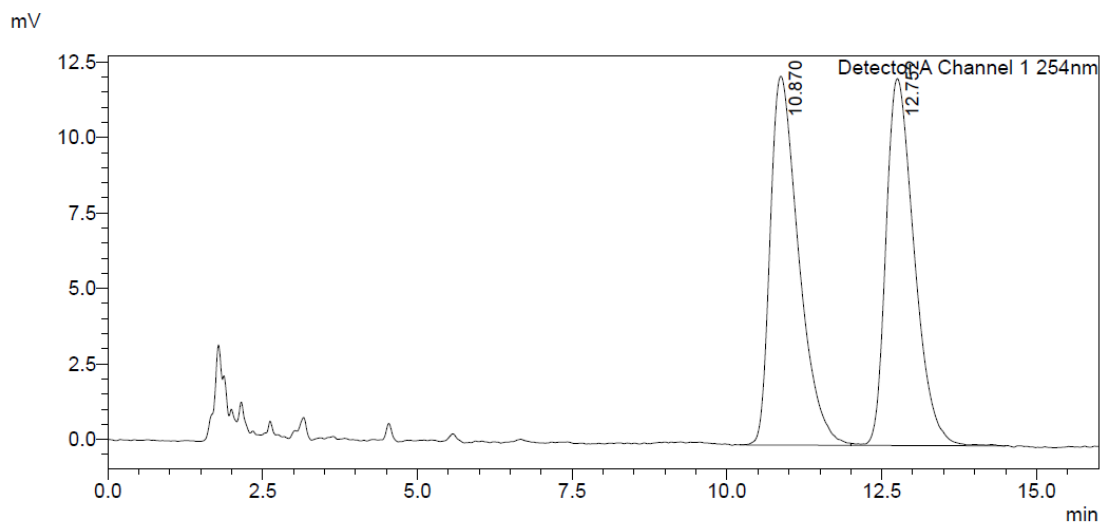

**<Peak Table>**

Detector A Channel 1 254nm

| Peak# | Ret. Time | Area   | Height | Conc.  | Unit | Mark | Name |
|-------|-----------|--------|--------|--------|------|------|------|
| 1     | 10.870    | 391756 | 12217  | 50.345 |      | M    |      |
| 2     | 12.752    | 386381 | 12148  | 49.655 |      | V M  |      |
| Total |           | 778137 | 24365  |        |      |      |      |

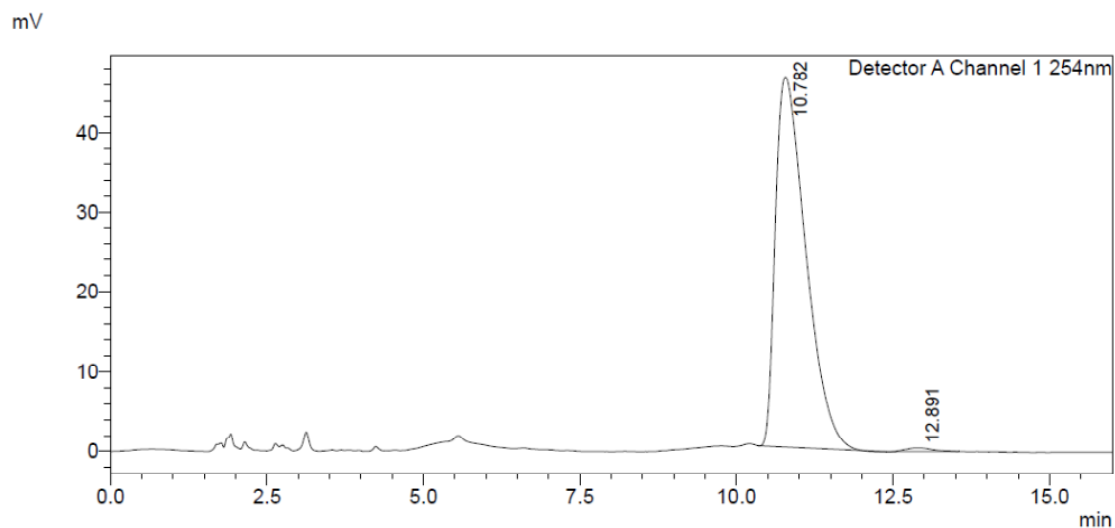

**<Peak Table>**

Detector A Channel 1 254nm

| Peak# | Ret. Time | Area    | Height | Conc.  | Unit | Mark | Name |
|-------|-----------|---------|--------|--------|------|------|------|
| 1     | 10.782    | 1565201 | 46395  | 99.152 |      | M    |      |
| 2     | 12.891    | 13387   | 468    | 0.848  |      | M    |      |
| Total |           | 1578588 | 46863  |        |      |      |      |
